# Supplementary material for: Multiresidue Pesticides Analysis of Vegetables in Vietnam by Ultrahigh-Performance Liquid Chromatography in Combination with High-Resolution Mass Spectrometry (UPLC-Orbitrap MS)
Source: Hindawi journal article supplement (doi:10.1155/2019/3489634), 2019-05-08
Supplement: f1 [file 3489634.f1.pdf]

**Multiresidue pesticides analysis in vegetables in Vietnam by ultrahigh performance liquid chromatography in combination with high resolution mass spectrometry (UPLC-Orbitrap MS)**

Nam Vu-Duc<sup>1</sup>, Trung Nguyen-Quang<sup>1</sup>, Thuy Le-Minh<sup>1,2</sup>, Xuyen Nguyen-Thi<sup>1,2</sup>, Tri Manh Tran<sup>2</sup>, Hai Anh Vu<sup>2</sup>, Lan-Anh Nguyen<sup>2</sup>, Tien Doan-Duy<sup>3</sup>, Hoi Bui -Van<sup>4</sup>, Cam-Tu Vu<sup>4</sup>, Dung Le-Van<sup>5</sup>, Lan-Anh Phung-Thi<sup>6</sup>, Hong-An Vu-Thi<sup>7</sup>, Dinh Binh Chu<sup>7</sup>

<sup>1</sup>Center for Research and Technology Transfer, Vietnam Academy of Science and Technology (VAST), 18 Hoang Quoc Viet, Hanoi 100000, Vietnam

<sup>2</sup>Faculty of Chemistry, VNU University of Science, Vietnam National University-Hanoi, 19 Le Thanh Tong, Hanoi 100000, Vietnam

<sup>3</sup>Institute of Chemistry, Vietnam Academy of Science and Technology, 18 Hoang Quoc Viet, Hanoi, 100000, Vietnam

<sup>4</sup>Department of Water - Environment - Oceanography, University of Science and Technology of Hanoi (USTH), Vietnam Academy of Science and Technology (VAST), 18 Hoang Quoc Viet, Hanoi 100000, Vietnam

<sup>5</sup>Department of Chemistry, Vietnam Military Medical University, 160 Phung Hung, Hadong, Hanoi 100000, Vietnam

<sup>6</sup>School of Environmental Science and Technology, Hanoi University of Science and Technology, 1 Dai Co Viet, Hanoi 100000, Vietnam

<sup>7</sup>Department of Analytical Chemistry, School of Chemical Engineering, Hanoi University of Science and Technology, 1 Dai Co Viet, Hanoi 100000, Vietnam

Corresponding author:

1. Dr. Dinh Binh Chu

Department of Analytical Chemistry, School of Chemical Engineering, Hanoi University of Science and Technology, 1 Dai Co Viet, Hanoi 100000, Vietnam

Email: [binh.chudinh@hust.edu.vn](mailto:binh.chudinh@hust.edu.vn)

Fax: + 84 2438680070

Phone: + 84 2438692206

2. Dr. Nam Vu-Duc

Center for Research and Technology Transfer, Vietnam Academy of Science and Technology, 18 Hoang Quoc Viet, Hanoi 100000, Vietnam

Email: [namvd@yahoo.com](mailto:namvd@yahoo.com)

Fax: +84 2437568422

Phone: + 84 2437568422

## Contents

|                                                                                                                                                                        |    |
|------------------------------------------------------------------------------------------------------------------------------------------------------------------------|----|
| Table S1: Mass accuracy and retention time of target analytes in neat solvent and matrix matched solutions .....                                                       | 3  |
| Table S2: Calibration curves and correlation of analytes on the UPLC-Orbitrap Q Exactive MS .....                                                                      | 6  |
| Table S3. Analytical figures of merit of the UPLC- Q Exactive Orbitrap MS method for pesticide analysis .....                                                          | 8  |
| Table S4a: Matrix effect, recovery of extraction and overall recovery of pesticides in pooled samples....                                                              | 10 |
| Table S4b: Matrix effect, recovery of extraction and overall recovery of pesticides in three vegetable matrices (cabbage, white mustard and edible chrysanthemum)..... | 12 |
| Table S5: Mass and mass accuracy of analytical product ions .....                                                                                                      | 14 |
| Table S6. Short- and long-term stability of the analytical signal in standard solution and in matrix-match solution.....                                               | 16 |
| Fig. S1. The total ion chromatogram of the target analytes in the standard solution (positive mode).....                                                               | 18 |
| Fig. S2. The total ion chromatogram of the target analytes in the standard solution (negative mode).....                                                               | 34 |
| Fig. S3. The total ion chromatogram and extracted ion chromatogram of the target analytes in the matrix match solution (positive mode).....                            | 40 |
| Fig. S4. The total ion chromatogram and extracted ion chromatogram of the target analytes in the matrix match solution (negative mode).....                            | 56 |
| Fig. S5: The total ion chromatogram and extract ion chromatogram of the target analytes in several real samples (positive mode) .....                                  | 62 |
| Fig. S6. The total ion chromatogram and extracted ion chromatogram of the target analytes in several real samples (negative mode).....                                 | 66 |

Table S1: Mass accuracy and retention time of target analytes in neat solvent and matrix matched solutions

| No | Compound name       | Chemical formula                                                                            | Category                                            | Precursor theoretical (polarity) | RT ± rsd, min (n=6) |              | [M+H] or [M-H] experiment |                   |               |                   |
|----|---------------------|---------------------------------------------------------------------------------------------|-----------------------------------------------------|----------------------------------|---------------------|--------------|---------------------------|-------------------|---------------|-------------------|
|    |                     |                                                                                             |                                                     |                                  | solvent             | Match matrix | solvent                   |                   | Match matrix  |                   |
|    |                     |                                                                                             |                                                     |                                  |                     |              | Mass accuracy             | m/z ± SD (n=6)    | Mass accuracy | m/z ± SD (n=6)    |
| 1  | Fenoxaprop-P-Ethyl  | C <sub>18</sub> H <sub>16</sub> ClNO <sub>5</sub>                                           | aryloxyphenoxypropionate                            | 362.0790 (+)                     | 17.70 ± 0.27        | 17.66 ± 0.09 | -1.93                     | 362.0783 ± 0.0001 | -2.67         | 362.0780 ± 0.0001 |
| 2  | Fenoxanil           | C <sub>15</sub> H <sub>18</sub> Cl <sub>2</sub> N <sub>2</sub> O <sub>2</sub>               | Amide                                               | 329.0818 (+)                     | 15.12 ± 0.09        | 15.06 ± 0.15 | -1.92                     | 329.0812 ± 0.0001 | -2.53         | 329.0810 ± 0.0002 |
| 3  | Chlorantraniliprole | C <sub>18</sub> H <sub>14</sub> BrCl <sub>2</sub> N <sub>5</sub> O <sub>2</sub>             | anthranilic diamide                                 | 481.9781 (+)                     | 11.5 ± 0.18         | 11.47 ± 0.15 | -1.59                     | 481.9773 ± 0.0002 | -2.42         | 481.9769 ± 0.0001 |
| 4  | Fluopicolide        | C <sub>14</sub> H <sub>8</sub> Cl <sub>3</sub> F <sub>3</sub> N <sub>2</sub> O              | benzamide pyridine                                  | 382.9727 (+)                     | 13.40 ± 0.05        | 13.35 ± 0.21 | -1.44                     | 382.9722 ± 0.0001 | -2.13         | 382.9719 ± 0.0001 |
| 5  | Chlorfluazuron      | C <sub>20</sub> H <sub>9</sub> Cl <sub>3</sub> F <sub>5</sub> N <sub>3</sub> O <sub>3</sub> | Benzoylurea                                         | 539.9702 (+)                     | 20.34 ± 0.09        | 20.34 ± 0.09 | -1.73                     | 539.9693 ± 0.0002 | -2.53         | 539.9688 ± 0.0003 |
|    |                     |                                                                                             |                                                     | 537.9557 (-)                     | 20.18 ± 0.16        | 20.18 ± 0.08 | 0.74                      | 537.9561 ± 0.0001 | 0.68          | 537.9561 ± 0.0001 |
| 6  | Diflubenzuron       | C <sub>14</sub> H <sub>9</sub> ClF <sub>2</sub> N <sub>2</sub> O <sub>2</sub>               | Benzoylurea                                         | 311.0393 (+)                     | 14.99 ± 0.11        | 14.93 ± 0.12 | -1.98                     | 311.0387 ± 0.0001 | -2.63         | 311.0385 ± 0.0001 |
|    |                     |                                                                                             |                                                     | 309.0248 (-)                     | 14.76 ± 0.13        | 14.73 ± 0.24 | 0.84                      | 309.0251 ± 0.0001 | 0.86          | 309.0251 ± 0.0001 |
| 7  | Carbaryl            | C <sub>12</sub> H <sub>11</sub> NO <sub>2</sub>                                             | Carbamate                                           | 202.0862 (+)                     | 9.47 ± 0.28         | 9.43 ± 0.10  | -1.15                     | 202.0860 ± 0.0001 | -1.73         | 202.0859 ± 0.0001 |
| 8  | Carbofuran          | C <sub>12</sub> H <sub>15</sub> NO <sub>3</sub>                                             | Carbamate                                           | 222.1125 (+)                     | 8.03 ± 0.18         | 7.99 ± 0.17  | -1.20                     | 222.1122 ± 0.0001 | -2.25         | 222.1120 ± 0.0001 |
| 9  | Methomyl            | C <sub>5</sub> H <sub>10</sub> N <sub>2</sub> O <sub>2</sub> S                              | Carbamate                                           | 163.0536 (+)                     | 4.58 ± 0.23         | 4.27 ± 0.25  | -1.64                     | 163.0533 ± 0.0001 | -1.64         | 163.0533 ± 0.0001 |
| 10 | Niclosamide         | C <sub>13</sub> H <sub>8</sub> Cl <sub>2</sub> N <sub>2</sub> O <sub>4</sub>                | Chloronitrophenol                                   | 324.9788 (-)                     | 18.67 ± 0.14        | 18.67 ± 0.13 | 0.92                      | 324.9791 ± 0.0001 | 0.72          | 324.9790 ± 0.0001 |
| 11 | Tebufenozide        | C <sub>22</sub> H <sub>28</sub> N <sub>2</sub> O <sub>2</sub>                               | Diacylhydrazine                                     | 353.2224 (+)                     | 14.68 ± 0.14        | 14.63 ± 0.18 | -2.22                     | 353.2216 ± 0.0001 | -2.83         | 353.2214 ± 0.0002 |
|    |                     |                                                                                             |                                                     | 351.2078 (-)                     | 14.48 ± 0.16        | 14.45 ± 0.25 | 0.63                      | 351.2080 ± 0.0001 | 0.71          | 351.2081 ± 0.0001 |
| 12 | Pendimethalin       | C <sub>13</sub> H <sub>19</sub> N <sub>3</sub> O <sub>4</sub>                               | Dinitroaniline                                      | 282.1448 (+)                     | 18.64 ± 0.21        | 18.58 ± 0.13 | -1.54                     | 282.1444 ± 0.0001 | -2.48         | 282.1441 ± 0.0001 |
| 13 | Prochloraz          | C <sub>15</sub> H <sub>16</sub> Cl <sub>3</sub> N <sub>3</sub> O <sub>2</sub>               | Imidazole                                           | 376.0381 (+)                     | 16.34 ± 0.14        | 16.28 ± 0.12 | -1.82                     | 376.0374 ± 0.0001 | -2.53         | 376.0372 ± 0.0001 |
| 14 | Clomazone           | C <sub>12</sub> H <sub>14</sub> ClNO <sub>2</sub>                                           | Isoxazolidinone                                     | 240.0786 (+)                     | 11.44 ± 0.20        | 11.40 ± 0.13 | -1.25                     | 240.0783 ± 0.0001 | -2.29         | 240.0781 ± 0.0001 |
| 15 | Dinotefuran         | C <sub>7</sub> H <sub>14</sub> N <sub>4</sub> O <sub>3</sub>                                | Neonicotinoid                                       | 201.0993 (-)                     | 3.87 ± 0.19         | 3.72 ± 0.43  | -4.14                     | 201.0985 ± 0.0001 | -2.82         | 201.0987 ± 0.0001 |
| 16 | Imidacloprid        | C <sub>9</sub> H <sub>10</sub> ClN <sub>5</sub> O <sub>2</sub>                              | Neonicotinoid                                       | 256.0596 (+)                     | 5.76 ± 0.26         | 5.74 ± 0.09  | -1.56                     | 256.0592 ± 0.0001 | -2.41         | 256.0590 ± 0.0001 |
| 17 | Pentachlorophenol   | C <sub>6</sub> HCl <sub>5</sub> O                                                           | organochlorin- POPs (persistent Organic pollutants) | 262.8397 (-)                     | 17.50 ± 0.08        | 17.49 ± 0.16 | 1.29                      | 262.8400 ± 0.0001 | 1.08          | 262.8400 ± 0.0001 |
| 18 | Diazinon            | C <sub>12</sub> H <sub>21</sub> N <sub>2</sub> O <sub>3</sub> PS                            | Organophosphate                                     | 305.1083 (+)                     | 15.40 ± 0.15        | 15.35 ± 0.16 | -1.80                     | 305.1078 ± 0.0001 | -2.57         | 305.1075 ± 0.0001 |
| 19 | Dimethoate          | C <sub>5</sub> H <sub>12</sub> NO <sub>3</sub> PS <sub>2</sub>                              | Organophosphate                                     | 230.0069 (+)                     | 5.67 ± 0.30         | 5.65 ± 0.13  | -1.23                     | 230.0066 ± 0.0004 | -2.03         | 230.0064 ± 0.0001 |
| 20 | Phenthoate          | C <sub>12</sub> H <sub>17</sub> O <sub>4</sub> PS <sub>2</sub>                              | Organophosphate                                     | 321.0379 (+)                     | 15.25 ± 0.14        | 15.20 ± 0.15 | -1.82                     | 321.0373 ± 0.0001 | -2.54         | 321.0371 ± 0.0002 |
| 21 | Profenofos          | C <sub>11</sub> H <sub>15</sub> BrClO <sub>3</sub> PS                                       | Organophosphate                                     | 372.9424 (+)                     | 16.93 ± 0.18        | 16.89 ± 0.07 | -1.12                     | 372.9420 ± 0.0004 | -2.06         | 372.9416 ± 0.0001 |
| 22 | Quinalphos          | C <sub>12</sub> H <sub>15</sub> N <sub>2</sub> O <sub>3</sub> PS                            | Organophosphate                                     | 299.0614 (+)                     | 14.97 ± 0.12        | 14.92 ± 0.14 | -1.67                     | 299.0609 ± 0.0001 | -2.51         | 299.0607 ± 0.0002 |

| No | Compound name        | Chemical formula                                                                | Category              | Precursor theoretical (polarity) | RT ± rsd, min (n=6) |              | [M+H] or [M-H] experiment |                    |               |                    |
|----|----------------------|---------------------------------------------------------------------------------|-----------------------|----------------------------------|---------------------|--------------|---------------------------|--------------------|---------------|--------------------|
|    |                      |                                                                                 |                       |                                  | solvent             | Match matrix | solvent                   |                    | Match matrix  |                    |
|    |                      |                                                                                 |                       |                                  |                     |              | Mass accuracy             | m/z ± SD (n=6)     | Mass accuracy | m/z ± SD (n=6)     |
| 23 | Triazophos           | C <sub>12</sub> H <sub>16</sub> N <sub>3</sub> O <sub>3</sub> PS                | Organophosphate       | 314.0723 (+)                     | 13.93 ± 0.12        | 13.88 ± 0.20 | -1.96                     | 314.0717 ± 0.0001  | -2.65         | 314.0715 ± 0.0001  |
| 24 | Trichlorfon          | C <sub>4</sub> H <sub>8</sub> Cl <sub>3</sub> O <sub>4</sub> P                  | Organophosphate       | 256.9298 (+)                     | 5.20 ± 0.24         | 5.18 ± 0.14  | -1.04                     | 256.9295 ± 0.0001  | -2.21         | 256.9292 ± 0.0001  |
| 25 | Dichlorvos           | C <sub>4</sub> H <sub>7</sub> Cl <sub>2</sub> O <sub>4</sub> P                  | Organophosphate       | 220.9532 (+)                     | 8.19 ± 0.20         | 8.15 ± 0.14  | -0.60                     | 220.9531 ± 0.0001  | -1.81         | 220.9528 ± 0.0001  |
| 26 | Parathion-methyl     | C <sub>8</sub> H <sub>10</sub> NO <sub>5</sub> PS                               | Organophosphate       | 261.9944 (-)                     | 6.56 ± 0.28         | 6.56 ± 0.20  | 1.15                      | 261.9947 ± 0.0001  | 0.76          | 261.9946 ± 0.0001  |
| 27 | Indoxacarb           | C <sub>22</sub> H <sub>17</sub> ClF <sub>3</sub> N <sub>3</sub> O <sub>7</sub>  | Oxadiazine            | 528.078 (+)                      | 18.15 ± 0.26        | 18.10 ± 0.14 | -1.74                     | 528.0771 ± 0.0002  | -2.49         | 528.0767 ± 0.0002  |
| 28 | Oxadialargyl         | C <sub>15</sub> H <sub>14</sub> Cl <sub>2</sub> N <sub>2</sub> O <sub>3</sub>   | Oxidiazole            | 341.0454 (+)                     | 15.97 ± 0.18        | 15.92 ± 0.16 | -1.86                     | 341.0448 ± 0.0002  | -2.59         | 341.0445 ± 0.0001  |
| 29 | Oxadiazon            | C <sub>15</sub> H <sub>18</sub> Cl <sub>2</sub> N <sub>2</sub> O <sub>3</sub>   | Oxidiazole            | 345.0767 (+)                     | 17.91 ± 0.18        | 17.86 ± 0.10 | -1.69                     | 345.0761 ± 0.0001  | -2.56         | 345.0758 ± 0.0001  |
| 30 | Linuron              | C <sub>9</sub> H <sub>10</sub> Cl <sub>2</sub> N <sub>2</sub> O <sub>2</sub>    | Phenylurea            | 249.0192 (+)                     | 12.77 ± 0.14        | 12.71 ± 0.11 | -1.27                     | 249.0189 ± 0.00004 | -1.81         | 249.0188 ± 0.0001  |
| 31 | Diuron               | C <sub>9</sub> H <sub>10</sub> Cl <sub>2</sub> N <sub>2</sub> O                 | Phenylurea            | 233.0243 (+)                     | 11.28 ± 0.20        | 11.23 ± 0.13 | -0.93                     | 233.0241 ± 0.0001  | -1.72         | 233.0239 ± 0.0001  |
|    |                      |                                                                                 |                       | 231.0097 (-)                     | 11.03 ± 0.23        | 11.01 ± 0.28 | -0.94                     | 231.0095 ± 0.0001  | -1.37         | 231.0094 ± 0.00004 |
| 32 | Fipronil             | C <sub>12</sub> H <sub>4</sub> Cl <sub>2</sub> F <sub>6</sub> N <sub>4</sub> OS | Phenylpyrazole        | 434.9314 (-)                     | 16.39 ± 0.16        | 16.38 ± 0.16 | 0.87                      | 434.9318 ± 0.0001  | 0.61          | 434.9317 ± 0.0001  |
| 33 | Fludioxonil          | C <sub>12</sub> H <sub>6</sub> F <sub>2</sub> N <sub>2</sub> O <sub>2</sub>     | Phenylpyrazole        | 247.0324 (-)                     | 13.98 ± 0.18        | 13.96 ± 0.20 | -0.49                     | 247.0323 ± 0.0001  | -0.47         | 247.0323 ± 0.00004 |
| 34 | Fenitrothion         | C <sub>9</sub> H <sub>12</sub> NO <sub>5</sub> PS                               | Phosphorothioate      | 278.0246 (+)                     | 13.38 ± 0.07        | 13.32 ± 0.28 | -1.74                     | 278.0241 ± 0.0001  | -1.80         | 278.0241 ± 0.0001  |
| 35 | Pyridalyl            | C <sub>18</sub> H <sub>14</sub> Cl <sub>4</sub> F <sub>3</sub> NO <sub>3</sub>  | Pyridalyl             | 489.9753 (+)                     | 22.23 ± 0.04        | 22.26 ± 0.17 | -1.94                     | 489.9744 ± 0.0001  | -2.93         | 489.9739 ± 0.0001  |
| 36 | Pyribenzoxim         | C <sub>32</sub> H <sub>27</sub> N <sub>5</sub> O <sub>8</sub>                   | Pyrimidinyloxybenzoic | 610.1932 (+)                     | 18.32 ± 0.28        | 18.24 ± 0.14 | -2.08                     | 610.1919 ± 0.0004  | -2.81         | 610.1915 ± 0.0001  |
| 37 | Pyridaben            | C <sub>19</sub> H <sub>25</sub> ClN <sub>2</sub> OS                             | Pyridazinone          | 365.1449 (+)                     | 19.54 ± 0.09        | 19.51 ± 0.09 | -1.64                     | 365.1443 ± 0.0001  | -2.24         | 365.1441 ± 0.0001  |
| 38 | Pyriproxyfen         | C <sub>20</sub> H <sub>19</sub> NO <sub>3</sub>                                 | pyridine-based        | 322.1438 (+)                     | 17.79 ± 0.29        | 17.75 ± 0.10 | -1.97                     | 322.1432 ± 0.0001  | -2.79         | 322.1429 ± 0.0001  |
| 39 | Rotenone             | C <sub>23</sub> H <sub>22</sub> O <sub>6</sub>                                  | Rotenoid              | 395.1489 (+)                     | 15.10 ± 0.11        | 15.05 ± 0.16 | -1.98                     | 395.1481 ± 0.0002  | -2.78         | 395.1478 ± 0.0002  |
| 40 | Azoxystrobin         | C <sub>22</sub> H <sub>17</sub> N <sub>3</sub> O <sub>5</sub>                   | Strobilurin           | 404.1241 (+)                     | 13.49 ± 0.06        | 13.44 ± 0.25 | -1.86                     | 404.1234 ± 0.0001  | -2.39         | 404.1231 ± 0.0001  |
| 41 | Picoxystrobin        | C <sub>18</sub> H <sub>16</sub> F <sub>3</sub> NO <sub>4</sub>                  | Strobilurin           | 368.1104 (+)                     | 15.54 ± 0.16        | 15.49 ± 0.16 | -1.99                     | 368.1097 ± 0.0002  | -2.81         | 368.1094 ± 0.0002  |
| 42 | Trifloxystrobin      | C <sub>20</sub> H <sub>19</sub> F <sub>3</sub> N <sub>2</sub> O <sub>4</sub>    | Strobilurin           | 409.137 (+)                      | 17.56 ± 0.33        | 17.47 ± 0.08 | -2.20                     | 409.1361 ± 0.0002  | -2.57         | 409.1360 ± 0.0001  |
| 43 | Cinosulfuron         | C <sub>15</sub> H <sub>19</sub> N <sub>5</sub> O <sub>7</sub> S                 | Sulfonylurea          | 414.1078 (+)                     | 9.94 ± 0.29         | 9.91 ± 0.15  | -1.93                     | 414.1070 ± 0.0002  | -2.54         | 414.1068 ± 0.0001  |
|    |                      |                                                                                 |                       | 412.0932 (-)                     | 9.70 ± 0.21         | 9.68 ± 0.09  | 1.42                      | 412.0938 ± 0.0001  | 1.29          | 412.0937 ± 0.0001  |
| 44 | Metsulfuron methyl   | C <sub>14</sub> H <sub>15</sub> N <sub>5</sub> O <sub>6</sub> S                 | Sulfonylurea          | 382.0816 (+)                     | 11.02 ± 0.21        | 10.98 ± 0.18 | -2.01                     | 382.0808 ± 0.0001  | -2.97         | 382.0805 ± 0.0001  |
|    |                      |                                                                                 |                       | 380.0670 (-)                     | 10.77 ± 0.27        | 10.75 ± 0.20 | 0.96                      | 380.0674 ± 0.0001  | 0.92          | 380.0674 ± 0.0001  |
| 45 | Pyrazosulfuron Ethyl | C <sub>14</sub> H <sub>18</sub> N <sub>6</sub> O <sub>7</sub> S                 | Sulfonylurea          | 415.103 (+)                      | 14.86 ± 0.29        | 14.77 ± 0.12 | -3.49                     | 415.1016 ± 0.0001  | -2.41         | 415.1020 ± 0.0001  |
|    |                      |                                                                                 |                       | 413.0885 (-)                     | 14.59 ± 0.21        | 14.56 ± 0.24 | 0.24                      | 413.0886 ± 0.0011  | 0.93          | 413.0889 ± 0.0001  |
| 46 | Fentrazamide         | C <sub>16</sub> H <sub>20</sub> ClN <sub>5</sub> O <sub>2</sub>                 | Tetrazolinone         | 350.1378 (+)                     | 15.77 ± 0.16        | 15.72 ± 0.18 | -1.86                     | 350.1372 ± 0.0001  | -2.76         | 350.1368 ± 0.0001  |
| 47 | Cyproconazole        | C <sub>15</sub> H <sub>18</sub> ClN <sub>3</sub> O                              | Triazole              | 292.1211 (+)                     | 12.92 ± 0.09        | 12.87 ± 0.14 | -1.65                     | 292.1206 ± 0.0001  | -2.34         | 292.1204 ± 0.0001  |
| 48 | Difenoconazole       | C <sub>19</sub> H <sub>17</sub> Cl <sub>2</sub> N <sub>3</sub> O <sub>3</sub>   | Triazole              | 406.0720 (+)                     | 17.11 ± 0.26        | 17.06 ± 0.10 | -1.52                     | 406.0714 ± 0.0001  | -2.34         | 406.0711 ± 0.0001  |

| No | Compound name    | Chemical formula                                                               | Category         | Precursor theoretical (polarity) | RT ± rsd, min (n=6) |              | [M+H] or [M-H] experiment |                   |               |                    |
|----|------------------|--------------------------------------------------------------------------------|------------------|----------------------------------|---------------------|--------------|---------------------------|-------------------|---------------|--------------------|
|    |                  |                                                                                |                  |                                  | solvent             | Match matrix | solvent                   |                   | Match matrix  |                    |
|    |                  |                                                                                |                  |                                  |                     |              | Mass accuracy             | m/z ± SD (n=6)    | Mass accuracy | m/z ± SD (n=6)     |
| 49 | Propiconazole    | C <sub>15</sub> H <sub>17</sub> Cl <sub>2</sub> N <sub>3</sub> O <sub>2</sub>  | Triazole         | 342.0770 (+)                     | 15.49 ± 0.19        | 15.44 ± 0.15 | -1.71                     | 342.0764 ± 0.0001 | -2.63         | 342.0761 ± 0.0002  |
| 50 | Penoxsulam       | C <sub>16</sub> H <sub>14</sub> F <sub>5</sub> N <sub>5</sub> O <sub>5</sub> S | Triazopyrimidine | 484.0708 (+)                     | 11.55 ± 1.12        | 11.46 ± 0.14 | -2.07                     | 484.0698 ± 0.0001 | -2.62         | 484.0695 ± 0.0002  |
| 51 | Bromadiolone     | C <sub>30</sub> H <sub>23</sub> BrO <sub>4</sub>                               |                  | 525.0707 (-)                     | 17.63 ± 0.09        | 17.63 ± 0.17 | 0.91                      | 525.0712 ± 0.0001 | 0.60          | 525.0710 ± 0.0001  |
| 52 | Gibberellic acid | C <sub>19</sub> H <sub>22</sub> O <sub>6</sub>                                 |                  | 345.1344 (-)                     | 5.55 ± 0.25         | 5.53 ± 0.15  | 0.34                      | 345.1345 ± 0.0001 | 0.34          | 345.1345 ± 0.00004 |
| 53 | Spinosad A       | C <sub>41</sub> H <sub>65</sub> NO <sub>10</sub>                               |                  | 732.4681 (+)                     | 19.27 ± 0.15        | 19.25 ± 0.12 | -2.30                     | 732.4664 ± 0.0001 | -3.32         | 732.4657 ± 0.0002  |
|    | Spinosad D       | C <sub>42</sub> H <sub>67</sub> NO <sub>10</sub>                               |                  | 746.4838 (+)                     | 19.91 ± 0.13        | 19.91 ± 0.14 | -2.63                     | 746.4818 ± 0.0003 | -3.91         | 746.4809 ± 0.0004  |

Table S2: Calibration curves and correlation of analytes on the UPLC-Orbitrap Q Exactive MS

| No | Compound name        | RT $\pm$ RSD, min (n=6) |                  | Polarity | Regression equation                               | Correlation coefficient (R <sup>2</sup> ) |
|----|----------------------|-------------------------|------------------|----------|---------------------------------------------------|-------------------------------------------|
|    |                      | solvent                 | Matrix- match    |          |                                                   |                                           |
| 1  | Fenoxaprop-P-Ethyl   | 17.70 $\pm$ 0.27        | 17.66 $\pm$ 0.09 | +        | Y = 5.71e6X + 6.487e7                             | 0.9974                                    |
| 2  | Fenoxanil            | 15.12 $\pm$ 0.09        | 15.06 $\pm$ 0.15 | +        | Y = 4.182e6X + 8.905e7                            | 0.9924                                    |
| 3  | Chlorantraniliprole  | 11.5 $\pm$ 0.18         | 11.47 $\pm$ 0.15 | +        | Y = 4.372e5X + 8.847e5                            | 0.9996                                    |
| 4  | Fluopicolide         | 13.40 $\pm$ 0.05        | 13.35 $\pm$ 0.21 | +        | Y = 1.116e7X + 9.527e7                            | 0.9937                                    |
| 5  | Chlorfluazuron       | 20.34 $\pm$ 0.09        | 20.34 $\pm$ 0.09 | +        | Y = 4.039e5X - 7.491e6                            | 0.9996                                    |
|    |                      | 20.18 $\pm$ 0.16        | 20.18 $\pm$ 0.08 | -        | Y = 2.407e5X + 5.281e6                            | 0.9966                                    |
| 6  | Diflubenzuron        | 14.99 $\pm$ 0.11        | 14.93 $\pm$ 0.12 | +        | Y = 3.384e5X + 1.912e6                            | 0.9969                                    |
|    |                      | 14.76 $\pm$ 0.13        | 14.73 $\pm$ 0.24 | -        | Y = 2.117e5X + 6.647e6                            | 0.9974                                    |
| 7  | Carbaryl             | 9.47 $\pm$ 0.28         | 9.43 $\pm$ 0.10  | +        | Y = 2.276e6X + 4.913e7                            | 0.9976                                    |
| 8  | Carbofuran           | 8.03 $\pm$ 0.18         | 7.99 $\pm$ 0.17  | +        | Y = 1.557e7X + 8.567e7                            | 0.9989                                    |
| 9  | Methomyl             | 4.58 $\pm$ 0.23         | 4.27 $\pm$ 0.25  | +        | Y = 8.082e5X + 3.096e6                            | 0.9987                                    |
| 10 | Niclosamide          | 18.67 $\pm$ 0.14        | 18.67 $\pm$ 0.13 | -        | Y = 1.872e6X + 1.266e7                            | 0.9968                                    |
| 11 | Tebufenozide         | 14.68 $\pm$ 0.14        | 14.63 $\pm$ 0.18 | +        | Y = 1.234e6X + 1.836e7                            | 0.9943                                    |
|    |                      | 14.48 $\pm$ 0.16        | 14.45 $\pm$ 0.25 | -        | Y = 1.501e5X + 2.343e6                            | 0.9913                                    |
| 12 | Pendimethalin        | 18.64 $\pm$ 0.21        | 18.58 $\pm$ 0.13 | +        | Y = 6.565e5X - 6.168e6                            | 0.9987                                    |
| 13 | Prochloraz           | 16.34 $\pm$ 0.14        | 16.28 $\pm$ 0.12 | +        | Y = 1.816e6X + 2.296e7                            | 0.9927                                    |
| 14 | Clomazone            | 11.44 $\pm$ 0.20        | 11.40 $\pm$ 0.13 | +        | Y = 6.398e6X + 5.009e7                            | 0.9974                                    |
| 15 | Dinotefuran          | 3.87 $\pm$ 0.19         | 3.72 $\pm$ 0.43  | -        | Y = 3.015e5X + 3.434e6                            | 0.9983                                    |
| 16 | Imidacloprid         | 5.76 $\pm$ 0.26         | 5.74 $\pm$ 0.09  | +        | Y = 2.356e6X + 1.18e7                             | 0.9972                                    |
| 17 | Pentachlorophenol    | 17.50 $\pm$ 0.08        | 17.49 $\pm$ 0.16 | -        | Y = 1.402e5X + 6.331e7                            | 0.9954                                    |
| 18 | Diazinon             | 15.40 $\pm$ 0.15        | 15.35 $\pm$ 0.16 | +        | Y = 1.294e7X + 4.064e8                            | 0.9951                                    |
| 19 | Dimethoate           | 5.67 $\pm$ 0.30         | 5.65 $\pm$ 0.13  | +        | Y = 1.716e7X + 4.219e8                            | 0.9955                                    |
| 20 | Phenthoate           | 15.25 $\pm$ 0.14        | 15.20 $\pm$ 0.15 | +        | Y = 3.72e6X + 6.293e7                             | 0.9943                                    |
| 21 | Profenofos           | 16.93 $\pm$ 0.18        | 16.89 $\pm$ 0.07 | +        | Y = 1.938e6X + 3.319e7                            | 0.9976                                    |
| 22 | Quinalphos           | 14.97 $\pm$ 0.12        | 14.92 $\pm$ 0.14 | +        | Y = 5.374e6X + 6.676e7                            | 0.9974                                    |
| 23 | Triazophos           | 13.93 $\pm$ 0.12        | 13.88 $\pm$ 0.20 | +        | Y = 2.091e7X + 8.225e8                            | 0.9904                                    |
| 24 | Trichlorfon          | 5.20 $\pm$ 0.24         | 5.18 $\pm$ 0.14  | +        | Y = 1.288e6X + 2.828e6                            | 0.9985                                    |
| 25 | Dichlorvos           | 8.19 $\pm$ 0.20         | 8.15 $\pm$ 0.14  | +        | Y = 6.509e5X - 2.636e6                            | 0.9999                                    |
| 26 | Parathion-methyl     | 6.56 $\pm$ 0.28         | 6.56 $\pm$ 0.20  | -        | Y = 4.215e4X + 7.874e5                            | 0.9977                                    |
| 27 | Indoxacarb           | 18.15 $\pm$ 0.26        | 18.10 $\pm$ 0.14 | +        | Y = 7.002e5X - 2.547e6                            | 1.0000                                    |
| 28 | Oxadiazon            | 15.97 $\pm$ 0.18        | 15.92 $\pm$ 0.16 | +        | Y = 2.326e5X - 4.047e5                            | 0.9996                                    |
| 29 | Oxadiazon            | 17.91 $\pm$ 0.18        | 17.86 $\pm$ 0.10 | +        | Y = 4.14e5X - 1.557e6                             | 0.9999                                    |
| 30 | Linuron              | 12.77 $\pm$ 0.14        | 12.71 $\pm$ 0.11 | +        | Y = 1.362e6X + 2.263e7                            | 0.9981                                    |
| 31 | Diuron               | 11.28 $\pm$ 0.20        | 11.23 $\pm$ 0.13 | +        | Y = -1.915e2e2X <sup>2</sup> + 4.166e6X + 5.552e8 | 0.9991                                    |
|    |                      | 11.03 $\pm$ 0.23        | 11.01 $\pm$ 0.28 | -        | Y = 6.225e4X + 8.543e6                            | 0.9958                                    |
| 32 | Fipronil             | 16.39 $\pm$ 0.16        | 16.38 $\pm$ 0.16 | -        | Y = 1.314e6X + 2.509e7                            | 0.9937                                    |
| 33 | Fludioxonil          | 13.98 $\pm$ 0.18        | 13.96 $\pm$ 0.20 | -        | Y = 2.602e6X + 8.479e7                            | 0.9943                                    |
| 34 | Fenitrothion         | 13.38 $\pm$ 0.07        | 13.32 $\pm$ 0.28 | +        | Y = 2.313e4X + 5.448e5                            | 0.9945                                    |
| 35 | Pyridalyl            | 22.23 $\pm$ 0.04        | 22.26 $\pm$ 0.17 | +        | Y = 1.019e6X + 1.496e6                            | 0.9995                                    |
| 36 | Pyribenzoxim         | 18.32 $\pm$ 0.28        | 18.24 $\pm$ 0.14 | +        | Y = 1.107e6X + 4.023e6                            | 0.9992                                    |
| 37 | Pyridaben            | 19.54 $\pm$ 0.09        | 19.51 $\pm$ 0.09 | +        | Y = 2.855e6X + 6.367e6                            | 0.9993                                    |
| 38 | Pyriproxyfen         | 17.79 $\pm$ 0.29        | 17.75 $\pm$ 0.10 | +        | Y = 8.016e6X + 3.136e7                            | 0.9980                                    |
| 39 | Rotenone             | 15.10 $\pm$ 0.11        | 15.05 $\pm$ 0.16 | +        | Y = 1.365e6X + 9.923e6                            | 0.9969                                    |
| 40 | Azoxystrobin         | 13.49 $\pm$ 0.06        | 13.44 $\pm$ 0.25 | +        | Y = 1.503e7X + 8.688e7                            | 0.9980                                    |
| 41 | Picoxystrobin        | 15.54 $\pm$ 0.16        | 15.49 $\pm$ 0.16 | +        | Y = 3.452e6X + 3.184e7                            | 0.9987                                    |
| 42 | Trifloxystrobin      | 17.56 $\pm$ 0.33        | 17.47 $\pm$ 0.08 | +        | Y = 7.643e6X + 9.536e7                            | 0.9968                                    |
| 43 | Cinosulfuron         | 9.94 $\pm$ 0.29         | 9.91 $\pm$ 0.15  | +        | Y = 2.929e6X - 4.774e6                            | 0.9902                                    |
|    |                      | 9.70 $\pm$ 0.21         | 9.68 $\pm$ 0.09  | -        | Y = 4.787e4X + 3.746e5                            | 0.9971                                    |
| 44 | Metsulfuron methyl   | 11.02 $\pm$ 0.21        | 10.98 $\pm$ 0.18 | +        | Y = 1.003e6X - 1.197e6                            | 0.9997                                    |
|    |                      | 10.77 $\pm$ 0.27        | 10.75 $\pm$ 0.20 | -        | Y = 3.095e4X + 2.316e7                            | 0.9986                                    |
| 45 | Pyrazosulfuron Ethyl | 14.86 $\pm$ 0.29        | 14.77 $\pm$ 0.12 | +        | Y = 7.7e5X - 2.245e7                              | 0.9984                                    |
|    |                      | 14.59 $\pm$ 0.21        | 14.56 $\pm$ 0.24 | -        | Y = 9.211e0X <sup>2</sup> - 6.743e3X + 5.705e5    | 0.9960                                    |
| 46 | Fentrazamide         | 15.77 $\pm$ 0.16        | 15.72 $\pm$ 0.18 | +        | Y = 3.233e6X + 1.416e7                            | 0.9960                                    |
| 47 | Cyproconazole        | 12.92 $\pm$ 0.09        | 12.87 $\pm$ 0.14 | +        | Y = 3.601e6X + 1.177e7                            | 0.9997                                    |
| 48 | Difenoconazole       | 17.11 $\pm$ 0.26        | 17.06 $\pm$ 0.10 | +        | Y = 1.038e6X + 2.965e8                            | 0.9957                                    |
| 49 | Propiconazole        | 15.49 $\pm$ 0.19        | 15.44 $\pm$ 0.15 | +        | Y = 7.542e5X + 1.068e7                            | 0.9905                                    |

| No | Compound name    | RT $\pm$ RSD, min (n=6) |                  | Polarity | Regression equation    | Correlation coefficient (R <sup>2</sup> ) |
|----|------------------|-------------------------|------------------|----------|------------------------|-------------------------------------------|
|    |                  | solvent                 | Matrix- match    |          |                        |                                           |
| 50 | Penoxsulam       | 11.55 $\pm$ 1.12        | 11.46 $\pm$ 0.14 | +        | Y = 1.773e6X + 8.768e5 | 0.9996                                    |
| 51 | Bromadiolone     | 17.63 $\pm$ 0.09        | 17.63 $\pm$ 0.17 | -        | Y = 3.446e5X + 5.128e7 | 0.9926                                    |
| 52 | Gibberellic acid | 5.55 $\pm$ 0.25         | 5.53 $\pm$ 0.15  | -        | Y = 5.568e4X + 1.06e6  | 0.9994                                    |
| 53 | Spinosad A       | 19.27 $\pm$ 0.15        | 19.25 $\pm$ 0.12 | +        | Y = 2.227e6X + 1.639e7 | 0.9967                                    |
|    | Spinosad D       | 19.91 $\pm$ 0.13        | 19.91 $\pm$ 0.14 | +        | Y = 7.59e5X - 9.484e6  | 0.9993                                    |

Table S3. Analytical figures of merit of the UPLC- Q Exactive Orbitrap MS method for pesticide analysis.

| No. | Compound name           | Precursor theoretical<br>(polarity) | RT $\pm$ RSD, min (n=6) |                  | ng/g |      | pg   |      |
|-----|-------------------------|-------------------------------------|-------------------------|------------------|------|------|------|------|
|     |                         |                                     | solvent                 | Match matrix     | LOD  | LOQ  | MDL* | MQL* |
| 1   | Fenoxaprop-P-Ethyl      | 362.0790 (+)                        | 17.70 $\pm$ 0.27        | 17.66 $\pm$ 0.09 | 0.04 | 0.13 | 0.2  | 0.7  |
| 2   | Fenoxanil               | 329.0818 (+)                        | 15.12 $\pm$ 0.09        | 15.06 $\pm$ 0.15 | 0.08 | 0.27 | 0.4  | 1.3  |
| 3   | Chlorantraniliprole     | 481.9781 (+)                        | 11.5 $\pm$ 0.18         | 11.47 $\pm$ 0.15 | 0.21 | 0.70 | 1.1  | 3.5  |
| 4   | Fluopicolide            | 382.9727 (+)                        | 13.40 $\pm$ 0.05        | 13.35 $\pm$ 0.21 | 0.02 | 0.07 | 0.1  | 0.3  |
| 5   | Chlorfluazuron          | 539.9702 (+)                        | 20.34 $\pm$ 0.09        | 20.34 $\pm$ 0.09 | 0.19 | 0.63 | 1.0  | 3.2  |
|     |                         | 537.9557 (-)                        | 20.18 $\pm$ 0.16        | 20.18 $\pm$ 0.08 | 0.07 | 0.23 | 0.4  | 1.2  |
| 6   | Diflubenzuron           | 311.0393 (+)                        | 14.99 $\pm$ 0.11        | 14.93 $\pm$ 0.12 | 0.17 | 0.57 | 0.9  | 2.8  |
|     |                         | 309.0248 (-)                        | 14.76 $\pm$ 0.13        | 14.73 $\pm$ 0.24 | 0.36 | 1.20 | 1.8  | 6.0  |
| 7   | Carbaryl                | 202.0862 (+)                        | 9.47 $\pm$ 0.28         | 9.43 $\pm$ 0.10  | 0.26 | 0.87 | 1.3  | 4.3  |
| 8   | Carbofuran              | 222.1125 (+)                        | 8.03 $\pm$ 0.18         | 7.99 $\pm$ 0.17  | 0.09 | 0.30 | 0.5  | 1.5  |
| 9   | Methomyl                | 163.0536 (+)                        | 4.58 $\pm$ 0.23         | 4.27 $\pm$ 0.25  | 0.43 | 1.43 | 2.2  | 7.2  |
| 10  | Niclosamide             | 324.9788 (-)                        | 18.67 $\pm$ 0.14        | 18.67 $\pm$ 0.13 | 0.04 | 0.13 | 0.2  | 0.7  |
| 11  | Tebufenozide            | 353.2224 (+)                        | 14.68 $\pm$ 0.14        | 14.63 $\pm$ 0.18 | 0.11 | 0.37 | 0.6  | 1.8  |
|     |                         | 351.2078 (-)                        | 14.48 $\pm$ 0.16        | 14.45 $\pm$ 0.25 | 0.13 | 0.43 | 0.7  | 2.2  |
| 12  | Pendimethalin           | 282.1448 (+)                        | 18.64 $\pm$ 0.21        | 18.58 $\pm$ 0.13 | 0.36 | 1.20 | 1.8  | 6.0  |
| 13  | Prochloraz              | 376.0381 (+)                        | 16.34 $\pm$ 0.14        | 16.28 $\pm$ 0.12 | 0.25 | 0.83 | 1.3  | 4.2  |
| 14  | Clomazone               | 240.0786 (+)                        | 11.44 $\pm$ 0.20        | 11.40 $\pm$ 0.13 | 0.10 | 0.33 | 0.5  | 1.7  |
| 15  | Dinotefuran             | 201.0993 (-)                        | 3.87 $\pm$ 0.19         | 3.72 $\pm$ 0.43  | 0.24 | 0.80 | 1.2  | 4.0  |
| 16  | Imidacloprid            | 256.0596 (+)                        | 5.76 $\pm$ 0.26         | 5.74 $\pm$ 0.09  | 0.86 | 2.87 | 4.3  | 14.3 |
| 17  | Pentachlorophenol       | 262.8397 (-)                        | 17.50 $\pm$ 0.08        | 17.49 $\pm$ 0.16 | 0.34 | 1.13 | 1.7  | 5.7  |
| 18  | Diazinon                | 305.1083 (+)                        | 15.40 $\pm$ 0.15        | 15.35 $\pm$ 0.16 | 0.05 | 0.17 | 0.3  | 0.8  |
| 19  | Dimethoate              | 230.0069 (+)                        | 5.67 $\pm$ 0.30         | 5.65 $\pm$ 0.13  | 0.17 | 0.57 | 0.9  | 2.8  |
| 20  | Phenthoate              | 321.0379 (+)                        | 15.25 $\pm$ 0.14        | 15.20 $\pm$ 0.15 | 0.05 | 0.17 | 0.3  | 0.8  |
| 21  | Profenofos              | 372.9424 (+)                        | 16.93 $\pm$ 0.18        | 16.89 $\pm$ 0.07 | 0.15 | 0.50 | 0.8  | 2.5  |
| 22  | Quinalphos              | 299.0614 (+)                        | 14.97 $\pm$ 0.12        | 14.92 $\pm$ 0.14 | 0.05 | 0.17 | 0.3  | 0.8  |
| 23  | Triazophos              | 314.0723 (+)                        | 13.93 $\pm$ 0.12        | 13.88 $\pm$ 0.20 | 0.01 | 0.03 | 0.1  | 0.2  |
| 24  | Trichlorfon             | 256.9298 (+)                        | 5.20 $\pm$ 0.24         | 5.18 $\pm$ 0.14  | 0.21 | 0.70 | 1.1  | 3.5  |
| 25  | Dichlorvos              | 220.9532 (+)                        | 8.19 $\pm$ 0.20         | 8.15 $\pm$ 0.14  | 0.25 | 0.83 | 1.3  | 4.2  |
| 26  | Parathion-methyl        | 261.9944 (-)                        | 6.56 $\pm$ 0.28         | 6.56 $\pm$ 0.20  | 0.28 | 0.93 | 1.4  | 4.7  |
| 27  | Indoxacarb              | 528.078 (+)                         | 18.15 $\pm$ 0.26        | 18.10 $\pm$ 0.14 | 0.10 | 0.33 | 0.5  | 1.7  |
| 28  | Oxadiazyl               | 341.0454 (+)                        | 15.97 $\pm$ 0.18        | 15.92 $\pm$ 0.16 | 0.23 | 0.77 | 1.2  | 3.8  |
| 29  | Oxadiazon               | 345.0767 (+)                        | 17.91 $\pm$ 0.18        | 17.86 $\pm$ 0.10 | 0.13 | 0.43 | 0.7  | 2.2  |
| 30  | Linuron                 | 249.0192 (+)                        | 12.77 $\pm$ 0.14        | 12.71 $\pm$ 0.11 | 0.18 | 0.60 | 0.9  | 3.0  |
| 31  | Diuron                  | 233.0243 (+)                        | 11.28 $\pm$ 0.20        | 11.23 $\pm$ 0.13 | 0.15 | 0.50 | 0.8  | 2.5  |
|     |                         | 231.0097 (-)                        | 11.03 $\pm$ 0.23        | 11.01 $\pm$ 0.28 | 0.15 | 0.50 | 0.8  | 2.5  |
| 32  | Fipronil                | 434.9314 (-)                        | 16.39 $\pm$ 0.16        | 16.38 $\pm$ 0.16 | 0.03 | 0.10 | 0.2  | 0.5  |
| 33  | Fludioxonil             | 247.0324 (-)                        | 13.98 $\pm$ 0.18        | 13.96 $\pm$ 0.20 | 0.03 | 0.10 | 0.2  | 0.5  |
| 34  | Fenitrothion            | 278.0246 (+)                        | 13.38 $\pm$ 0.07        | 13.32 $\pm$ 0.28 | 0.81 | 2.70 | 4.1  | 13.5 |
| 35  | Pyridalyl               | 489.9753 (+)                        | 22.23 $\pm$ 0.04        | 22.26 $\pm$ 0.17 | 0.21 | 0.70 | 1.1  | 3.5  |
| 36  | Pyribenzoxim            | 610.1932 (+)                        | 18.32 $\pm$ 0.28        | 18.24 $\pm$ 0.14 | 0.12 | 0.40 | 0.6  | 2.0  |
| 37  | Pyridaben               | 365.1449 (+)                        | 19.54 $\pm$ 0.09        | 19.51 $\pm$ 0.09 | 0.09 | 0.30 | 0.5  | 1.5  |
| 38  | Pyriproxyfen            | 322.1438 (+)                        | 17.79 $\pm$ 0.29        | 17.75 $\pm$ 0.10 | 0.05 | 0.17 | 0.3  | 0.8  |
| 39  | Rotenone                | 395.1489 (+)                        | 15.10 $\pm$ 0.11        | 15.05 $\pm$ 0.16 | 0.46 | 1.53 | 2.3  | 7.7  |
| 40  | Azoxystrobin            | 404.1241 (+)                        | 13.49 $\pm$ 0.06        | 13.44 $\pm$ 0.25 | 0.02 | 0.07 | 0.1  | 0.3  |
| 41  | Picoxystrobin           | 368.1104 (+)                        | 15.54 $\pm$ 0.16        | 15.49 $\pm$ 0.16 | 0.09 | 0.30 | 0.5  | 1.5  |
| 42  | Trifloxystrobin         | 409.137 (+)                         | 17.56 $\pm$ 0.33        | 17.47 $\pm$ 0.08 | 0.03 | 0.10 | 0.2  | 0.5  |
| 43  | Cinosulfuron            | 414.1078 (+)                        | 9.94 $\pm$ 0.29         | 9.91 $\pm$ 0.15  | 0.43 | 1.43 | 2.2  | 7.2  |
|     |                         | 412.0932 (-)                        | 9.70 $\pm$ 0.21         | 9.68 $\pm$ 0.09  | 0.25 | 0.83 | 1.3  | 4.2  |
| 44  | Metsulfuron methyl      | 382.0816 (+)                        | 11.02 $\pm$ 0.21        | 10.98 $\pm$ 0.18 | 0.13 | 0.43 | 0.7  | 2.2  |
|     |                         | 380.067 (-)                         | 10.77 $\pm$ 0.27        | 10.75 $\pm$ 0.20 | 0.85 | 2.83 | 4.3  | 14.2 |
| 45  | Pyrazosulfuron<br>Ethyl | 415.103 (+)                         | 14.86 $\pm$ 0.29        | 14.77 $\pm$ 0.12 | 0.21 | 0.70 | 1.1  | 3.5  |
|     |                         | 413.0885 (-)                        | 14.59 $\pm$ 0.21        | 14.56 $\pm$ 0.24 | 0.08 | 0.27 | 0.4  | 1.3  |
| 46  | Fentrazamide            | 350.1378 (+)                        | 15.77 $\pm$ 0.16        | 15.72 $\pm$ 0.18 | 0.10 | 0.33 | 0.5  | 1.7  |
| 47  | Cyproconazole           | 292.1211 (+)                        | 12.92 $\pm$ 0.09        | 12.87 $\pm$ 0.14 | 0.48 | 1.60 | 2.4  | 8.0  |
| 48  | Difenoconazole          | 406.0720 (+)                        | 17.11 $\pm$ 0.26        | 17.06 $\pm$ 0.10 | 0.26 | 0.87 | 1.3  | 4.3  |
| 49  | Propiconazole           | 342.0770 (+)                        | 15.49 $\pm$ 0.19        | 15.44 $\pm$ 0.15 | 0.35 | 1.17 | 1.8  | 5.8  |



| No. | Compound name    | Precursor theoretical<br>(polarity) | RT $\pm$ RSD, min (n=6) |                  | ng/g |      | pg   |      |
|-----|------------------|-------------------------------------|-------------------------|------------------|------|------|------|------|
|     |                  |                                     | sovent                  | Match matrix     | LOD  | LOQ  | MDL* | MQL* |
| 50  | Penoxsulam       | 484.0708 (+)                        | 11.55 $\pm$ 1.12        | 11.46 $\pm$ 0.14 | 0.03 | 0.10 | 0.2  | 0.5  |
| 51  | Bromadiolone     | 525.0707 (-)                        | 17.63 $\pm$ 0.09        | 17.63 $\pm$ 0.17 | 0.10 | 0.33 | 0.5  | 1.7  |
| 52  | Gibberellic acid | 345.1344 (-)                        | 5.55 $\pm$ 0.25         | 5.53 $\pm$ 0.15  | 0.69 | 2.30 | 3.5  | 11.5 |
| 53  | Spinosad A       | 732.4681 (+)                        | 19.27 $\pm$ 0.15        | 19.25 $\pm$ 0.12 | 0.25 | 0.83 | 1.3  | 4.2  |
|     | Spinosad D       | 746.4838 (+)                        | 19.91 $\pm$ 0.13        | 19.91 $\pm$ 0.14 | 0.24 | 0.80 | 1.2  | 4.0  |

\* absolute MDL and MQL are defined as amount of analyte that injected into LC column

Table S4a: Matrix effect, recovery of extraction and overall recovery of pesticides in pooled samples

| No | Compound name       | Category                                                  | Precursor theoretical<br>(polarity) | RT ± RSD, min (n=6) |                | ME ± RSD,<br>(n=6) | RE ± RSD,<br>(n=6),<br>% | R ± RSD,<br>(n=6) |
|----|---------------------|-----------------------------------------------------------|-------------------------------------|---------------------|----------------|--------------------|--------------------------|-------------------|
|    |                     |                                                           |                                     | solvent             | Matched matrix |                    |                          |                   |
| 1  | Fenoxaprop-P-Ethyl  | aryloxyphenoxypropionate                                  | 362.0790 (+)                        | 17.70 ± 0.27        | 17.66 ± 0.09   | 168.9 ± 7.3        | 67.4 ± 16.3              | 113.9 ± 17.9      |
| 2  | Fenoxanil           | amide                                                     | 329.0818 (+)                        | 15.12 ± 0.09        | 15.06 ± 0.15   | 136.3 ± 9.3        | 67.1 ± 13.5              | 91.5 ± 16.5       |
| 3  | Chlorantraniliprole | anthranilic diamide                                       | 481.9781 (+)                        | 11.5 ± 0.18         | 11.47 ± 0.15   | 114.7 ± 6.6        | 87.3 ± 4.4               | 99.9 ± 7.8        |
| 4  | Fluopicolide        | benzamide pyridine                                        | 382.9727 (+)                        | 13.40 ± 0.05        | 13.35 ± 0.21   | 136.2 ± 12.8       | 63.5 ± 16.2              | 86.5 ± 20.6       |
| 5  | Chlorfluazuron      | benzoylurea                                               | 539.9702 (+)                        | 20.34 ± 0.09        | 20.34 ± 0.09   | 179.9 ± 6.2        | 76.7 ± 8.3               | 137.8 ± 10.4      |
|    |                     |                                                           | 537.9557 (-)                        | 20.18 ± 0.16        | 20.18 ± 0.08   | 89.9 ± 8.1         | 78.8 ± 9.8               | 70.8 ± 12.7       |
| 6  | Diflubenzuron       | benzoylurea                                               | 311.0393 (+)                        | 14.99 ± 0.11        | 14.93 ± 0.12   | 163.4 ± 10.2       | 66.7 ± 7                 | 109 ± 12.3        |
|    |                     |                                                           | 309.0248 (-)                        | 14.76 ± 0.13        | 14.73 ± 0.24   | 93.7 ± 6.5         | 82.9 ± 7.8               | 77.7 ± 10.2       |
| 7  | Carbaryl            | carbamate                                                 | 202.0862 (+)                        | 9.47 ± 0.28         | 9.43 ± 0.10    | 118.8 ± 4.6        | 57.8 ± 22.1              | 78.5 ± 22.6       |
| 8  | Carbofuran          | carbamate                                                 | 222.1125 (+)                        | 8.03 ± 0.18         | 7.99 ± 0.17    | 97.1 ± 1.6         | 89.9 ± 7.4               | 87.3 ± 7.5        |
| 9  | Methomyl            | carbamate                                                 | 163.0536 (+)                        | 4.58 ± 0.23         | 4.27 ± 0.25    | 73.6 ± 7.2         | 69.8 ± 20.2              | 57.8 ± 21.5       |
| 10 | Niclosamide         | chloronitrophenol                                         | 324.9788 (-)                        | 18.67 ± 0.14        | 18.67 ± 0.13   | 104.9 ± 7.3        | 78.2 ± 5.7               | 82 ± 9.1          |
| 11 | Tebufenozide        | diacylhydrazine                                           | 353.2224 (+)                        | 14.68 ± 0.14        | 14.63 ± 0.18   | 121.1 ± 5.3        | 74.8 ± 15.9              | 90.6 ± 16.7       |
|    |                     |                                                           | 351.2078 (-)                        | 14.48 ± 0.16        | 14.45 ± 0.25   | 109.4 ± 7.3        | 83.1 ± 6.8               | 90.9 ± 10.0       |
| 12 | Pendimethalin       | dinitroaniline                                            | 282.1448 (+)                        | 18.64 ± 0.21        | 18.58 ± 0.13   | 92.9 ± 9.6         | 74.5 ± 18.2              | 69.2 ± 20.6       |
| 13 | Prochloraz          | imidazole                                                 | 376.0381 (+)                        | 16.34 ± 0.14        | 16.28 ± 0.12   | 123.7 ± 2.9        | 70.8 ± 7.4               | 87.6 ± 8.0        |
| 14 | Clomazone           | isoxazolidinone                                           | 240.0786 (+)                        | 11.44 ± 0.20        | 11.40 ± 0.13   | 120.4 ± 6.5        | 62.3 ± 20.5              | 84.1 ± 21.5       |
| 15 | Dinotefuran         | neonicotinoid                                             | 201.0993 (-)                        | 3.87 ± 0.19         | 3.72 ± 0.43    | 54.9 ± 5.5         | 73.5 ± 16.1              | 40.4 ± 17.1       |
| 16 | Imidacloprid        | neonicotinoid                                             | 256.0596 (+)                        | 5.76 ± 0.26         | 5.74 ± 0.09    | 100.4 ± 1.8        | 76.8 ± 10.1              | 77.1 ± 10.3       |
| 17 | Pentachlorophenol   | organochlorin- POPs<br>(persistent Organic<br>pollutants) | 262.8397 (-)                        | 17.50 ± 0.08        | 17.49 ± 0.16   | 98.3 ± 6.1         | 76.4 ± 7.3               | 75.1 ± 9.5        |
| 18 | Diazinon            | organophosphate                                           | 305.1083 (+)                        | 15.40 ± 0.15        | 15.35 ± 0.16   | 149.9 ± 12.9       | 73.8 ± 17.8              | 105.6 ± 22.0      |
| 19 | Dimethoate          | organophosphate                                           | 230.0069 (+)                        | 5.67 ± 0.30         | 5.65 ± 0.13    | 58.9 ± 6.4         | 64.4 ± 15.6              | 37.9 ± 16.8       |
| 20 | Phenthoate          | organophosphate                                           | 321.0379 (+)                        | 15.25 ± 0.14        | 15.20 ± 0.15   | 149.1 ± 4.4        | 64.6 ± 2.7               | 96.3 ± 5.0        |
| 21 | Profenofos          | organophosphate                                           | 372.9424 (+)                        | 16.93 ± 0.18        | 16.89 ± 0.07   | 182.8 ± 6.5        | 92.1 ± 2.6               | 168.3 ± 7.0       |
| 22 | Quinalphos          | organophosphate                                           | 299.0614 (+)                        | 14.97 ± 0.12        | 14.92 ± 0.14   | 129.5 ± 9.5        | 69.7 ± 9.3               | 90.3 ± 13.3       |
| 23 | Triazophos          | organophosphate                                           | 314.0723 (+)                        | 13.93 ± 0.12        | 13.88 ± 0.20   | 140.8 ± 4.5        | 51.0 ± 12.1              | 73 ± 12.9         |
| 24 | Trichlorfon         | organophosphate                                           | 256.9298 (+)                        | 5.20 ± 0.24         | 5.18 ± 0.14    | 147.9 ± 2.9        | 90.6 ± 2.5               | 134.1 ± 3.9       |
| 25 | Dichlorvos          | organophosphate                                           | 220.9532 (+)                        | 8.19 ± 0.20         | 8.15 ± 0.14    | 122.9 ± 2.5        | 73.4 ± 6.5               | 90.2 ± 7.0        |
| 26 | Parathion-methyl    | organophosphate                                           | 261.9944 (-)                        | 6.56 ± 0.28         | 6.56 ± 0.20    | 82.4 ± 4.5         | 81.6 ± 9.4               | 67.2 ± 10.4       |
| 27 | Indoxacarb          | oxadiazine                                                | 528.0780 (+)                        | 18.15 ± 0.26        | 18.10 ± 0.14   | 123.4 ± 5.6        | 84.9 ± 4.5               | 104.8 ± 7.1       |
| 28 | Oxadiazyl           | oxidiazole                                                | 341.0454 (+)                        | 15.97 ± 0.18        | 15.92 ± 0.16   | 177.4 ± 7.9        | 77.7 ± 10.3              | 137.8 ± 13.0      |
| 29 | Oxadiazon           | oxidiazole                                                | 345.0767 (+)                        | 17.91 ± 0.18        | 17.86 ± 0.10   | 151.5 ± 4.7        | 84.5 ± 2.6               | 128.3 ± 5.4       |
| 30 | Linuron             | phenylurea                                                | 249.0192 (+)                        | 12.77 ± 0.14        | 12.71 ± 0.11   | 151.9 ± 11.7       | 66.9 ± 11.6              | 100.9 ± 16.4      |
| 31 | Diuron              | phenylurea                                                | 233.0243 (+)                        | 11.28 ± 0.20        | 11.23 ± 0.13   | 88.5 ± 22.6        | 93.6 ± 16.5              | 86.9 ± 28.0       |
|    |                     |                                                           | 231.0097 (-)                        | 11.03 ± 0.23        | 11.01 ± 0.28   | 119 ± 9.1          | 76.1 ± 5.9               | 90.6 ± 10.8       |
| 32 | Fipronil            | phenylpyrazole                                            | 434.9314 (-)                        | 16.39 ± 0.16        | 16.38 ± 0.16   | 105.5 ± 9.2        | 82.7 ± 8.2               | 87.1 ± 12.3       |
| 33 | Fludioxonil         | phenylpyrazole                                            | 247.0324 (-)                        | 13.98 ± 0.18        | 13.96 ± 0.20   | 104.5 ± 7.8        | 78.1 ± 6                 | 81.5 ± 9.8        |
| 34 | Fenitrothion        | phosphorothioate                                          | 278.0246 (+)                        | 13.38 ± 0.07        | 13.32 ± 0.28   | 164.8 ± 14.7       | 60.4 ± 8.6               | 99.6 ± 16.9       |

| No | Compound name        | Category              | Precursor theoretical<br>(polarity) | RT ± RSD, min (n=6) |                | ME ± RSD,<br>(n=6) | RE ± RSD,<br>(n=6) | R ± RSD,<br>(n=6) |
|----|----------------------|-----------------------|-------------------------------------|---------------------|----------------|--------------------|--------------------|-------------------|
|    |                      |                       |                                     | solvent             | Matched matrix |                    |                    |                   |
| 35 | Pyridalyl            | pyridalyl             | 489.9753 (+)                        | 22.23 ± 0.04        | 22.26 ± 0.17   | 123.9 ± 4.5        | 73.8 ± 11.4        | 91.5 ± 12.3       |
| 36 | Pyribenzoxim         | pyrimidinyloxybenzoic | 610.1932 (+)                        | 18.32 ± 0.28        | 18.24 ± 0.14   | 88.5 ± 2.7         | 78.9 ± 3.7         | 69.8 ± 4.6        |
| 37 | Pyridaben            | pyridazinone          | 365.1449 (+)                        | 19.54 ± 0.09        | 19.51 ± 0.09   | 121 ± 8.7          | 72.4 ± 10.8        | 87.5 ± 13.8       |
| 38 | Pyriproxyfen         | pyridine-based        | 322.1438 (+)                        | 17.79 ± 0.29        | 17.75 ± 0.10   | 137.2 ± 12.2       | 66.4 ± 13.8        | 91 ± 18.3         |
| 39 | Rotenone             | rotenoid              | 395.1489 (+)                        | 15.10 ± 0.11        | 15.05 ± 0.16   | 152.8 ± 4.4        | 82.6 ± 7.2         | 126.5 ± 8.5       |
| 40 | Azoxystrobin         | strobilurin           | 404.1241 (+)                        | 13.49 ± 0.06        | 13.44 ± 0.25   | 140.2 ± 13.8       | 60.8 ± 11.4        | 85 ± 17.9         |
| 41 | Picoxystrobin        | strobilurin           | 368.1104 (+)                        | 15.54 ± 0.16        | 15.49 ± 0.16   | 130.1 ± 3.3        | 73.2 ± 8.9         | 95.1 ± 9.5        |
| 42 | Trifloxystrobin      | strobilurin           | 409.1370 (+)                        | 17.56 ± 0.33        | 17.47 ± 0.08   | 127.9 ± 14.8       | 76.5 ± 9.7         | 97.7 ± 17.7       |
| 43 | Cinosulfuron         | sulfonylurea          | 414.1078 (+)                        | 9.94 ± 0.29         | 9.91 ± 0.15    | 292.8 ± 4.3        | 68.1 ± 7.1         | 199.2 ± 8.3       |
|    |                      |                       | 412.0932 (-)                        | 9.70 ± 0.21         | 9.68 ± 0.09    | 196.4 ± 9.4        | 68.2 ± 8.6         | 134.1 ± 12.7      |
| 44 | Metsulfuron methyl   | sulfonylurea          | 382.0816 (+)                        | 11.02 ± 0.21        | 10.98 ± 0.18   | 157.3 ± 10.4       | 79.1 ± 7.7         | 124.5 ± 12.9      |
|    |                      |                       | 380.0670 (-)                        | 10.77 ± 0.27        | 10.75 ± 0.20   | 122.7 ± 8.2        | 76.5 ± 7.3         | 93.8 ± 11         |
| 45 | Pyrazosulfuron Ethyl | sulfonylurea          | 415.1030 (+)                        | 14.86 ± 0.29        | 14.77 ± 0.12   | 218.4 ± 1.1        | 93 ± 1.9           | 203.1 ± 2.2       |
|    |                      |                       | 413.0885 (-)                        | 14.59 ± 0.21        | 14.56 ± 0.24   | 190.1 ± 2.3        | 91.8 ± 1.5         | 174.6 ± 2.7       |
| 46 | Fentrazamide         | tetrazolinone         | 350.1378 (+)                        | 15.77 ± 0.16        | 15.72 ± 0.18   | 155.5 ± 11.7       | 66.2 ± 17.3        | 102.8 ± 20.8      |
| 47 | Cyproconazole        | triazole              | 292.1211 (+)                        | 12.92 ± 0.09        | 12.87 ± 0.14   | 142.5 ± 10.1       | 66.6 ± 18.7        | 94.9 ± 21.2       |
| 48 | Difenoconazole       | triazole              | 406.0720 (+)                        | 17.11 ± 0.26        | 17.06 ± 0.10   | 208 ± 8.3          | 73.1 ± 11.6        | 152.2 ± 14.2      |
| 49 | Propiconazole        | triazole              | 342.0770 (+)                        | 15.49 ± 0.19        | 15.44 ± 0.15   | 114.8 ± 14         | 72.5 ± 12.5        | 83.2 ± 18.8       |
| 50 | Penoxsulam           | triazopyrimidine      | 484.0708 (+)                        | 11.55 ± 1.12        | 11.46 ± 0.14   | 175.9 ± 2.5        | 75.9 ± 13.5        | 131.5 ± 13.7      |
| 51 | Bromadiolone         |                       | 525.0707 (-)                        | 17.63 ± 0.09        | 17.63 ± 0.17   | 196.5 ± 6.1        | 79.3 ± 7           | 155.8 ± 9.3       |
| 52 | Gibberellic acid     |                       | 345.1344 (-)                        | 5.55 ± 0.25         | 5.53 ± 0.15    | 50 ± 9.1           | 78.9 ± 14.4        | 39.4 ± 17.0       |
| 53 | Spinosad A           |                       | 732.4681 (+)                        | 19.27 ± 0.15        | 19.25 ± 0.12   | 113.3 ± 6.3        | 76.1 ± 11          | 86.2 ± 12.7       |
|    |                      |                       | 746.4838 (+)                        | 19.91 ± 0.13        | 19.91 ± 0.14   | 104.7 ± 8.5        | 84.6 ± 8.8         | 88.5 ± 12.2       |

Table S4b: Matrix effect, recovery of extraction and overall recovery of pesticides in three vegetable matrices (cabbage, white mustard and edible chrysanthemum)

| No | Compound name       | Category                  | [M ± H]<br>theoretical<br>(Polarity) | Cabbage      |             |              | Edible chrysanthemum |             |              | White mustard |             |              |
|----|---------------------|---------------------------|--------------------------------------|--------------|-------------|--------------|----------------------|-------------|--------------|---------------|-------------|--------------|
|    |                     |                           |                                      | ME ± RSD     | RE ± RSD    | R ± RSD      | ME ± RSD             | RE ± RSD    | R ± RSD      | ME ± RSD      | RE ± RSD    | R ± RSD      |
|    |                     |                           |                                      | (n=3), %     |             |              |                      |             |              |               |             |              |
| 1  | Fenoxaprop-P-Ethyl  | aryloxyphesnoxypropionate | 362.0790 (+)                         | 288.9 ± 4.06 | 52.5 ± 29.1 | 151.6 ± 29.1 | 256.7 ± 25.3         | 79.7 ± 7.84 | 204.6 ± 7.84 | 227.1 ± 4.00  | 82.2 ± 8.15 | 186.6 ± 8.15 |
| 2  | Fenoxanil           | amide                     | 329.0818 (+)                         | 165.3 ± 6.01 | 83.3 ± 0.13 | 137.6 ± 0.13 | 155.3 ± 13.8         | 78.8 ± 5.97 | 122.4 ± 5.97 | 137.9 ± 5.70  | 86.7 ± 2.60 | 119.5 ± 2.60 |
| 3  | Chlorantraniliprole | anthranilic diamide       | 481.9781 (+)                         | 189.0 ± 0.98 | 80.1 ± 0.64 | 151.3 ± 0.64 | 177.8 ± 10.8         | 83.9 ± 3.71 | 149.1 ± 3.71 | 97.2 ± 5.52   | 108 ± 8.92  | 105.4 ± 8.92 |
| 4  | Fluopicolide        | benzamide pyridine        | 382.9727 (+)                         | 226.0 ± 6.64 | 69.0 ± 2.64 | 155.9 ± 2.64 | 184.3 ± 1.31         | 92.5 ± 4.76 | 170.5 ± 4.76 | 132.1 ± 15.9  | 97.5 ± 1.03 | 128.8 ± 1.03 |
| 5  | Chlorfluazuron      | benzoylurea               | 539.9702 (+)                         | 206.9 ± 19.6 | 49.2 ± 7.94 | 101.7 ± 7.94 | 126.7 ± 14.1         | 86.2 ± 0.26 | 109.3 ± 0.26 | 161.8 ± 4.09  | 84.0 ± 2.46 | 135.9 ± 2.46 |
| 6  | Diflubenzuron       | benzoylurea               | 311.0393 (+)                         | 164.1 ± 8.65 | 70.1 ± 9.12 | 115.1 ± 9.12 | 191.9 ± 3.99         | 72.9 ± 7.95 | 140.0 ± 7.95 | 97.1 ± 4.56   | 111 ± 4.28  | 108.1 ± 4.28 |
| 7  | Carbaryl            | carbamate                 | 202.0862 (+)                         | 152.3 ± 3.60 | 81.1 ± 12.7 | 123.5 ± 12.7 | 123.6 ± 0.93         | 88.0 ± 3.85 | 108.7 ± 3.85 | 75.8 ± 18.5   | 112 ± 12.1  | 85.1 ± 12.1  |
| 8  | Carbofuran          | carbamate                 | 222.1125 (+)                         | 131.0 ± 0.94 | 75.9 ± 10.2 | 99.4 ± 10.2  | 166.3 ± 13.9         | 81.4 ± 1.85 | 135.4 ± 1.85 | 82.1 ± 4.20   | 104 ± 0.71  | 85.4 ± 0.71  |
| 9  | Methomyl            | carbamate                 | 163.0536 (+)                         | 149.2 ± 5.38 | 65.5 ± 16.4 | 97.7 ± 16.4  | 105.2 ± 10.9         | 97.6 ± 3.51 | 102.6 ± 3.51 | 94.2 ± 21.1   | 98.8 ± 4.02 | 93.1 ± 4.02  |
| 11 | Tebufenozide        | diacylhydrazine           | 353.2224 (+)                         | 264.6 ± 11.2 | 67.6 ± 24.5 | 179.0 24.5   | 209.2 ± 7.50         | 100 ± 6.01  | 210.0 ± 6.01 | 187.4 ± 7.11  | 83.7 ± 6.01 | 156.9 ± 6.01 |
| 12 | Pendimethalin       | dinitroaniline            | 282.1448 (+)                         | 263.4 ± 6.60 | 58.1 ± 19.5 | 153.1 ± 19.5 | 258.0 ± 0.19         | 78.5 ± 9.69 | 202.5 ± 9.69 | 251.8 ± 23.4  | 79.4 ± 0.70 | 199.9 ± 0.70 |
| 13 | Prochloraz          | imidazole                 | 376.0381 (+)                         | 263.6 ± 2.87 | 54.4 ± 25.1 | 143.4 ± 25.1 | 203.4 ± 1.05         | 77.8 ± 0.96 | 158.3 ± 0.96 | 202.2 ± 11.4  | 88.7 ± 7.29 | 179.2 ± 7.29 |
| 14 | Clomazone           | isoxazolidinone           | 240.0786 (+)                         | 192.3 ± 4.95 | 67.2 ± 1.25 | 129.3 ± 11.3 | 145.2 ± 5.44         | 92.9 ± 11.3 | 134.9 ± 11.3 | 92.5 ± 1.08   | 117 ± 2.24  | 108.3 ± 2.24 |
| 16 | Imidacloprid        | neonicotinoid             | 256.0596 (+)                         | 115.4 ± 13.2 | 82.2 ± 14.8 | 94.9 ± 14.8  | 99.8 ± 15.2          | 102 ± 10.0  | 102.3 ± 10.0 | 53.11 ± 21.2  | 111 ± 1.12  | 59.4 ± 1.12  |
| 18 | Diazinon            | organophosphate           | 305.1083 (+)                         | 322.6 ± 0.65 | 54.4 ± 14.8 | 175.4 ± 14.8 | 254.2 ± 17.4         | 89.6 ± 4.41 | 227.7 ± 4.41 | 189.3 ± 2.90  | 86.3 ± 7.96 | 163.5 ± 7.96 |
| 19 | Dimethoate          | organophosphate           | 230.0069 (+)                         | 115.2 ± 0.15 | 60.0 ± 1.66 | 69.1 ± 1.66  | 84.1 ± 0.30          | 96.9 ± 1.90 | 81.5 ± 1.90  | 53.95 ± 26.3  | 103 ± 1.42  | 55.43 ± 1.42 |
| 20 | Phenthoate          | organophosphate           | 321.0379 (+)                         | 271.1 ± 7.80 | 58.5 ± 15.2 | 158.7 ± 15.2 | 227.5 ± 10.4         | 95.6 ± 9.83 | 217.5 ± 9.83 | 191.8 ± 15.2  | 100 ± 3.48  | 192.3 ± 3.48 |
| 21 | Profenofos          | organophosphate           | 372.9424 (+)                         | 581.2 ± 8.54 | 55.2 ± 21.7 | 321.1 ± 21.7 | 465.1 ± 20.4         | 95.0 ± 6.46 | 441.8 ± 6.46 | 341.2 ± 38.6  | 125 ± 1.08  | 425.9 ± 1.08 |
| 22 | Quinalphos          | organophosphate           | 299.0614 (+)                         | 265.5 ± 4.85 | 64.7 ± 22.7 | 171.7 ± 22.7 | 245.7 ± 20.2         | 87.7 ± 9.08 | 215.5 ± 9.08 | 157.6 ± 9.58  | 111 ± 5.30  | 175.1 ± 5.30 |
| 23 | Triazophos          | organophosphate           | 314.0723 (+)                         | 356.5 ± 2.56 | 52.1 ± 16.3 | 185.6 ± 16.3 | 305.1 ± 27.7         | 90.5 ± 15.7 | 276.1 ± 15.7 | 163.0 ± 11.3  | 78.8 ± 15.6 | 128.4 ± 15.6 |
| 24 | Trichlorfon         | organophosphate           | 256.9298 (+)                         | 168.8 ± 1.39 | 86.7 ± 0.04 | 146.3 ± 0.04 | 168.9 ± 0.16         | 101 ± 2.75  | 170.4 ± 2.75 | 157.8 ± 6.11  | 91.9 ± 0.77 | 145.0 ± 0.77 |
| 25 | Dichlorvos          | organophosphate           | 220.9532 (+)                         | 120.8 ± 4.85 | 78.7 ± 0.82 | 95.0 ± 0.82  | 99.7 ± 0.64          | 90.0 ± 0.64 | 89.7 ± 0.64  | 109.8 ± 3.06  | 82.2 ± 2.29 | 90.3 ± 2.29  |
| 27 | Indoxacarb          | oxadiazine                | 528.078 (+)                          | 288.6 ± 5.46 | 58.7 ± 23.3 | 169.5 ± 23.3 | 225.5 ± 18.5         | 92.8 ± 5.86 | 209.3 ± 5.86 | 208.8 ± 0.45  | 92.6 ± 6.78 | 193.3 ± 6.78 |
| 28 | Oxadiazyl           | oxidiazole                | 341.0454 (+)                         | 257.6 ± 5.26 | 67.6 ± 23.7 | 174.1 ± 23.7 | 230.4 ± 19.9         | 92.2 ± 11.2 | 212.5 ± 11.2 | 202.5 ± 32.8  | 94.8 ± 4.34 | 192.1 ± 4.34 |
| 29 | Oxadiazon           | oxidiazole                | 345.0767 (+)                         | 320.7 ± 20.6 | 51.6 ± 23.9 | 165.6 ± 23.9 | 220.6 ± 19.6         | 92.0 ± 12.1 | 202.9 ± 12.1 | 214.8 ± 4.50  | 82.7 ± 10.1 | 177.6 ± 10.1 |
| 30 | Linuron             | phenylurea                | 249.0192 (+)                         | 214.1 ± 11.5 | 72.2 ± 9.5  | 154.6 ± 9.5  | 199.1 ± 8.21         | 81.0 ± 3.94 | 161.2 ± 3.94 | 130.7 ± 18.1  | 89.4 ± 0.10 | 116.9 ± 0.10 |

| No | Compound name        | Category              | [M ± H]<br>theoretical<br>(Polarity) | Cabbage      |              |              | Edible chrysanthemum |             |              | White mustard |             |              |
|----|----------------------|-----------------------|--------------------------------------|--------------|--------------|--------------|----------------------|-------------|--------------|---------------|-------------|--------------|
|    |                      |                       |                                      | ME ± RSD     | RE ± RSD     | R ± RSD      | ME ± RSD             | RE ± RSD    | R ± RSD      | ME ± RSD      | RE ± RSD    | R ± RSD      |
| 31 | Diuron               | phenylurea            | 233.0243 (+)                         | 169.9 ± 10.1 | 78.5 ± 14.9  | 133.3 ± 14.9 | 90.9 ± 4.74          | 93.3 ± 0.07 | 84.8 ± 0.07  | 65.25 ± 23.1  | 113 ± 10.9  | 74.2 ± 10.9  |
| 34 | Fenitrothion         | phosphorothioate      | 278.0246 (+)                         | 202.7 ± 8.02 | 79.8 ± 3.46  | 161.8 ± 3.46 | 92.8 54.7            | 115 ± 17.4  | 107.2 ± 17.4 | 134.1 ± 1.92  | 86.5 ± 7.65 | 116.0 ± 7.65 |
| 35 | Pyridalyl            | pyridalyl             | 489.9753 (+)                         | 284.3 ± 23.0 | 55.8 ± 23.2  | 158.6 ± 23.2 | 175.6 ± 19.3         | 90.9 13.5   | 159.6 13.5   | 182.2 ± 29.2  | 85.6 ± 8.24 | 156.0 ± 8.24 |
| 36 | Pyribenzoxim         | pyrimidinyloxybenzoic | 610.1932 (+)                         | 359.5 ± 27.2 | 56.6 ± 27.2  | 203.5 ± 27.2 | 255.2 ± 25.6         | 85.7 ± 2.10 | 218.8 ± 2.10 | 301.0 ± 1.00  | 75.5 ± 8.06 | 227.2 ± 8.06 |
| 37 | Pyridaben            | pyridazinone          | 365.1449 (+)                         | 336.3 ± 28.4 | 54.3 ± 28.8  | 182.7 ± 28.8 | 222.9 ± 29.1         | 86.8 ± 9.16 | 193.4 ± 9.16 | 296.6 ± 10.5  | 64.9 ± 7.17 | 192.4 ± 7.17 |
| 38 | Pymetrozine          | pyridine              | 218.1036 (+)                         | 85.4 ± 44.6  | 76.5 ± 1.50  | 65.3 ± 1.50  | 126.3 ± 23.7         | 65.4 ± 17.4 | 82.6 ± 17.4  | 77.03 ± 14.1  | 68.1 ± 11.7 | 52.5 ± 11.7  |
| 39 | Pyriproxyfen         | pyridine-based        | 322.1438 (+)                         | 302.7 ± 9.04 | 57.3 ± 23.3  | 173.5 ± 23.3 | 238.4 ± 25.6         | 92.0 ± 13.2 | 219.3 ± 13.2 | 236.4 ± 6.09  | 84.6 ± 8.80 | 200.0 ± 8.80 |
| 40 | Rotenone             | rotenoid              | 395.1489 (+)                         | 276.8 ± 10.7 | 66.2 ± 20.3  | 183.2 ± 20.3 | 268.4 ± 17.0         | 84.4 ± 11.0 | 226.6 ± 11.0 | 204.1 ± 7.40  | 107 ± 2.20  | 218.6 ± 2.20 |
| 41 | Azoxystrobin         | strobilurin           | 404.1241 (+)                         | 160.2 ± 18.8 | 100.2 ± 6.30 | 160.6 ± 6.24 | 209.6 ± 1.73         | 91.3 ± 10.3 | 191.4 ± 10.3 | 113.0 ± 0.93  | 94.3 ± 1.70 | 106.5 ± 1.70 |
| 42 | Picoxystrobin        | strobilurin           | 368.1104 (+)                         | 279.0 ± 3.64 | 60.4 ± 13.4  | 168.5 ± 13.4 | 217.6 ± 7.13         | 82.7 ± 1.18 | 180.0 ± 1.18 | 218.7 ± 9.38  | 86.4 ± 2.53 | 188.9 ± 2.53 |
| 43 | Trifloxystrobin      | strobilurin           | 409.137 (+)                          | 286.3 ± 2.83 | 58.4 ± 28.5  | 167.2 ± 28.5 | 230.8 ± 25.8         | 87.5 ± 6.90 | 202.0 ± 6.90 | 284.8 ± 17.5  | 74.2 ± 5.85 | 211.2 ± 5.85 |
| 44 | Cinosulfuron         | sulfonylurea          | 414.1078 (+)                         | 191.1 ± 6.07 | 83.6 ± 41.4  | 159.8 ± 41.4 | 200 ± 36.1           | 73.7 ± 31.9 | 147.6 ± 31.9 | 183.2 ± 0.00  | 80.0 ± 4.70 | 146.5 ± 4.70 |
| 45 | Metsulfuron methyl   | sulfonylurea          | 382.0816 (+)                         | 460.9 ± 2.12 | 63.8 ± 19.7  | 294.2 ± 19.7 | 260.0 ± 7.06         | 74.8 ± 6.38 | 194.6 ± 6.38 | 458.4 ± 17.4  | 104 ± 9.27  | 477.2 ± 9.27 |
| 46 | Pyrazosulfuron Ethyl | sulfonylurea          | 415.103 (+)                          | 2682 ± 3.73  | 85.1 ± 0.11  | 2282 ± 0.11  | 2953 ± 2.25          | 93.9 ± 0.16 | 2771 ± 0.16  | 2918 ± 2.29   | 99.6 ± 1.22 | 2907 ± 1.22  |
| 47 | Fentrazamide         | tetrazolinone         | 350.1378 (+)                         | 306.4 ± 2.59 | 60.0 ± 11.7  | 183.7 ± 11.7 | 265.1 ± 16.9         | 82.6 ± 3.41 | 219.0 ± 3.41 | 243.2 ± 2.62  | 73.9 ± 6.37 | 179.8 ± 6.37 |
| 48 | Cyproconazole        | triazole              | 292.1211 (+)                         | 193.7 ± 2.81 | 58.5 ± 7.16  | 113.3 ± 7.16 | 173.7 ± 15.3         | 90.6 ± 9.17 | 157.4 ± 9.17 | 107.0 ± 11.2  | 95.4 ± 3.65 | 102.1 ± 3.65 |
| 49 | Difenoconazole       | triazole              | 406.0720 (+)                         | 313.9 ± 3.68 | 47.4 ± 1.16  | 148.8 ± 1.16 | 205.5 ± 15.4         | 87.2 ± 13.4 | 179.1 ± 13.4 | 245.4 ± 4.25  | 71.9 ± 0.96 | 176.5 ± 0.96 |
| 50 | Propiconazole        | triazole              | 342.0770 (+)                         | 194.4 ± 4.69 | 60.2 ± 10.4  | 117.1 ± 10.4 | 161.4 ± 4.01         | 96.1 ± 4.30 | 155.1 ± 4.30 | 125.4 ± 34.3  | 119 ± 5.98  | 149.8 ± 5.98 |
| 53 | Spinosad A           |                       | 732.4681 (+)                         | 337.9 ± 28.8 | 47.9 ± 23.4  | 161.9 ± 23.4 | 227.3 ± 22.3         | 91.0 ± 12.2 | 206.8 ± 12.2 | 384.1 ± 32.4  | 46.1 ± 7.66 | 176.9 ± 7.66 |
|    | Spinosad D           |                       | 746.4838 (+)                         | 319.4 ± 28.2 | 52.7 ± 26.4  | 168.3 ± 26.4 | 224.5 ± 26.2         | 86.3 ± 13.6 | 193.7 ± 13.6 | 391.5 ± 34.9  | 44.4 ± 8.50 | 173.8 ± 8.50 |



| No | Compound name        | Chemical formula                                                               | RT ± rsd,<br>min (n=6)<br>solvent | Precursor<br>(Polarity) | Fragment 1                                                    |                    |            | Fragment 2       |                                                                                |                    |            |                  |
|----|----------------------|--------------------------------------------------------------------------------|-----------------------------------|-------------------------|---------------------------------------------------------------|--------------------|------------|------------------|--------------------------------------------------------------------------------|--------------------|------------|------------------|
|    |                      |                                                                                |                                   |                         | Formula                                                       | m/z<br>theoretical | m/z<br>exp | Mass<br>accuracy | Formula                                                                        | m/z<br>theoretical | m/z<br>exp | Mass<br>accuracy |
| 36 | Pyribenzoxim         | C <sub>32</sub> H <sub>27</sub> N <sub>5</sub> O <sub>8</sub>                  | 18.32 ± 0.28                      | 610.1932 (+)            | C <sub>19</sub> H <sub>17</sub> N <sub>4</sub> O <sub>7</sub> | 413.1097           | 413.1082   | -3.63            |                                                                                |                    |            |                  |
| 37 | Pyridaben            | C <sub>19</sub> H <sub>25</sub> ClN <sub>2</sub> OS                            | 19.54 ± 0.09                      | 365.1449 (+)            | C <sub>11</sub> H <sub>15</sub>                               | 147.1174           | 147.1166   | -5.44            | C <sub>15</sub> H <sub>18</sub> ClN <sub>2</sub> OS                            | 309.0828           | 309.0814   | -4.53            |
| 38 | Pyriproxyfen         | C <sub>20</sub> H <sub>19</sub> NO <sub>3</sub>                                | 17.79 ± 0.29                      | 322.1438 (+)            | C <sub>5</sub> H <sub>6</sub> NO                              | 96.0449            | 96.0447    | -2.08            | C <sub>15</sub> H <sub>15</sub> O <sub>2</sub>                                 | 227.1072           | 227.1065   | -3.08            |
| 39 | Rotenone             | C <sub>23</sub> H <sub>22</sub> O <sub>6</sub>                                 | 15.10 ± 0.11                      | 395.1489 (+)            | C <sub>14</sub> H <sub>13</sub> O <sub>2</sub>                | 213.0916           | 213.0906   | -4.69            | C <sub>11</sub> H <sub>12</sub> O <sub>3</sub>                                 | 192.0786           | 192.0778   | -4.16            |
| 40 | Azoxystrobin         | C <sub>22</sub> H <sub>17</sub> N <sub>3</sub> O <sub>5</sub>                  | 13.49 ± 0.06                      | 404.1241 (+)            | C <sub>21</sub> H <sub>14</sub> N <sub>3</sub> O <sub>4</sub> | 372.0984           | 372.0972   | -3.22            | C <sub>20</sub> H <sub>14</sub> N <sub>3</sub> O <sub>3</sub>                  | 344.1035           | 344.1024   | -3.20            |
| 41 | Picoxystrobin        | C <sub>18</sub> H <sub>16</sub> F <sub>3</sub> NO <sub>4</sub>                 | 15.54 ± 0.16                      | 368.1104 (+)            | C <sub>10</sub> H <sub>9</sub> O                              | 145.0653           | 145.0646   | -4.83            |                                                                                |                    |            |                  |
| 42 | Trifloxystrobin      | C <sub>20</sub> H <sub>19</sub> F <sub>3</sub> N <sub>2</sub> O <sub>4</sub>   | 17.56 ± 0.33                      | 409.137 (+)             | C <sub>9</sub> H <sub>7</sub> F <sub>3</sub> N                | 186.0530           | 186.0522   | -4.30            |                                                                                |                    |            |                  |
| 43 | Cinosulfuron         | C <sub>15</sub> H <sub>19</sub> N <sub>5</sub> O <sub>7</sub> S                | 9.94 ± 0.29                       | 414.1078 (+)            | C <sub>6</sub> H <sub>7</sub> N <sub>4</sub> O <sub>3</sub>   | 183.0518           | 183.0510   | -4.37            | C <sub>5</sub> H <sub>9</sub> N <sub>4</sub> O <sub>2</sub>                    | 157.0726           | 157.0718   | -5.09            |
| 44 | Metsulfuron methyl   | C <sub>14</sub> H <sub>15</sub> N <sub>5</sub> O <sub>6</sub> S                | 11.02 ± 0.21                      | 412.0932 (-)            | C <sub>5</sub> H <sub>7</sub> O <sub>2</sub> N <sub>4</sub>   | 155.0569           | 155.0565   | -2.58            |                                                                                |                    |            |                  |
| 45 | Pyrazosulfuron Ethyl | C <sub>14</sub> H <sub>18</sub> N <sub>6</sub> O <sub>7</sub> S                | 10.77 ± 0.27                      | 382.0816 (+)            | C <sub>6</sub> H <sub>7</sub> N <sub>4</sub> O <sub>2</sub>   | 167.0569           | 167.0562   | -4.19            | C <sub>8</sub> H <sub>7</sub> O <sub>2</sub>                                   | 135.0446           | 135.0439   | -5.18            |
| 46 | Fentrazamide         | C <sub>16</sub> H <sub>20</sub> ClN <sub>5</sub> O <sub>2</sub>                | 14.86 ± 0.29                      | 380.0670 (-)            | C <sub>5</sub> H <sub>7</sub> O <sub>4</sub>                  | 139.0620           | 139.0614   | -4.31            |                                                                                |                    |            |                  |
| 47 | Cyproconazole        | C <sub>16</sub> H <sub>20</sub> ClN <sub>5</sub> O <sub>2</sub>                | 15.77 ± 0.16                      | 415.1030 (+)            | C <sub>7</sub> H <sub>8</sub> N <sub>3</sub> O <sub>3</sub>   | 182.0566           | 182.0558   | -4.39            |                                                                                |                    |            |                  |
| 48 | Difenoconazole       | C <sub>15</sub> H <sub>18</sub> N <sub>6</sub> O <sub>7</sub> S                | 14.59 ± 0.21                      | 413.0885 (-)            | C <sub>6</sub> H <sub>8</sub> N <sub>3</sub> O <sub>2</sub>   | 154.0616           | 154.0613   | -1.95            |                                                                                |                    |            |                  |
| 49 | Propiconazole        | C <sub>16</sub> H <sub>20</sub> ClN <sub>5</sub> O <sub>2</sub>                | 15.77 ± 0.16                      | 350.1378 (+)            | C <sub>6</sub> H <sub>11</sub>                                | 83.0861            | 83.0859    | -2.41            |                                                                                |                    |            |                  |
| 50 | Penoxsulam           | C <sub>15</sub> H <sub>18</sub> ClN <sub>3</sub> O                             | 12.92 ± 0.09                      | 292.1211 (+)            | C <sub>2</sub> H <sub>4</sub> N <sub>3</sub>                  | 70.0405            | 70.0405    | 0.00             | C <sub>7</sub> H <sub>6</sub> Cl                                               | 125.0158           | 125.0153   | -4.00            |
| 51 | Bromadiolone         | C <sub>19</sub> H <sub>17</sub> Cl <sub>2</sub> N <sub>3</sub> O <sub>3</sub>  | 17.11 ± 0.26                      | 406.0720 (+)            | C <sub>13</sub> H <sub>9</sub> Cl <sub>2</sub> O              | 251.0030           | 251.0020   | -3.98            |                                                                                |                    |            |                  |
| 52 | Gibberellic acid     | C <sub>15</sub> H <sub>17</sub> Cl <sub>2</sub> N <sub>3</sub> O <sub>2</sub>  | 15.49 ± 0.19                      | 342.0770 (+)            | C <sub>7</sub> H <sub>5</sub> Cl <sub>2</sub>                 | 158.9768           | 158.9760   | -5.03            | C <sub>5</sub> H <sub>9</sub>                                                  | 69.0704            | 69.0704    | 0.00             |
| 53 | Spinosad A           | C <sub>16</sub> H <sub>14</sub> F <sub>5</sub> N <sub>5</sub> O <sub>5</sub> S | 11.55 ± 1.12                      | 484.0708 (+)            | C <sub>7</sub> H <sub>9</sub> O <sub>2</sub> N <sub>5</sub>   | 195.0756           | 195.0749   | -3.59            | C <sub>16</sub> H <sub>13</sub> O <sub>5</sub> N <sub>5</sub> F <sub>3</sub> S | 444.0589           | 444.0572   | -3.83            |
| 53 | Spinosad D           | C <sub>30</sub> H <sub>23</sub> BrO <sub>4</sub>                               | 17.63 ± 0.09                      | 525.0707 (-)            | C <sub>30</sub> H <sub>22</sub> BrO <sub>4</sub>              | 525.0701           | 525.0712   | 2.09             | C <sub>16</sub> H <sub>10</sub> O <sub>3</sub>                                 | 250.0630           | 250.0637   | 2.80             |
|    |                      | C <sub>19</sub> H <sub>22</sub> O <sub>6</sub>                                 | 5.55 ± 0.25                       | 345.1344 (-)            | C <sub>11</sub> H <sub>11</sub>                               | 143.0861           | 143.0855   | -4.19            |                                                                                |                    |            |                  |
|    |                      | C <sub>41</sub> H <sub>65</sub> NO <sub>10</sub>                               | 19.27 ± 0.15                      | 732.4681 (+)            | C <sub>8</sub> H <sub>16</sub> ON                             | 142.1232           | 142.1225   | -4.93            | C <sub>41</sub> H <sub>65</sub> NO <sub>10</sub>                               | 732.4681           | 732.4667   | -1.91            |
|    |                      | C <sub>42</sub> H <sub>67</sub> NO <sub>10</sub>                               | 19.91 ± 0.13                      | 746.4838 (+)            | C <sub>8</sub> H <sub>16</sub> ON                             | 142.1232           | 142.1225   | -4.93            | C <sub>42</sub> H <sub>67</sub> NO <sub>10</sub>                               | 746.4838           | 746.4819   | -2.55            |

Table S6. Short- and long-term stability of the analytical signal in standard solution and in matrix-match solution

| No. | Name                | Category                                            | Polarity     | RSD of analytical signal in standard solution |           | RSD of analytical signal in matrix match solution |           |
|-----|---------------------|-----------------------------------------------------|--------------|-----------------------------------------------|-----------|---------------------------------------------------|-----------|
|     |                     |                                                     |              | Short term                                    | Long term | Short term                                        | Long term |
| 1   | Fenoxaprop-P-Ethyl  | aryloxyphenoxypionate                               | 362.0790 (+) | 1.18                                          | 4.41      | 1.55                                              | 4.15      |
| 2   | Fenoxanil           | amide                                               | 329.0818 (+) | 0.55                                          | 6.38      | 1.22                                              | 4.58      |
| 3   | Chlorantraniliprole | anthranilic diamide                                 | 481.9781 (+) | 2.78                                          | 7.40      | 3.74                                              | 4.70      |
| 4   | Fluopicolide        | benzamide pyridine                                  | 382.9727 (+) | 0.78                                          | 4.94      | 1.21                                              | 4.84      |
| 5   | Chlorfluazuron      | benzoylurea                                         | 539.9702 (+) | 2.23                                          | 7.27      | 5.66                                              | 5.33      |
|     |                     |                                                     | 537.9557 (-) | 3.16                                          | 3.54      | 1.35                                              | 4.70      |
| 6   | Diflubenzuron       | benzoylurea                                         | 311.0393 (+) | 1.97                                          | 5.16      | 1.88                                              | 5.17      |
|     |                     |                                                     | 309.0248 (-) | 2.04                                          | 3.28      | 1.57                                              | 4.54      |
| 7   | Carbaryl            | carbamate                                           | 202.0862 (+) | 0.38                                          | 5.28      | 1.00                                              | 2.02      |
| 8   | Carbofuran          | carbamate                                           | 222.1125 (+) | 0.70                                          | 4.22      | 0.77                                              | 0.99      |
| 9   | Methomyl            | carbamate                                           | 163.0536 (+) | 0.20                                          | 4.18      | 2.42                                              | 4.15      |
| 10  | Niclosamide         | chloronitrophenol                                   | 324.9788 (-) | 2.37                                          | 4.09      | 3.07                                              | 5.22      |
| 11  | Tebufenozide        | diacylhydrazine                                     | 353.2224 (+) | 1.19                                          | 5.37      | 2.79                                              | 2.48      |
|     |                     |                                                     | 351.2078 (-) | 2.70                                          | 4.25      | 1.60                                              | 5.88      |
| 12  | Pendimethalin       | dinitroaniline                                      | 282.1448 (+) | 9.00                                          | 10.39     | 3.91                                              | 4.89      |
| 13  | Prochloraz          | imidazole                                           | 376.0381 (+) | 0.72                                          | 5.30      | 0.74                                              | 1.91      |
| 14  | Clomazone           | isoxazolidinone                                     | 240.0786 (+) | 2.90                                          | 5.60      | 0.27                                              | 2.89      |
| 15  | Dinotefuran         | neonicotinoid                                       | 201.0993 (-) | 2.98                                          | 4.44      | 2.09                                              | 2.97      |
| 16  | Imidacloprid        | neonicotinoid                                       | 256.0596 (+) | 1.80                                          | 9.81      | 0.56                                              | 0.71      |
| 17  | Pentachlorophenol   | organochlorin- POPs (persistent Organic pollutants) | 262.8397 (-) | 2.19                                          | 2.65      | 0.93                                              | 4.32      |
| 18  | Diazinon            | organophosphate                                     | 305.1083 (+) | 1.53                                          | 5.64      | 3.01                                              | 8.84      |
| 19  | Dimethoate          | organophosphate                                     | 230.0069 (+) | 2.75                                          | 5.50      | 1.50                                              | 2.93      |
| 20  | Phenthoate          | organophosphate                                     | 321.0379 (+) | 1.12                                          | 5.13      | 2.45                                              | 2.09      |
| 21  | Profenofos          | organophosphate                                     | 372.9424 (+) | 0.71                                          | 5.42      | 2.70                                              | 6.47      |
| 22  | Quinalphos          | organophosphate                                     | 299.0614 (+) | 0.66                                          | 5.50      | 5.15                                              | 4.26      |
| 23  | Triazophos          | organophosphate                                     | 314.0723 (+) | 1.26                                          | 4.84      | 1.07                                              | 1.65      |
| 24  | Trichlorfon         | organophosphate                                     | 256.9298 (+) | 1.98                                          | 2.08      | 9.15                                              | 8.48      |
| 25  | Dichlorvos          | organophosphate                                     | 220.9532 (+) | 4.84                                          | 5.94      | 1.55                                              | 2.05      |
| 26  | Parathion-methyl    | organophosphate                                     | 261.9944 (-) | 5.64                                          | 5.83      | 1.35                                              | 3.39      |
| 27  | Indoxacarb          | oxadiazine                                          | 528.078 (+)  | 1.37                                          | 6.26      | 6.48                                              | 5.46      |
| 28  | Oxadiazyl           | oxidiazole                                          | 341.0454 (+) | 1.85                                          | 6.05      | 1.81                                              | 5.96      |
| 29  | Oxadiazon           | oxidiazole                                          | 345.0767 (+) | 0.60                                          | 5.41      | 3.91                                              | 3.49      |
| 30  | Linuron             | phenylurea                                          | 249.0192 (+) | 3.14                                          | 5.45      | 4.14                                              | 6.84      |
| 31  | Diuron              | phenylurea                                          | 233.0243 (+) | 0.48                                          | 3.71      | 4.22                                              | 8.35      |
|     |                     |                                                     | 231.0097 (-) | 3.72                                          | 5.49      | 5.63                                              | 6.36      |
| 32  | Fipronil            | phenylpyrazole                                      | 434.9314 (-) | 4.03                                          | 5.17      | 0.48                                              | 7.15      |
| 33  | Fludioxonil         | phenylpyrazole                                      | 247.0324 (-) | 3.36                                          | 4.92      | 1.39                                              | 6.12      |
| 34  | Fenitrothion        | phosphorothioate                                    | 278.0246 (+) | 1.02                                          | 5.65      | 1.99                                              | 7.03      |
| 35  | Pyridalyl           | pyridalyl                                           | 489.9753 (+) | 2.11                                          | 6.25      | 1.01                                              | 2.69      |
| 36  | Pyribenzoxim        | pyrimidinylxybenzoic                                | 610.1932 (+) | 0.42                                          | 5.47      | 0.89                                              | 1.63      |
| 37  | Pyridaben           | pyridazinone                                        | 365.1449 (+) | 1.71                                          | 5.54      | 3.68                                              | 4.40      |



|    |                  |                  |              |      |       |      |      |
|----|------------------|------------------|--------------|------|-------|------|------|
| 38 | Pyriproxyfen     | pyridine-based   | 322.1438 (+) | 0.80 | 4.60  | 3.07 | 6.11 |
| 39 | Rotenone         | rotenoid         | 395.1489 (+) | 0.53 | 6.25  | 0.76 | 4.42 |
| 40 | Azoxystrobin     | strobilurin      | 404.1241 (+) | 0.96 | 5.78  | 1.17 | 6.31 |
| 41 | Picoxystrobin    | strobilurin      | 368.1104 (+) | 1.80 | 4.70  | 1.28 | 1.67 |
| 42 | Trifloxystrobin  | strobilurin      | 409.137 (+)  | 6.61 | 9.22  | 2.72 | 6.92 |
| 43 | Cinosulfuron     | sulfonylurea     | 414.1078 (+) | 0.88 | 7.63  | 1.35 | 3.38 |
|    | Metsulfuron      |                  | 412.0932 (-) | 2.10 | 2.99  | 4.22 | 7.74 |
| 44 | methyl           | sulfonylurea     | 382.0816 (+) | 1.80 | 8.30  | 2.68 | 4.57 |
|    | Pyrazosulfuron   |                  | 380.067 (-)  | 2.15 | 1.84  | 1.31 | 3.55 |
| 45 | Ethyl            | sulfonylurea     | 415.103 (+)  | 1.56 | 2.89  | 2.65 | 2.65 |
|    |                  |                  | 413.0885 (-) | 9.15 | 13.38 | 6.36 | 5.79 |
| 46 | Fentrazamide     | tetrazolinone    | 350.1378 (+) | 1.87 | 4.87  | 1.85 | 6.21 |
| 47 | Cyproconazole    | triazole         | 292.1211 (+) | 0.96 | 4.65  | 1.08 | 5.02 |
| 48 | Difenoconazole   | triazole         | 406.0720 (+) | 2.19 | 4.72  | 2.30 | 5.00 |
| 49 | Propiconazole    | triazole         | 342.0770 (+) | 1.77 | 5.48  | 2.96 | 5.37 |
| 50 | Penoxsulam       | triazopyrimidine | 484.0708 (+) | 2.34 | 9.58  | 1.9  | 2.04 |
| 51 | Bromadiolone     |                  | 525.0707 (-) | 8.16 | 10.21 | 1.92 | 3.16 |
| 52 | Gibberellic acid |                  | 345.1344 (-) | 0.44 | 3.57  | 0.45 | 5.77 |
|    | Spinosad A       |                  | 732.4681 (+) | 1.53 | 5.08  | 3.89 | 4.39 |
| 53 | Spinosad D       |                  | 746.4838 (+) | 2.90 | 6.54  | 3.97 | 8.47 |

Fig. S1. The total ion chromatogram of the target analytes in the standard solution (positive mode)

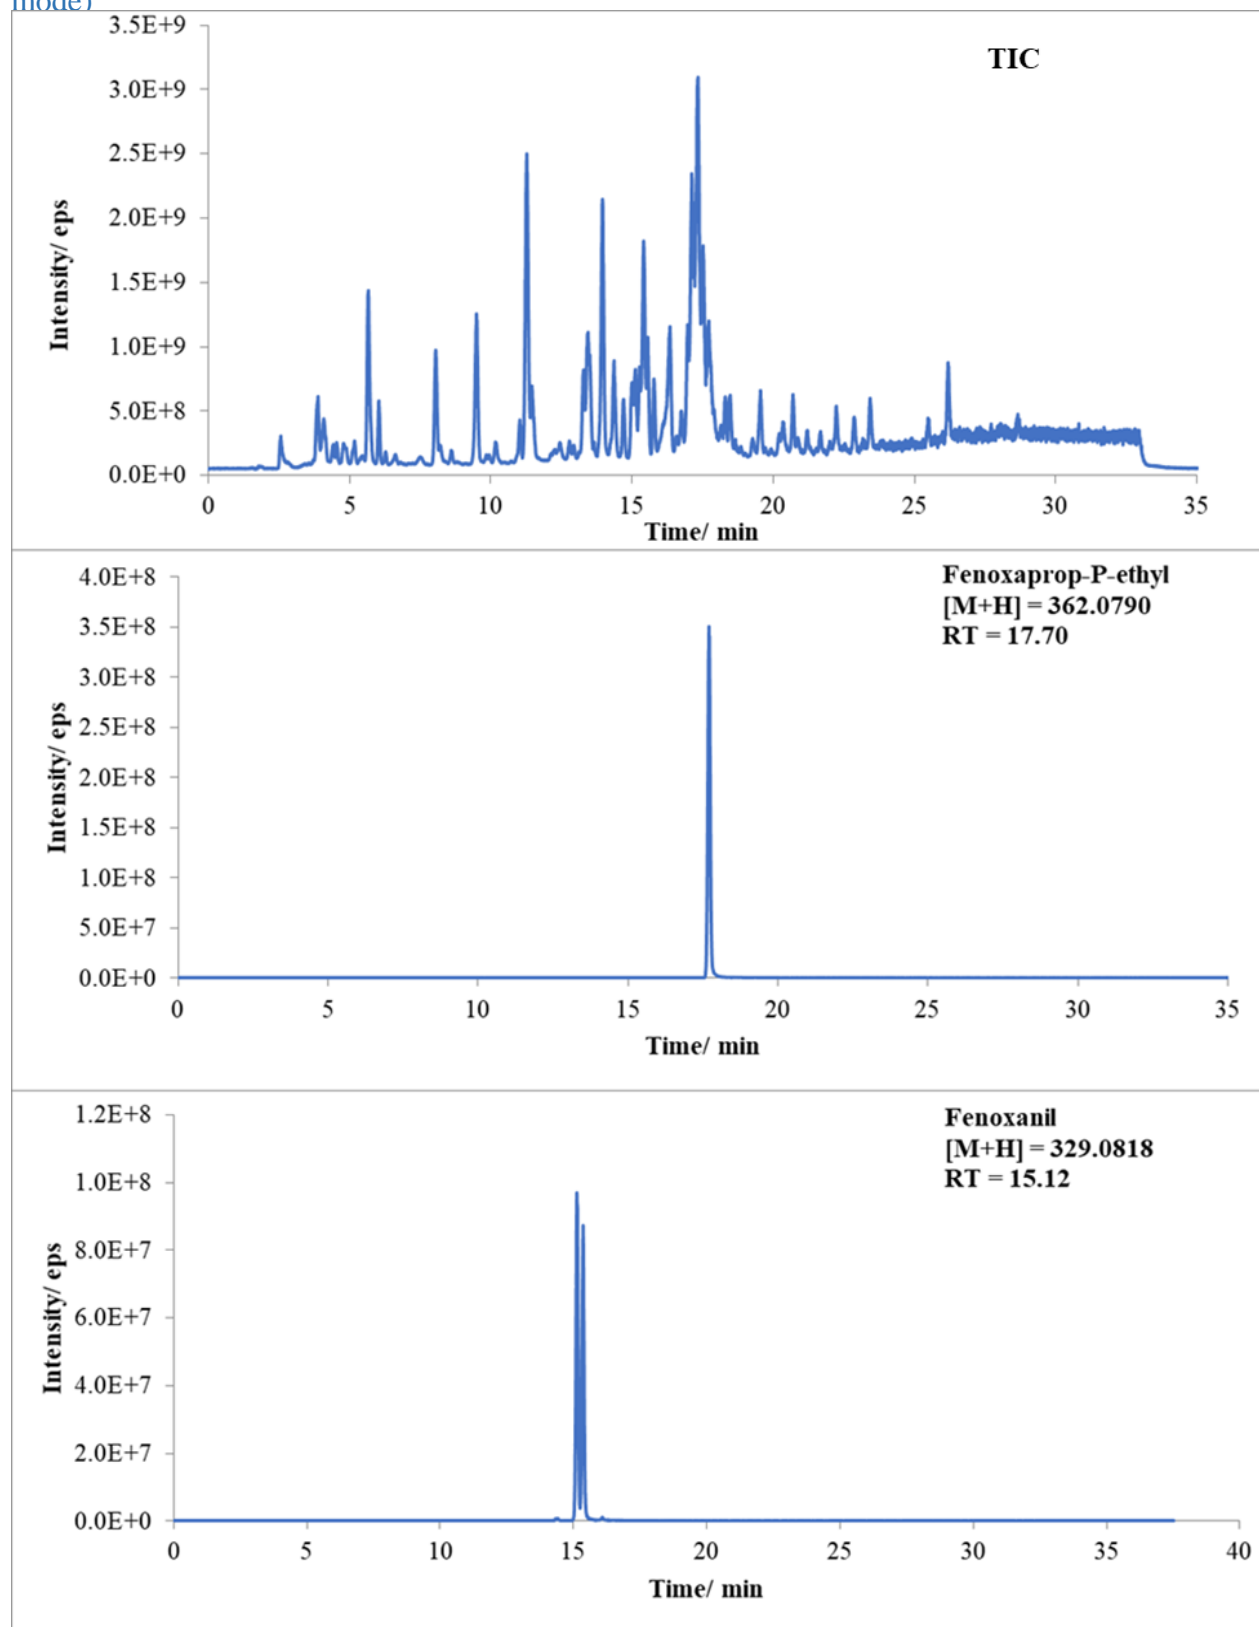

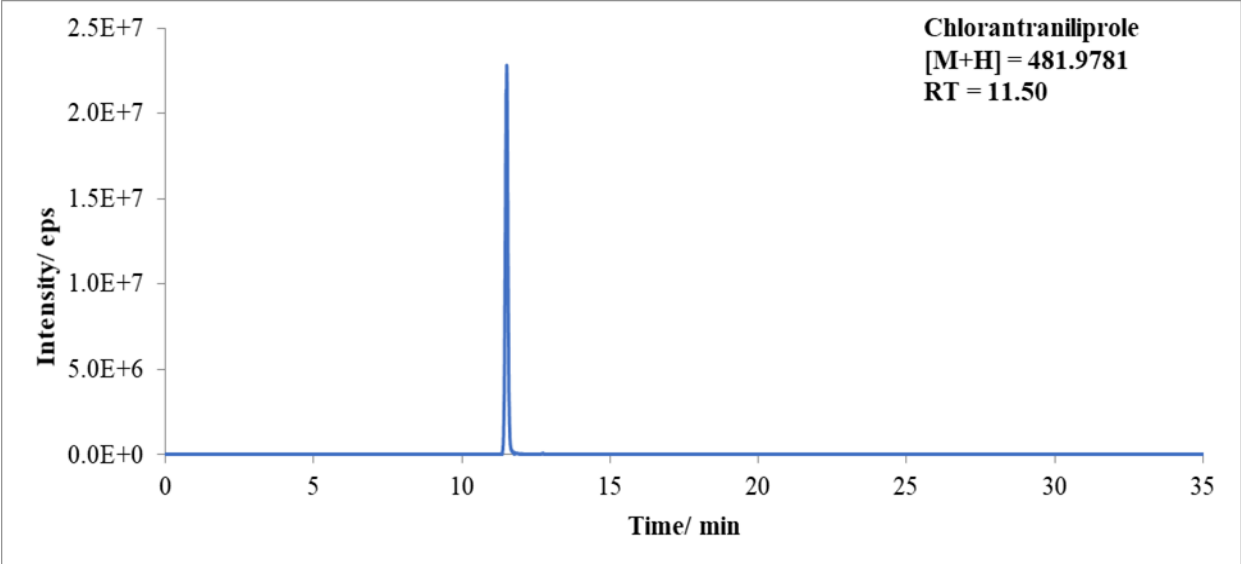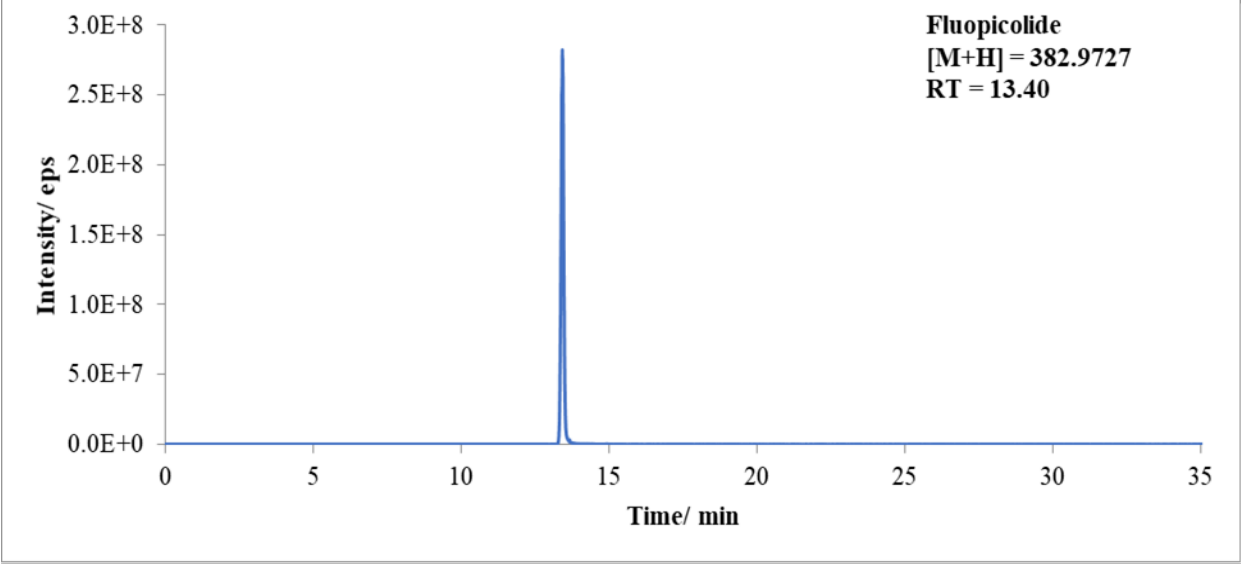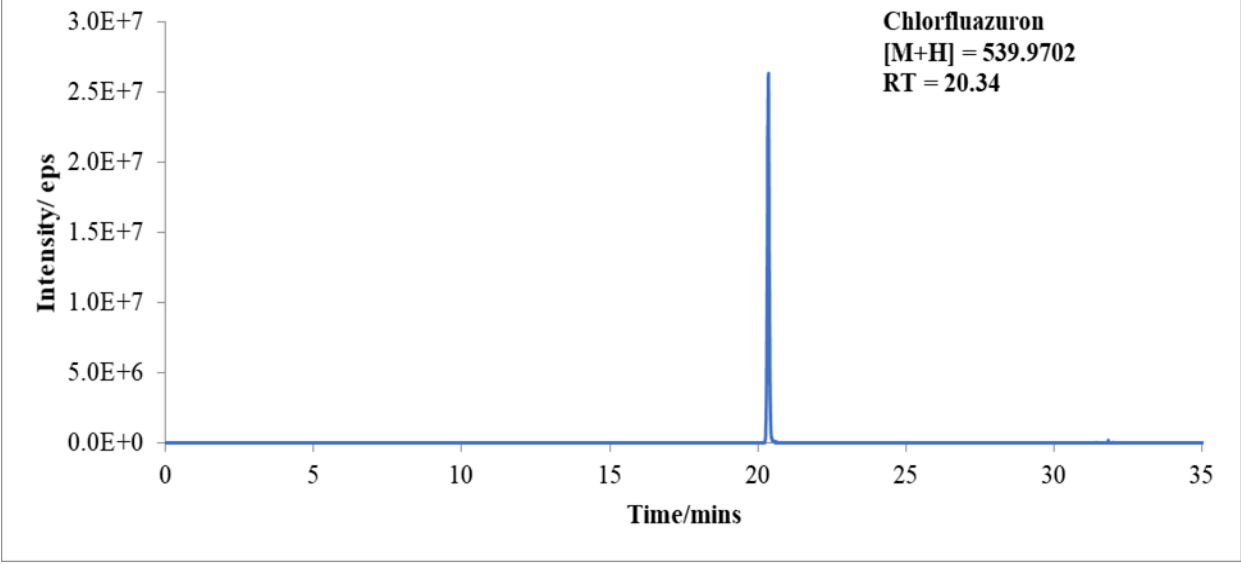

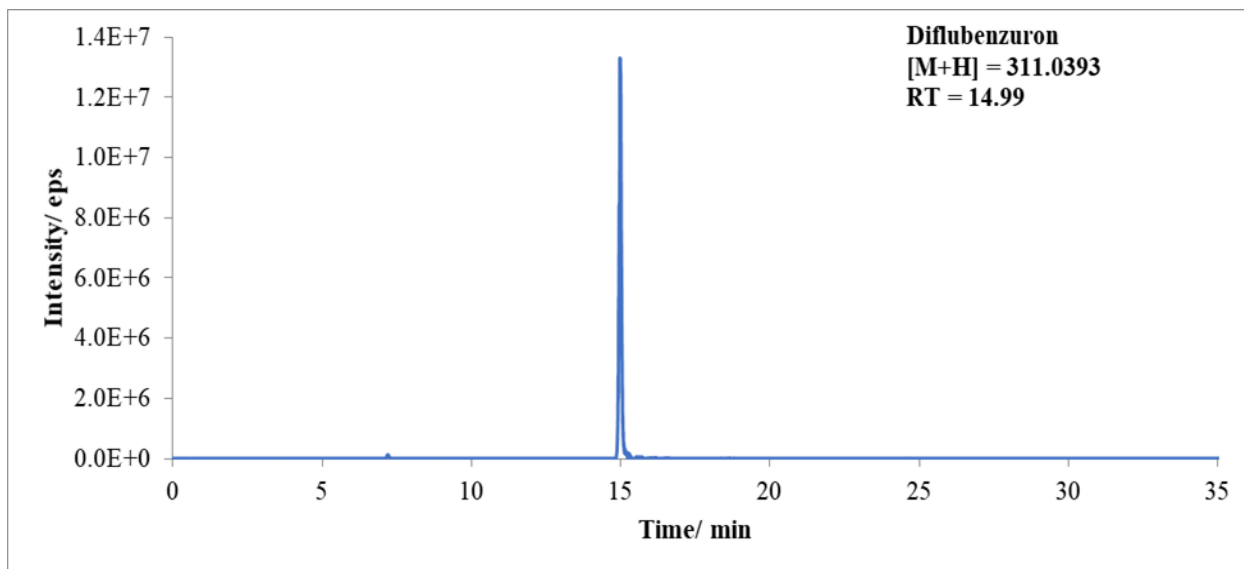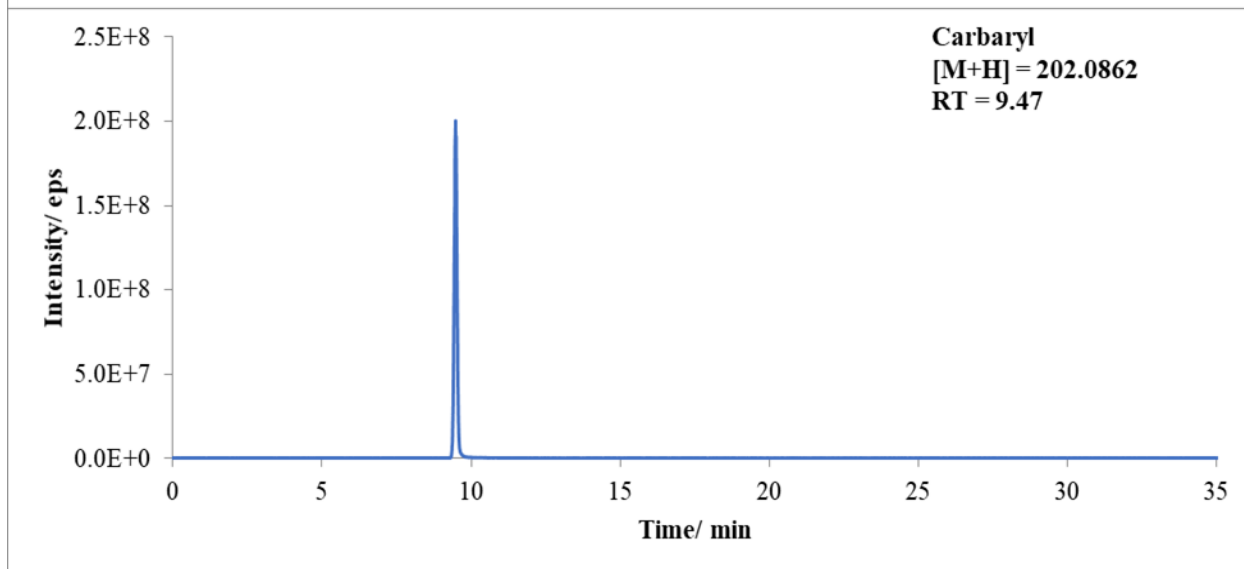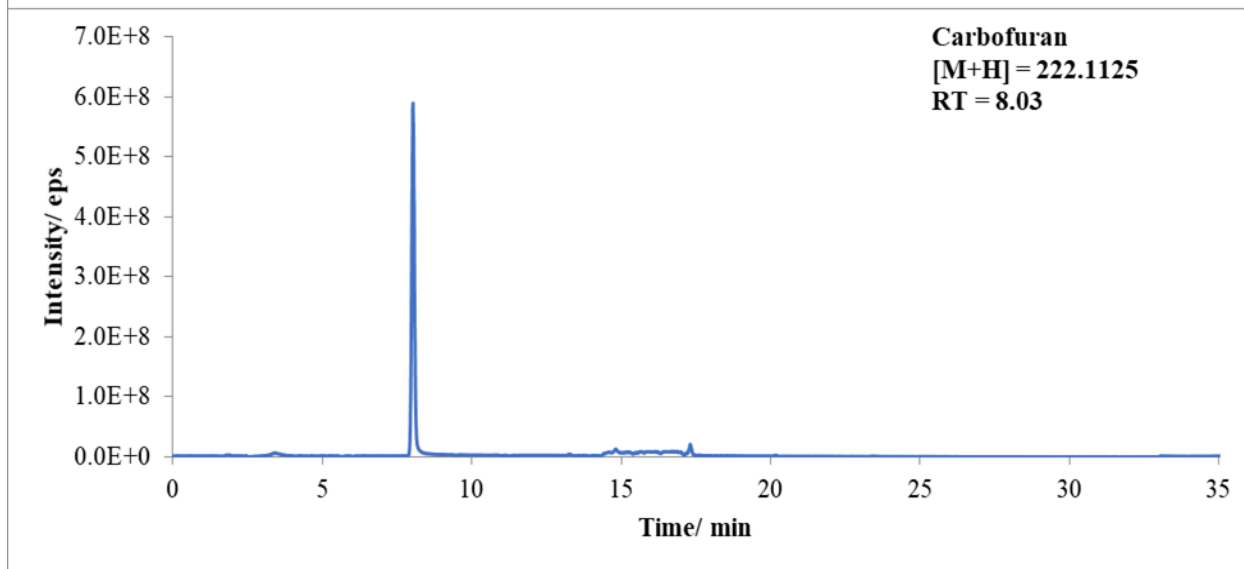

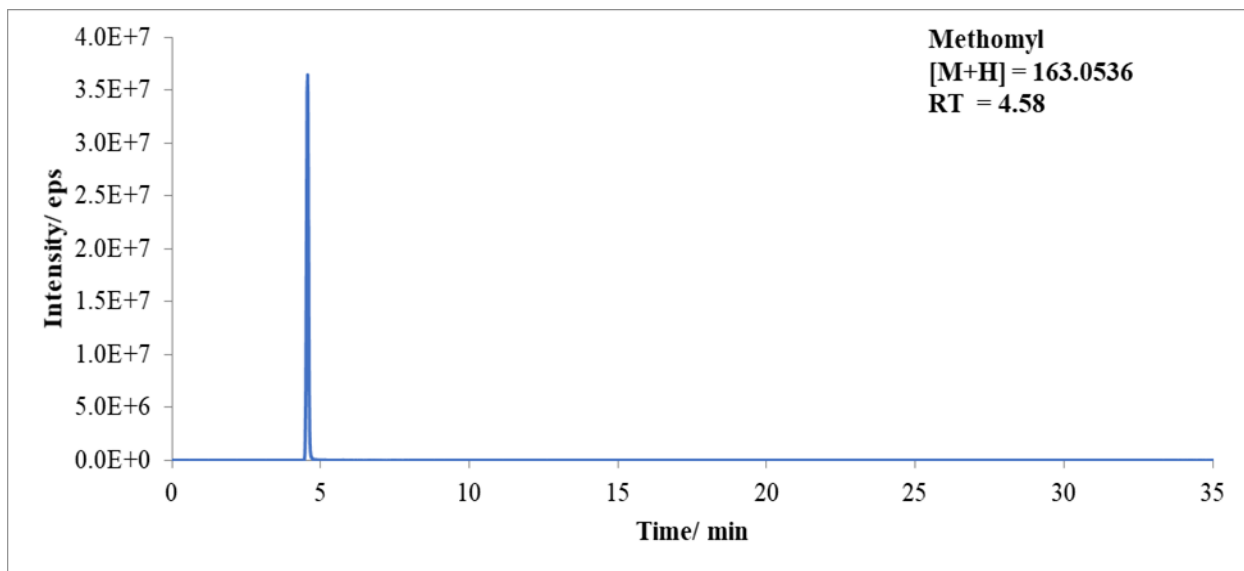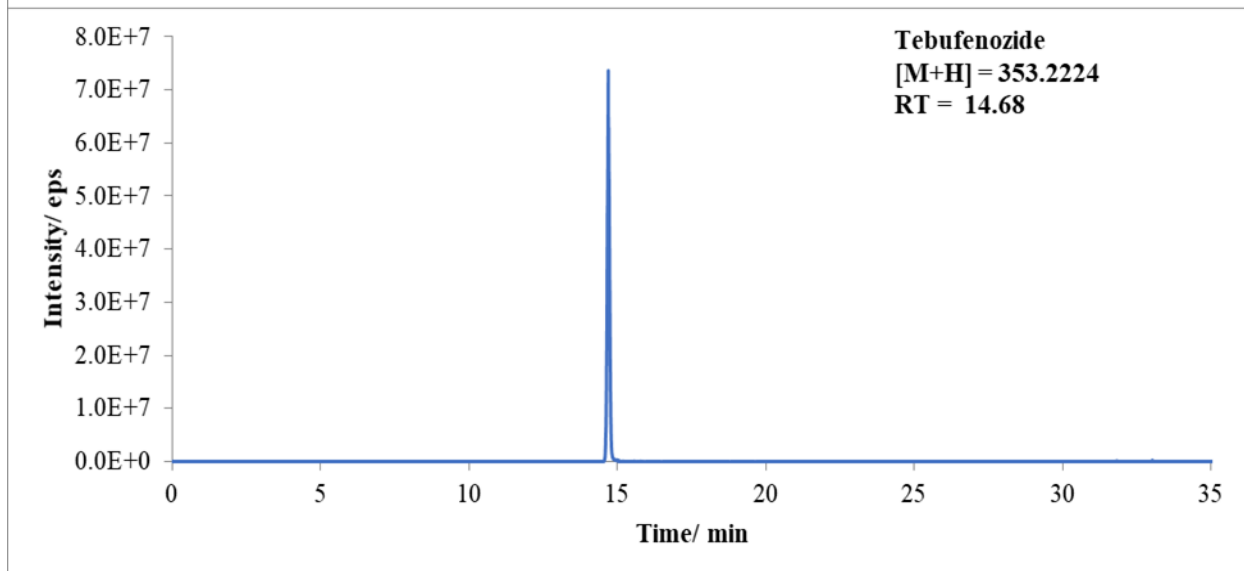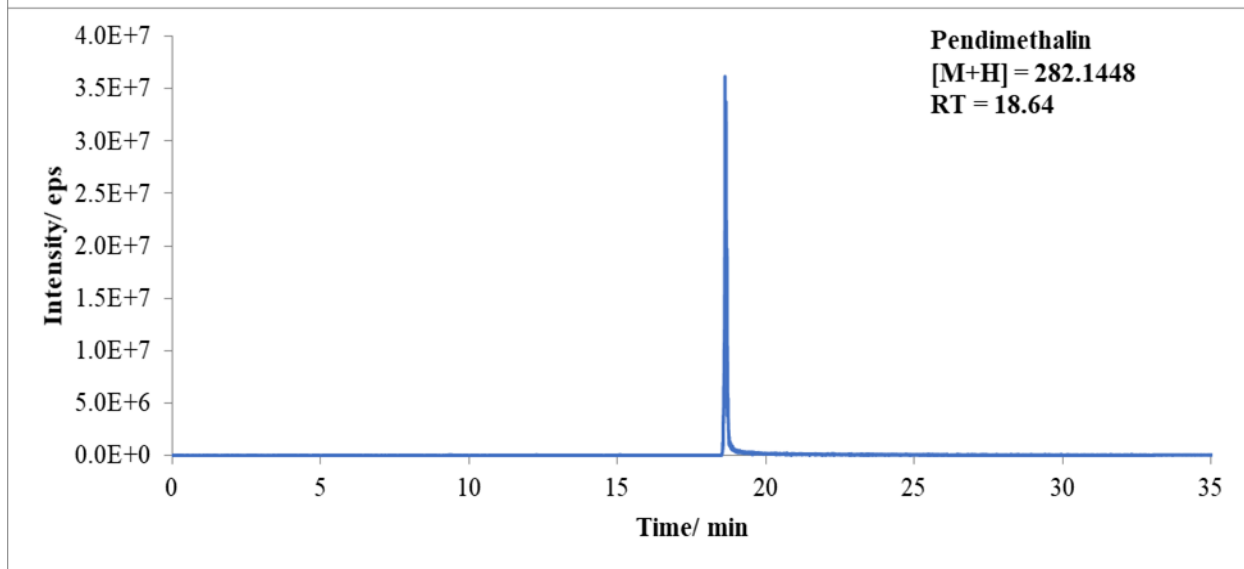

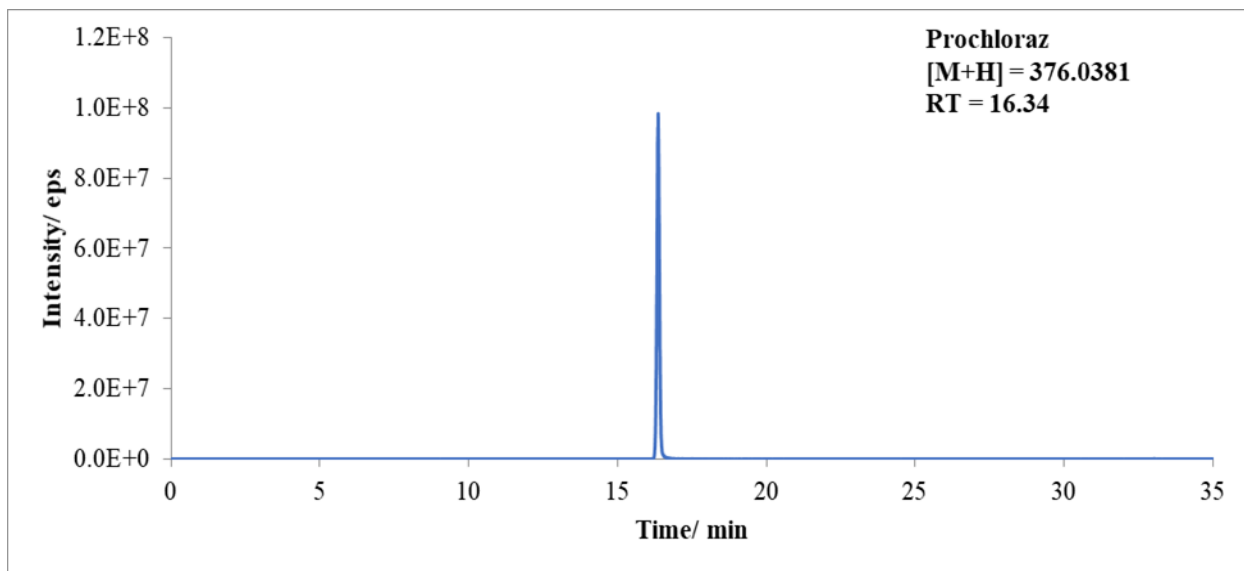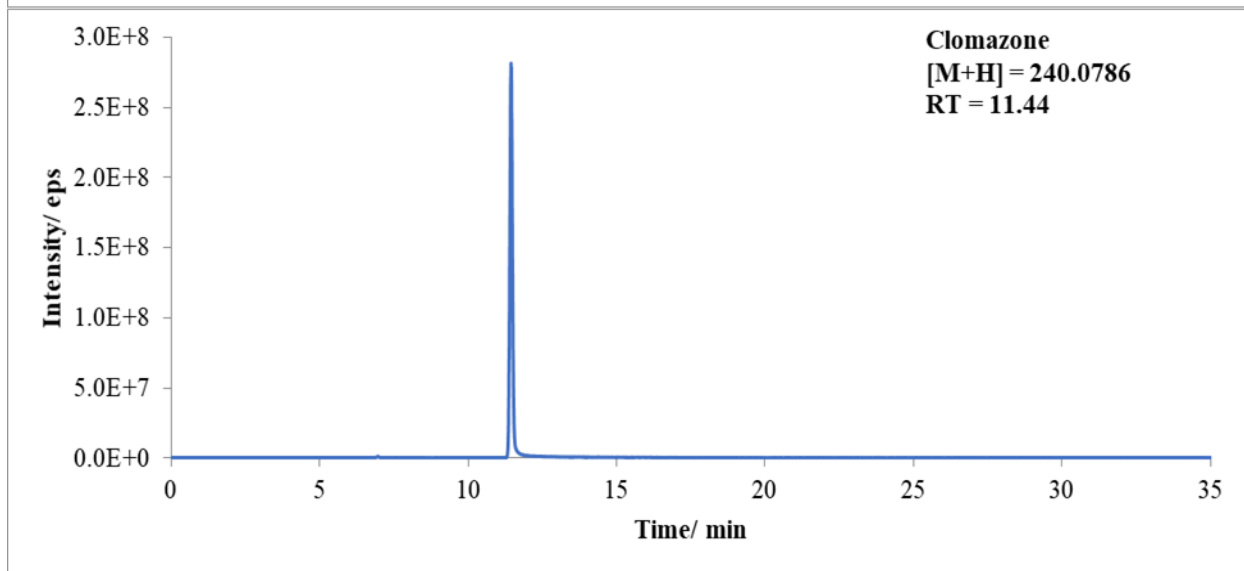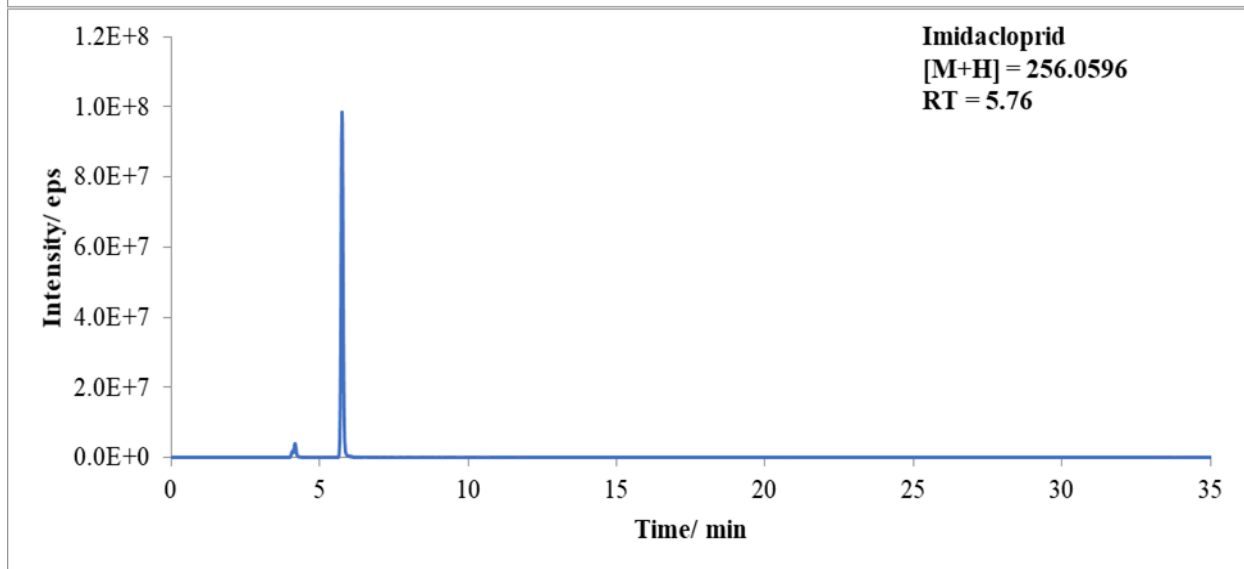

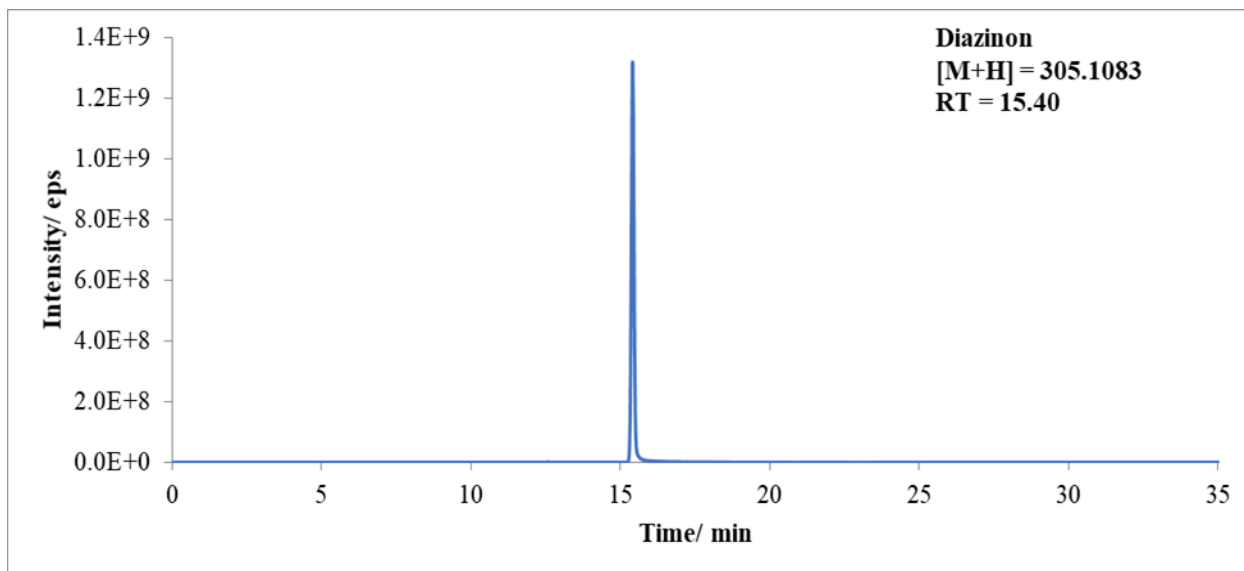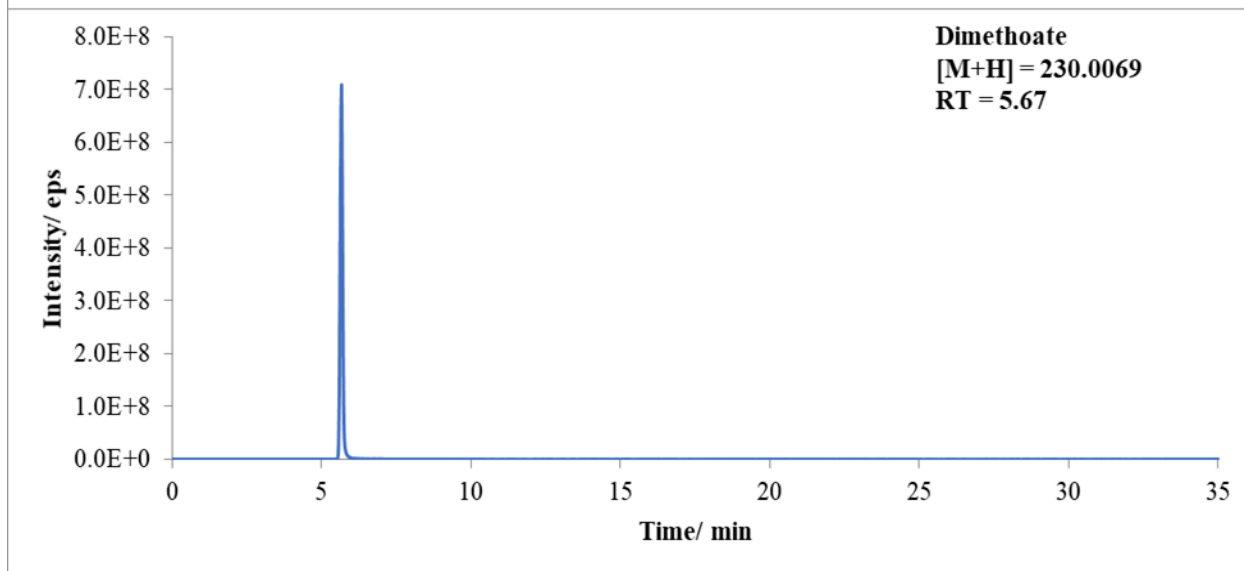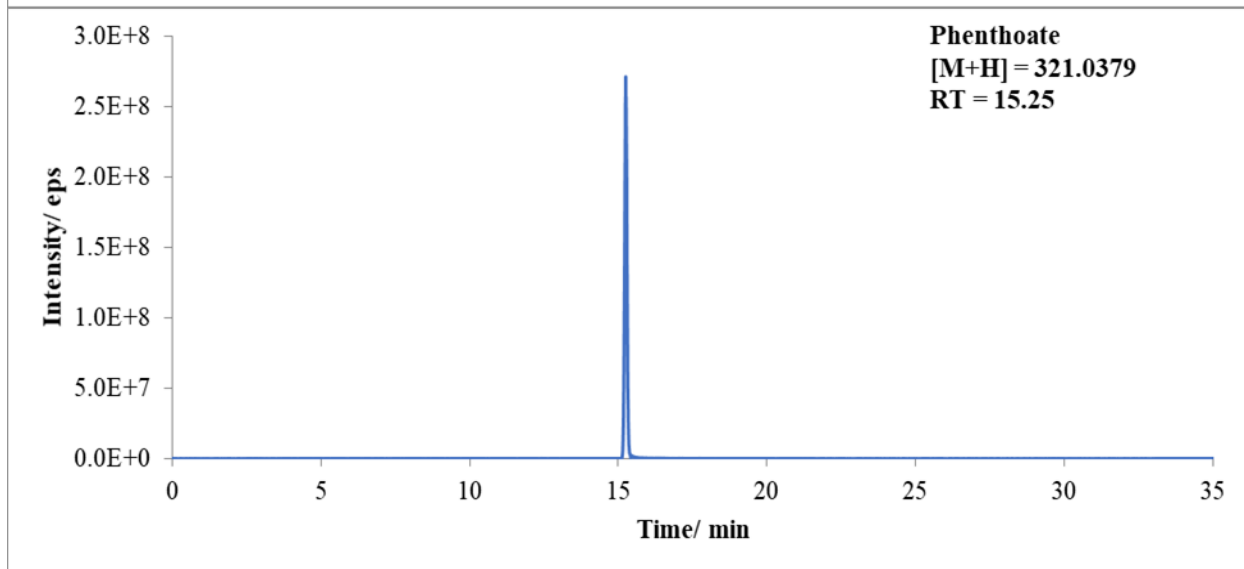

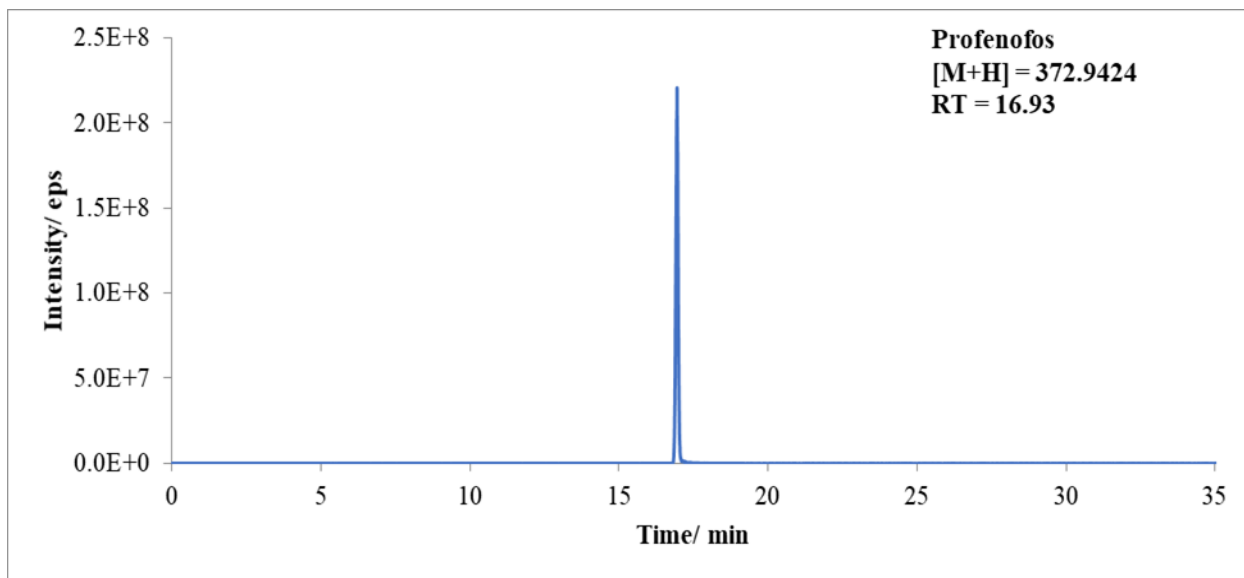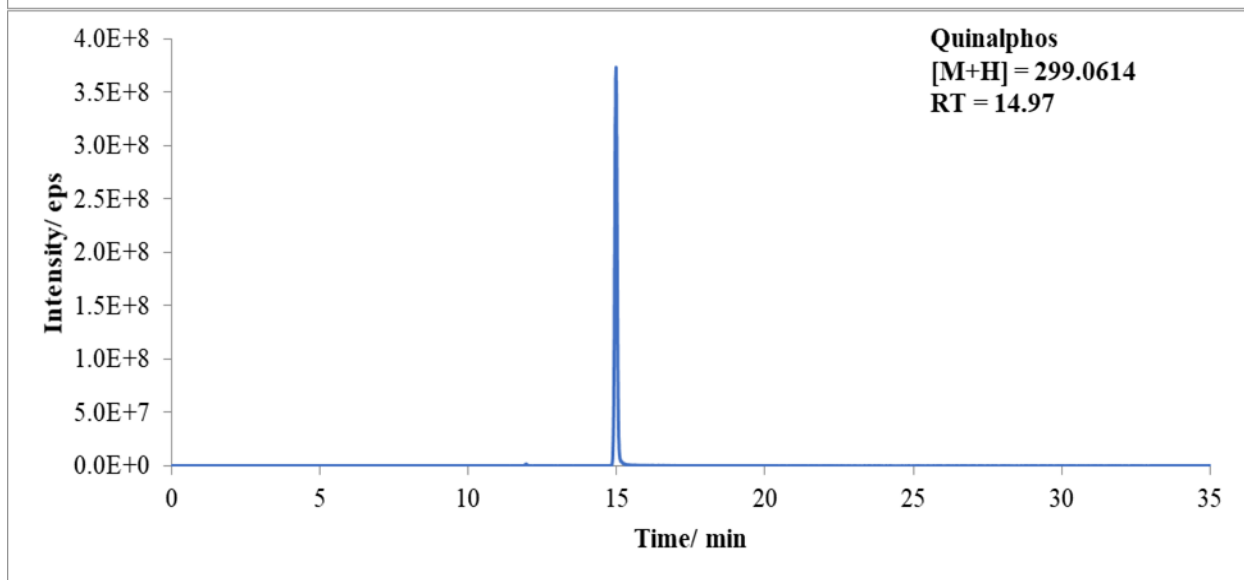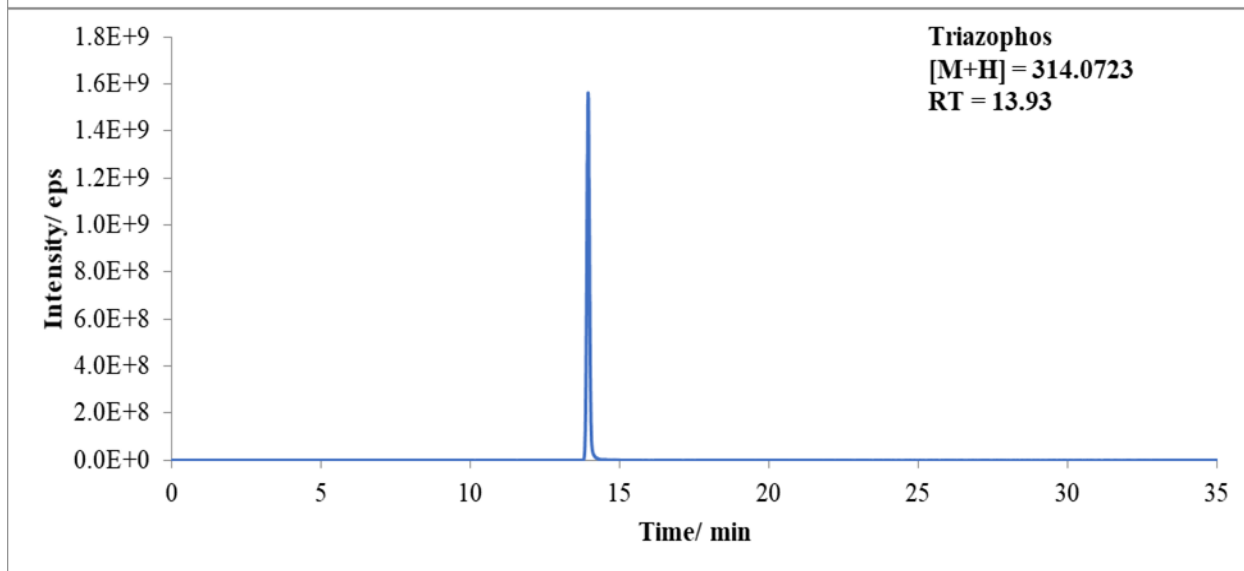



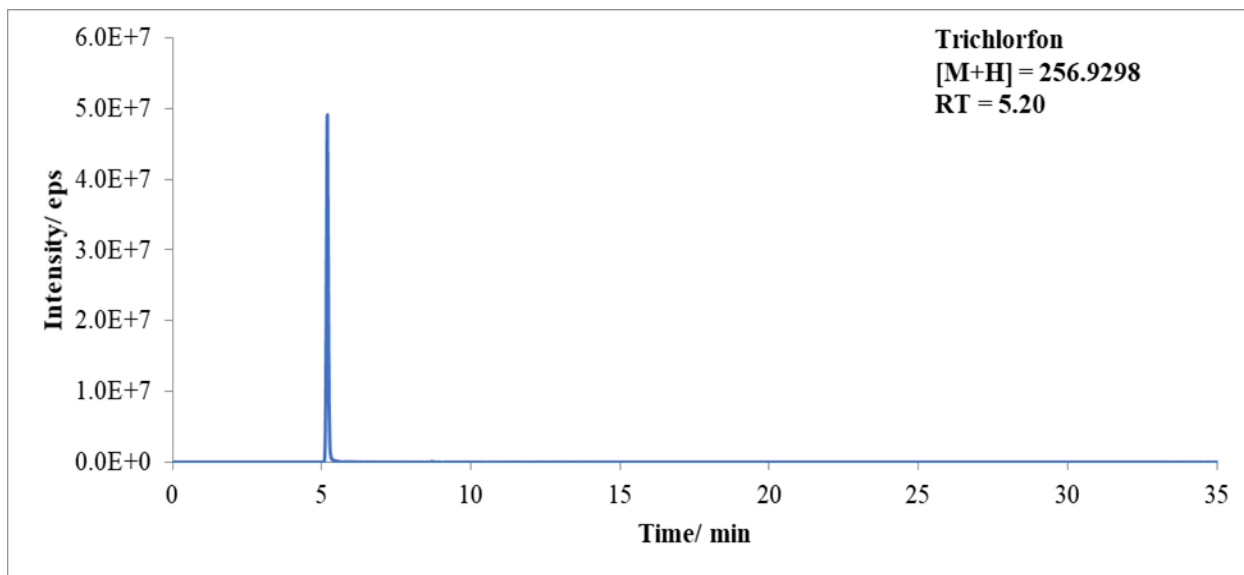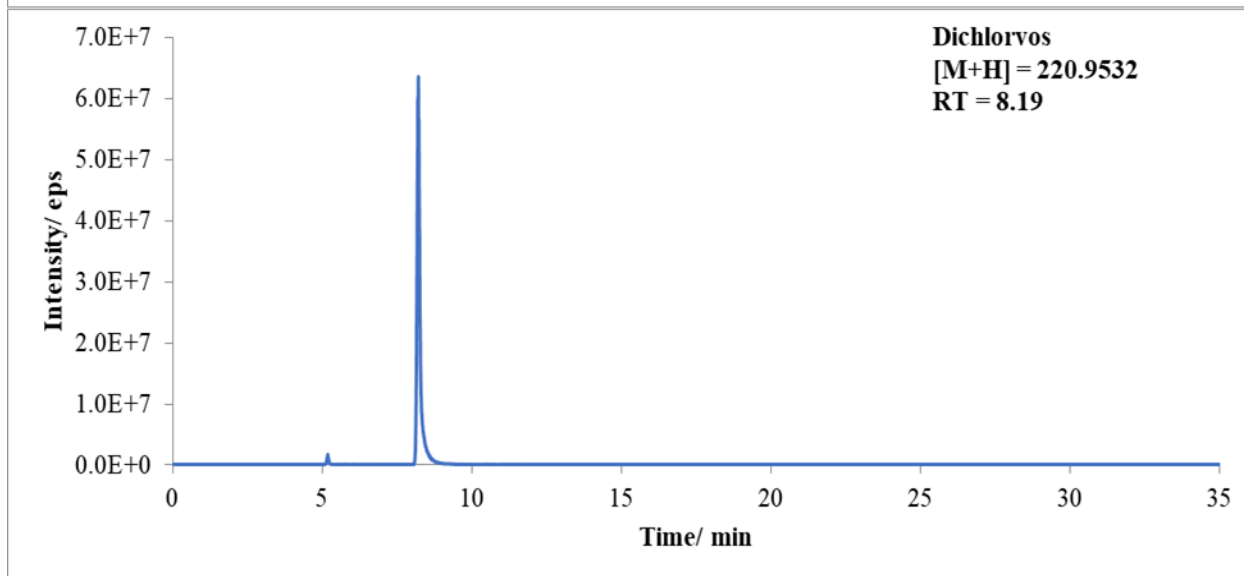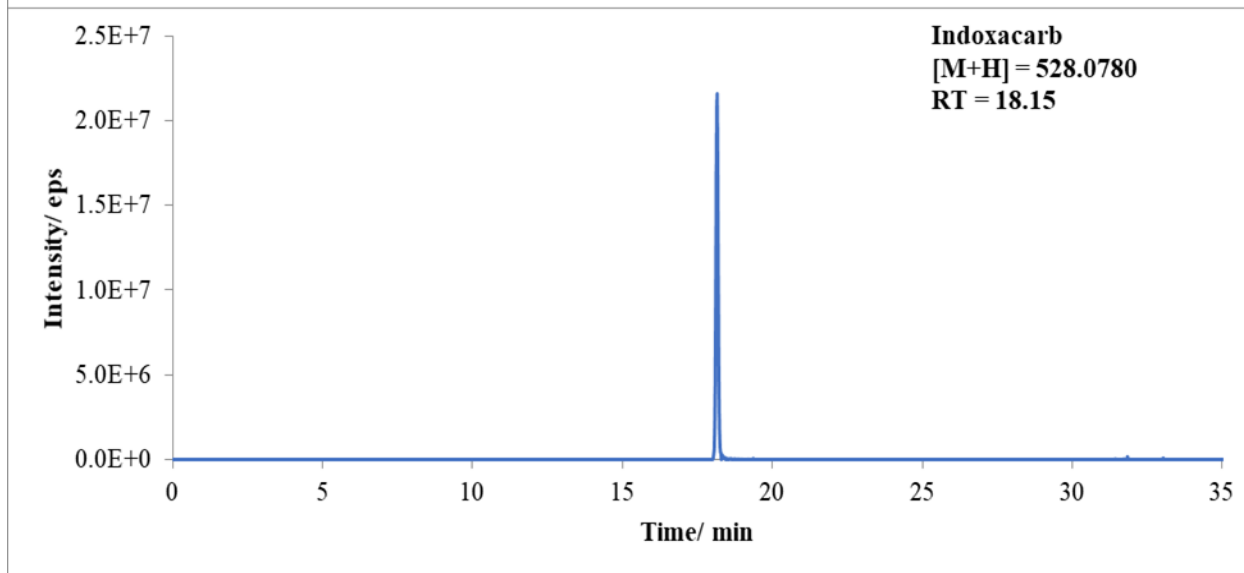

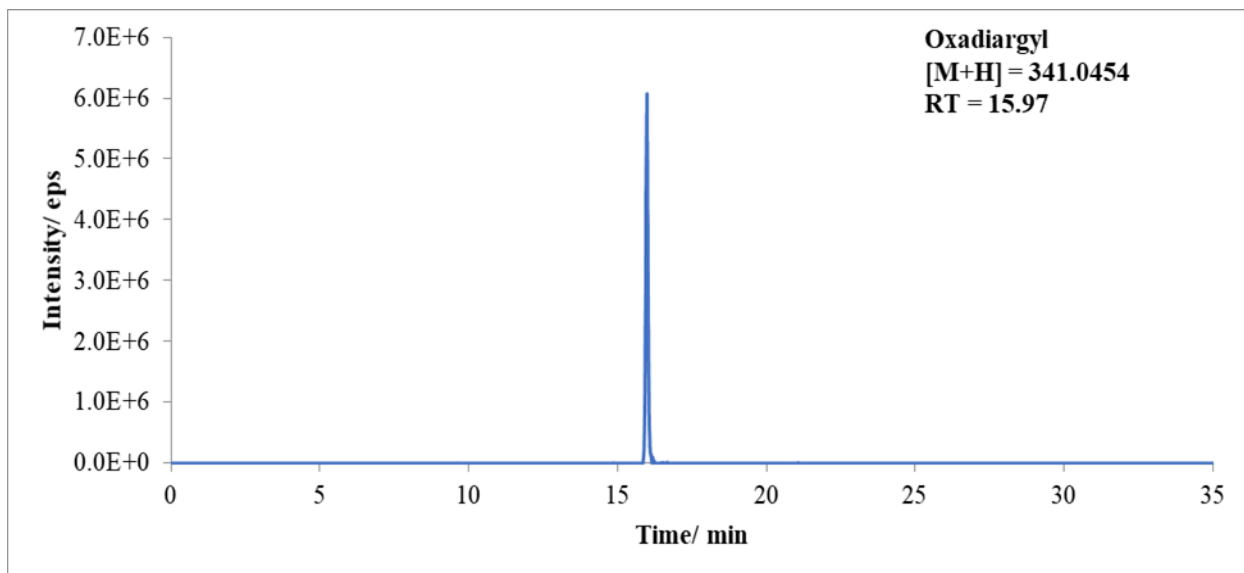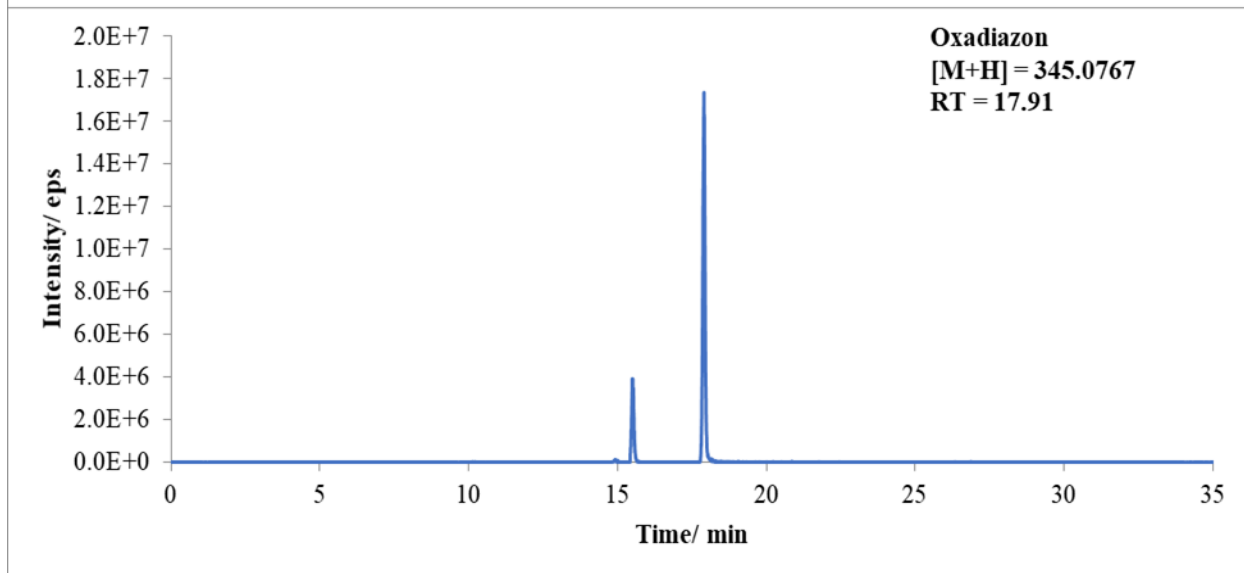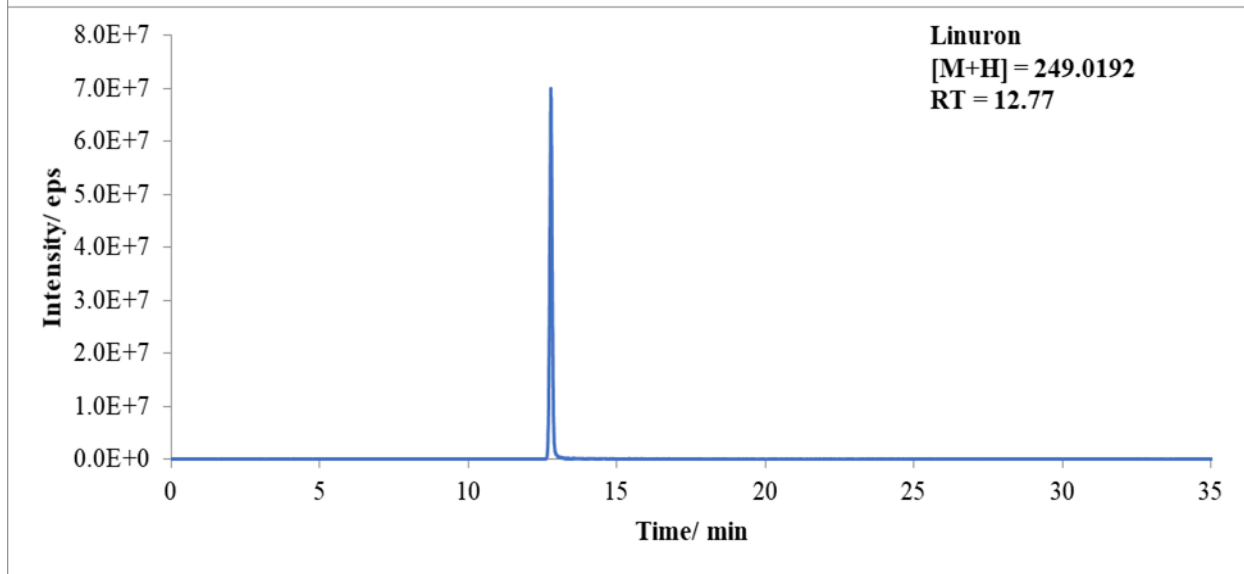

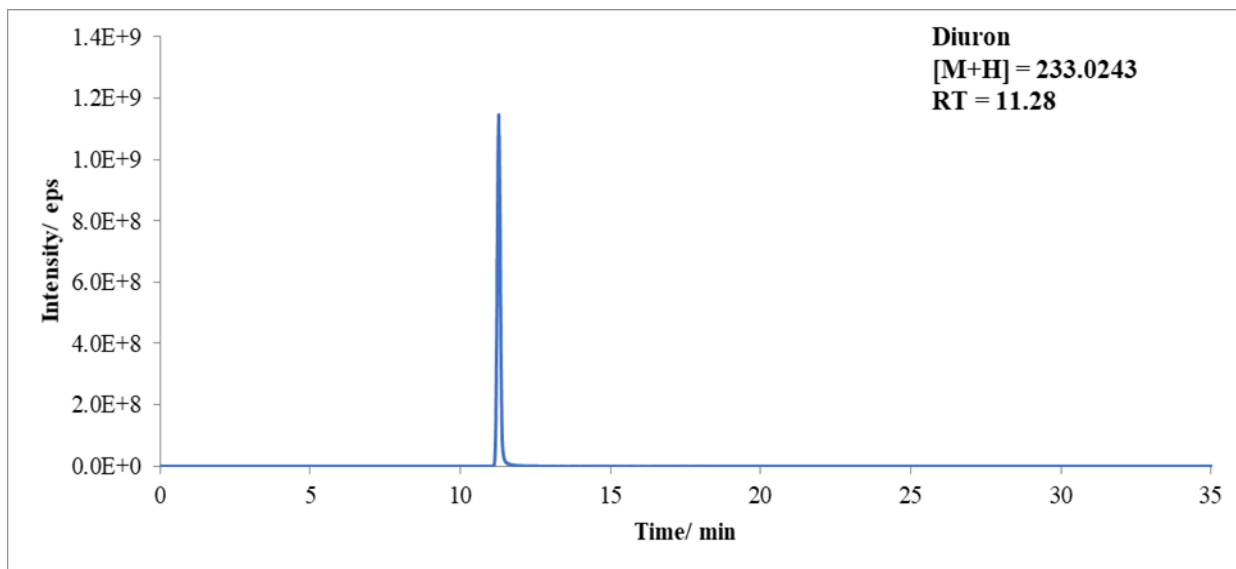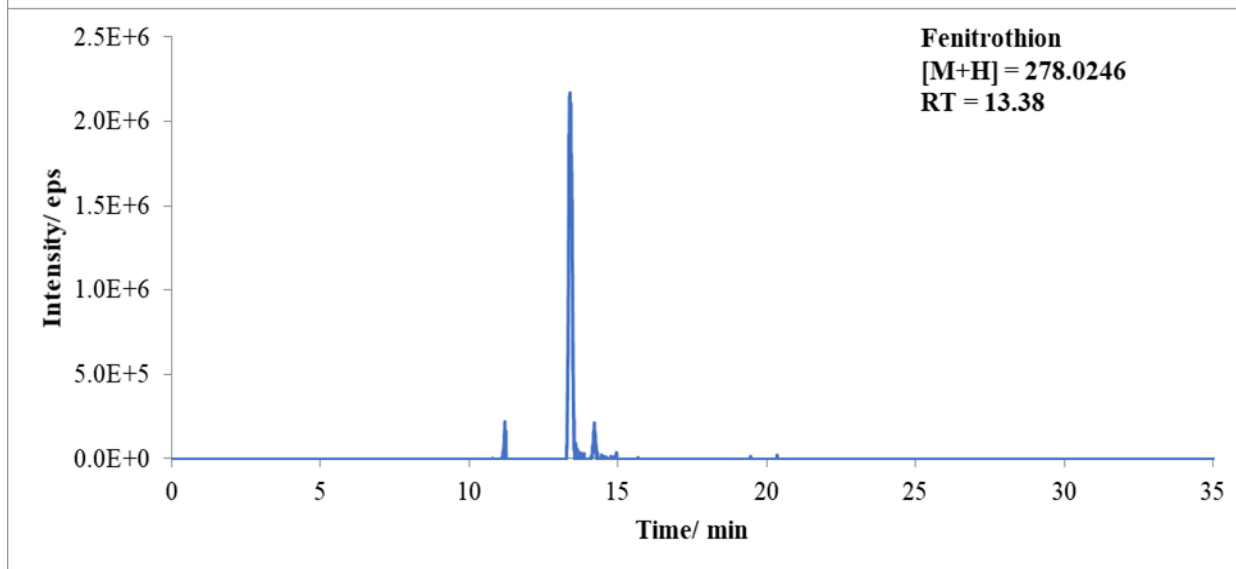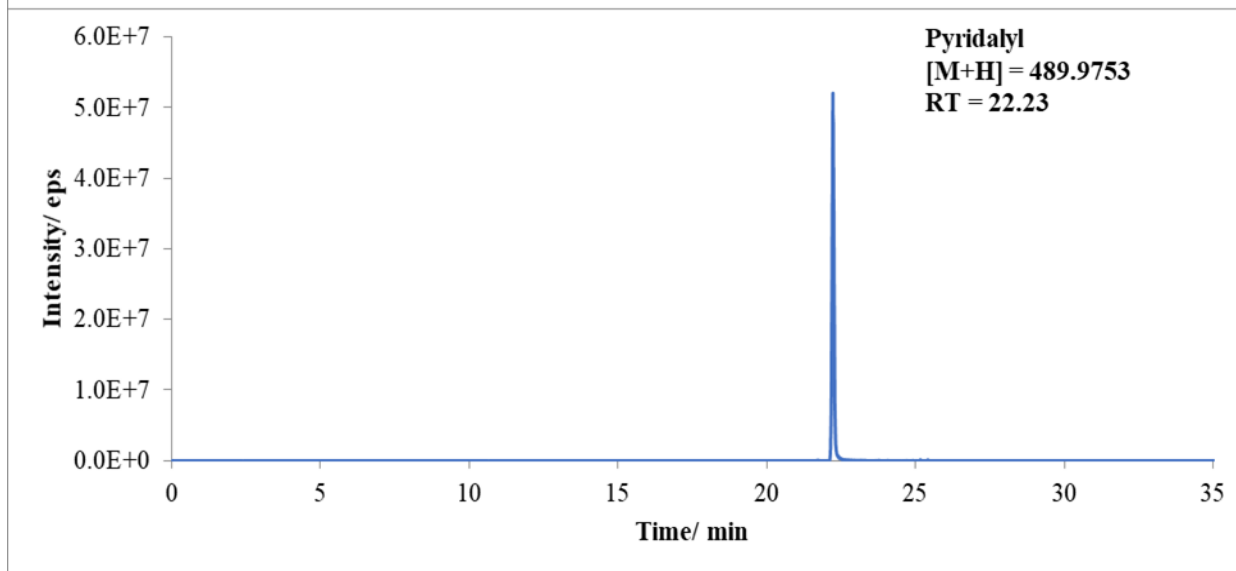

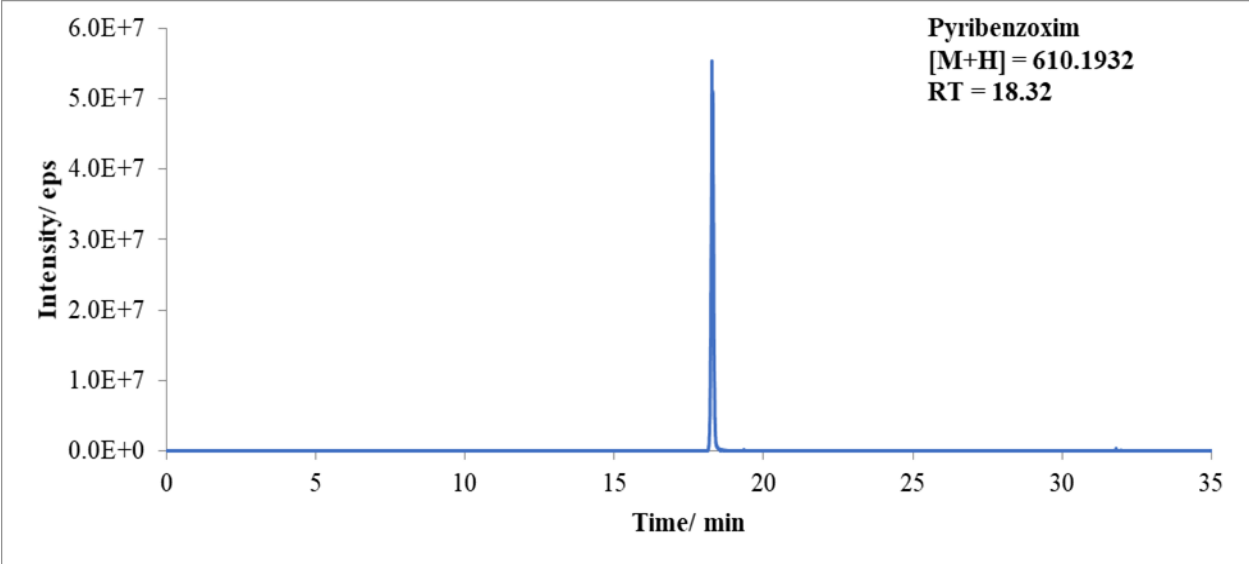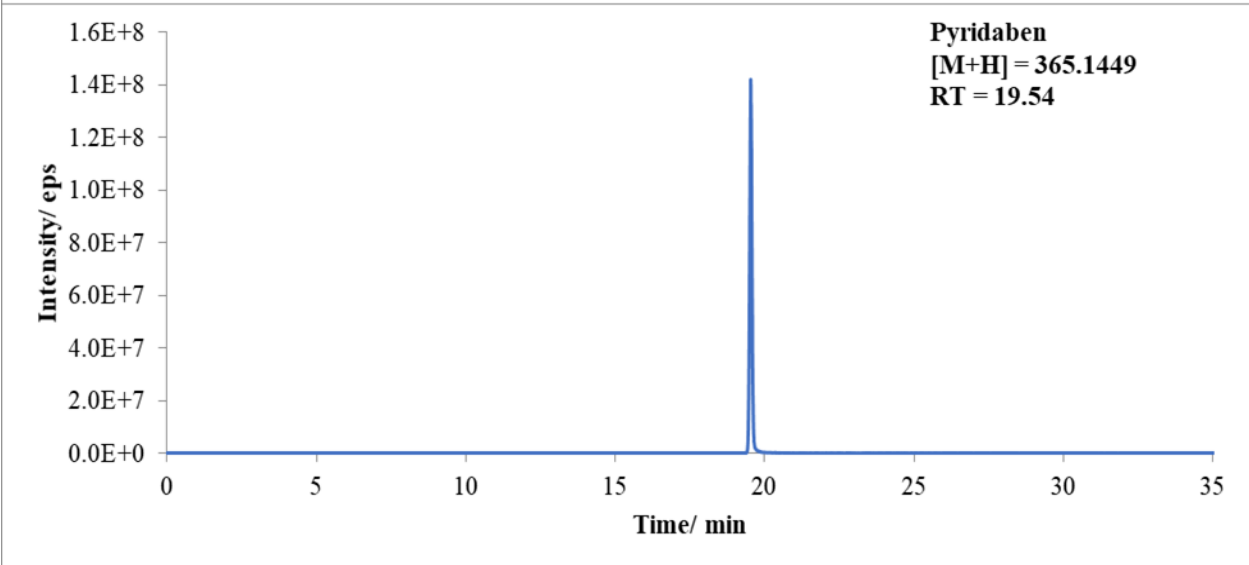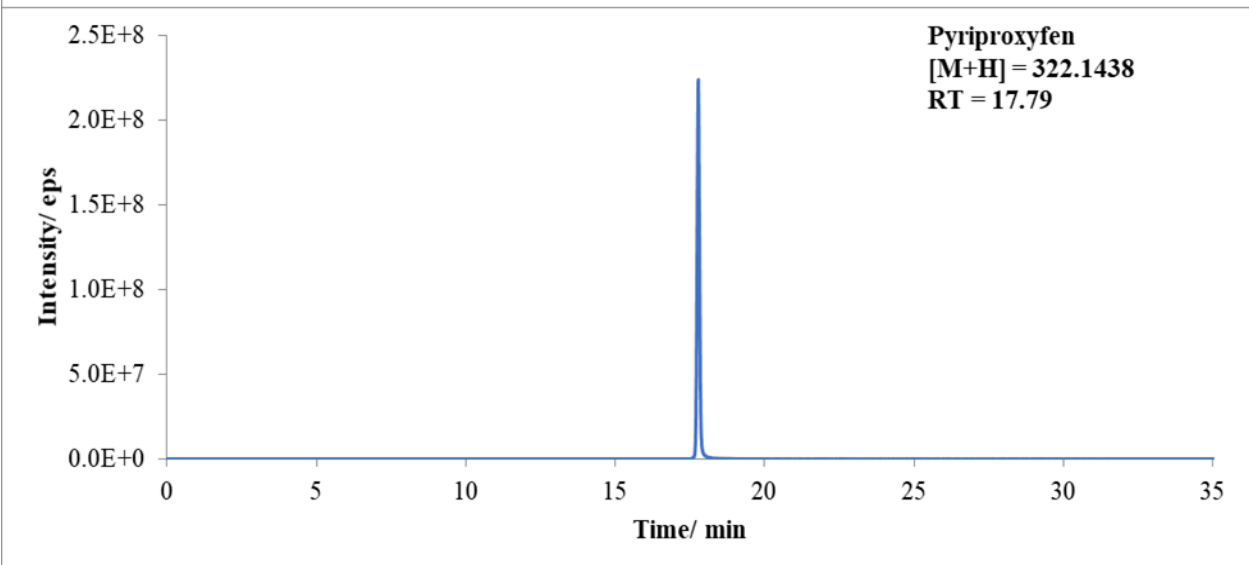

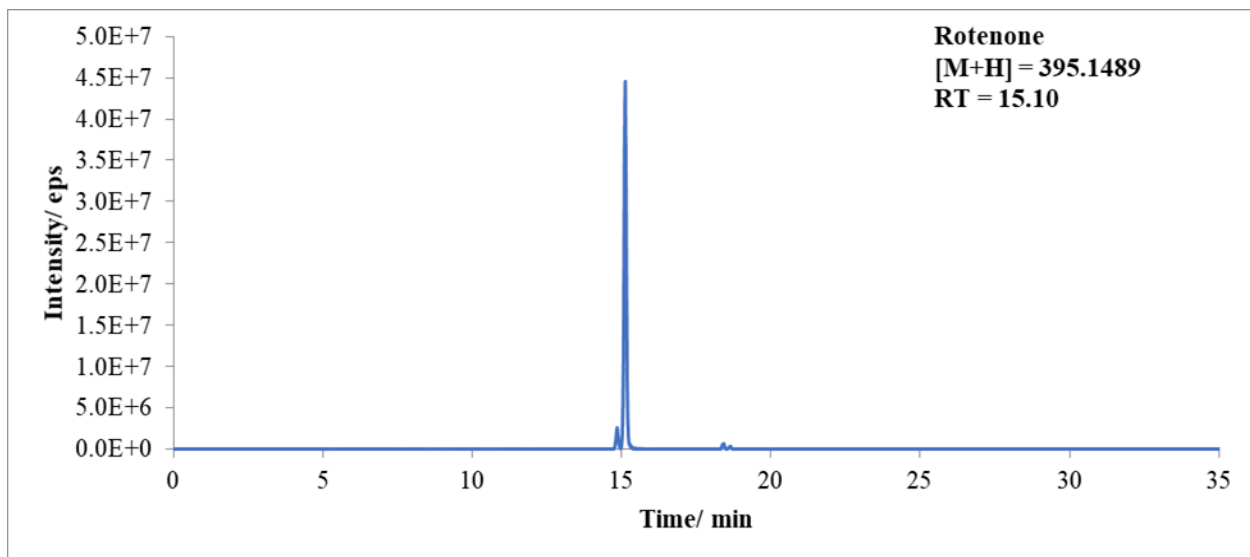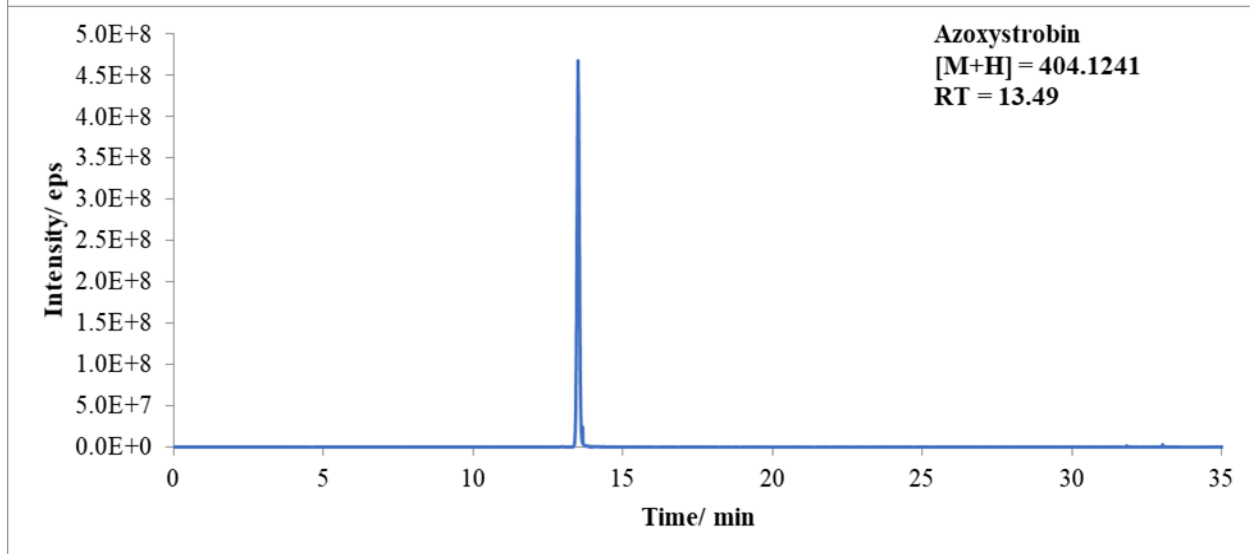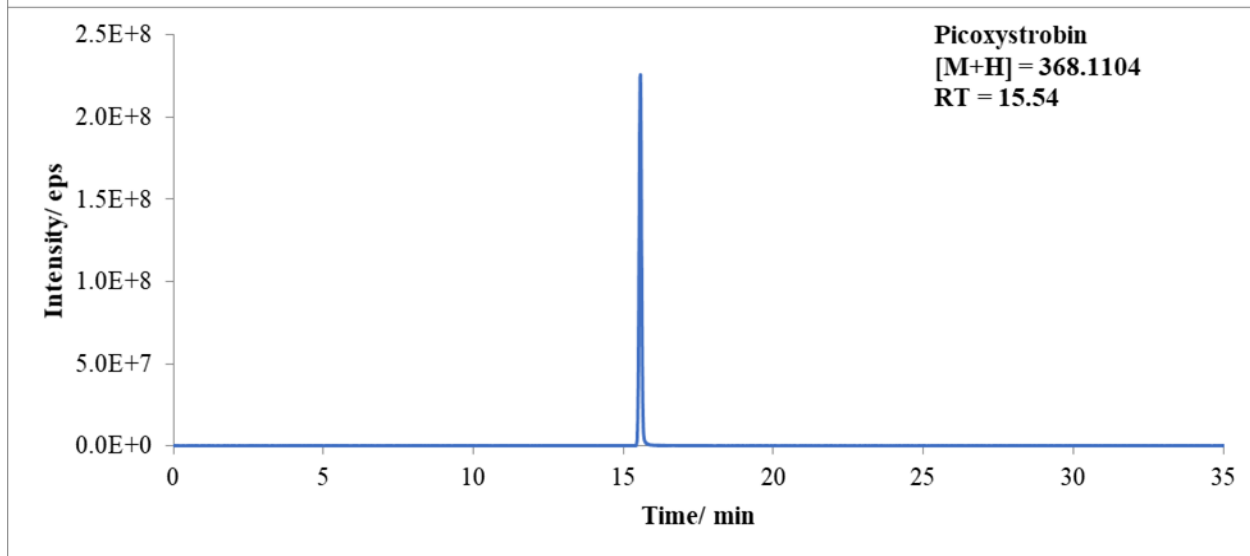

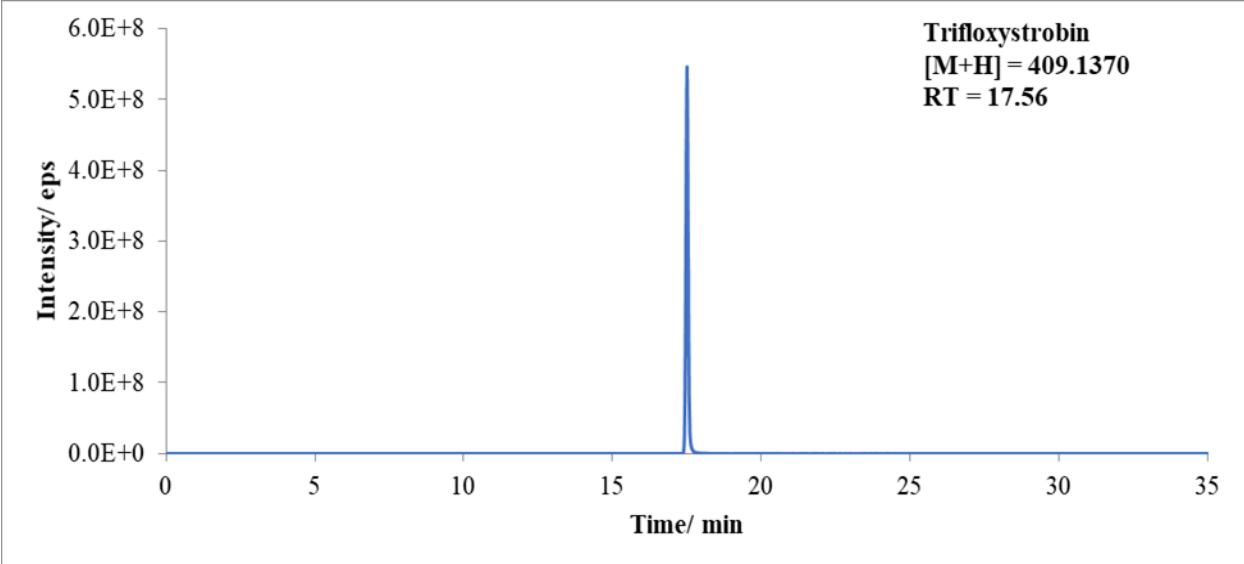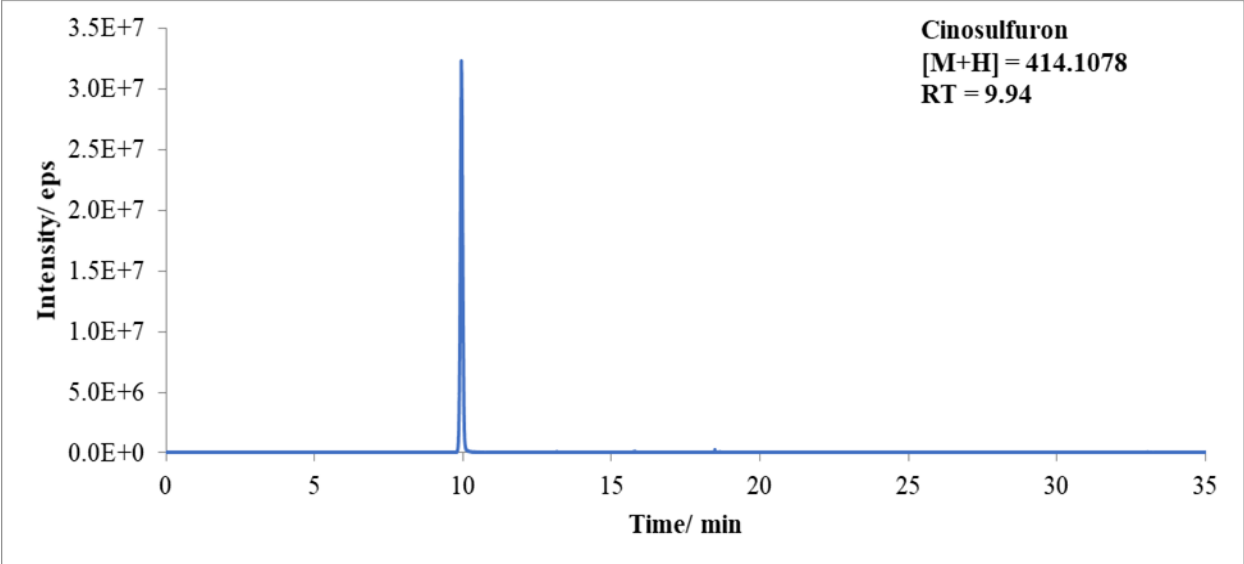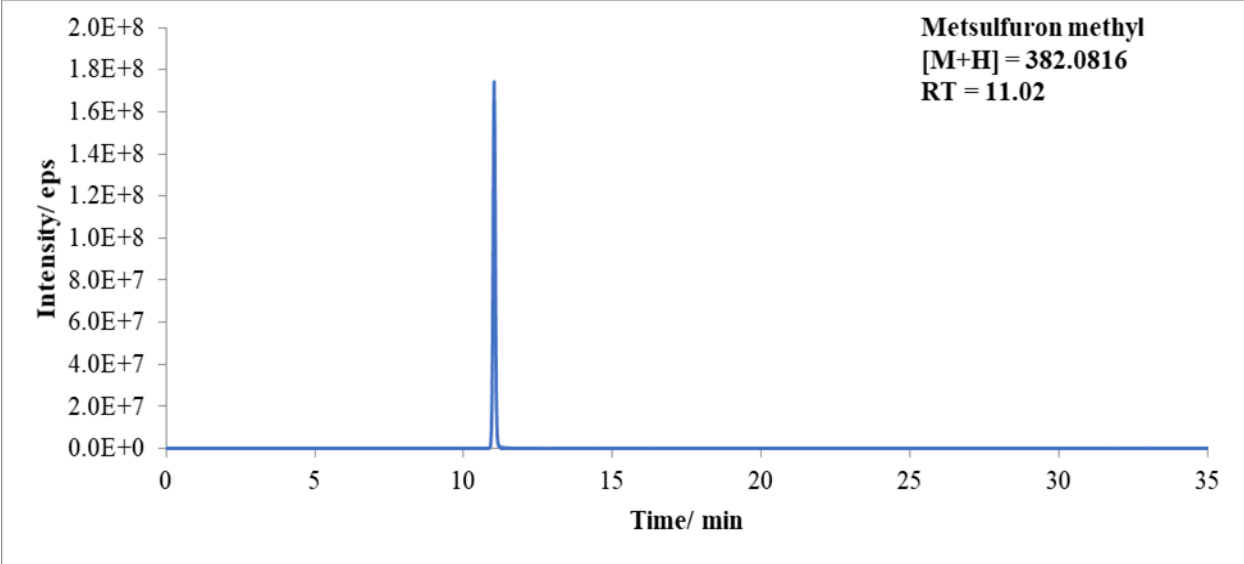

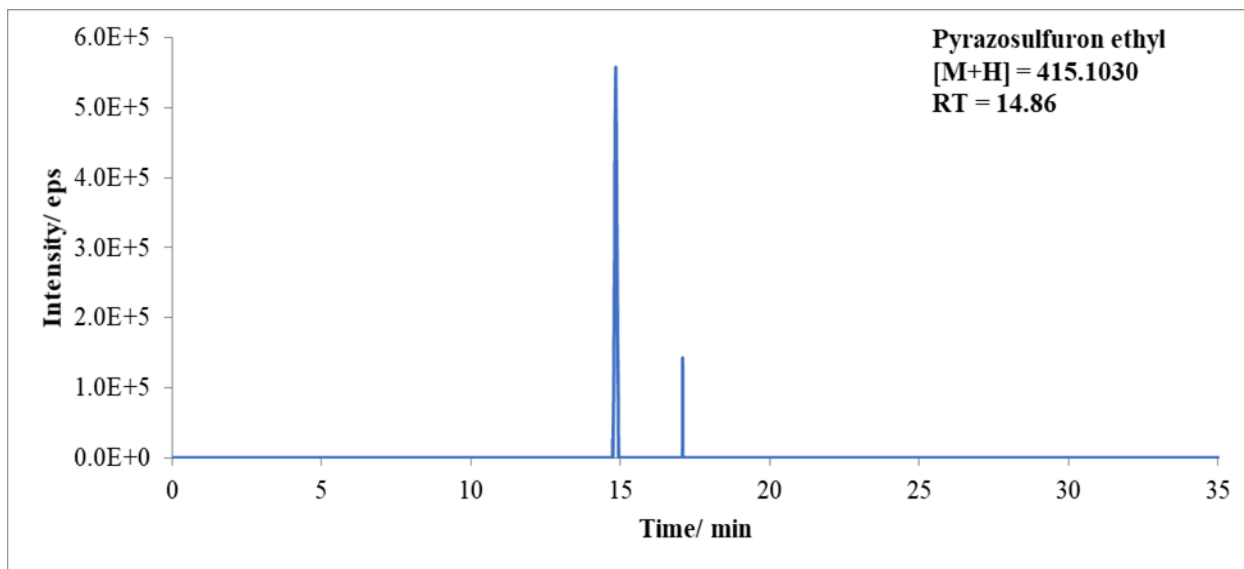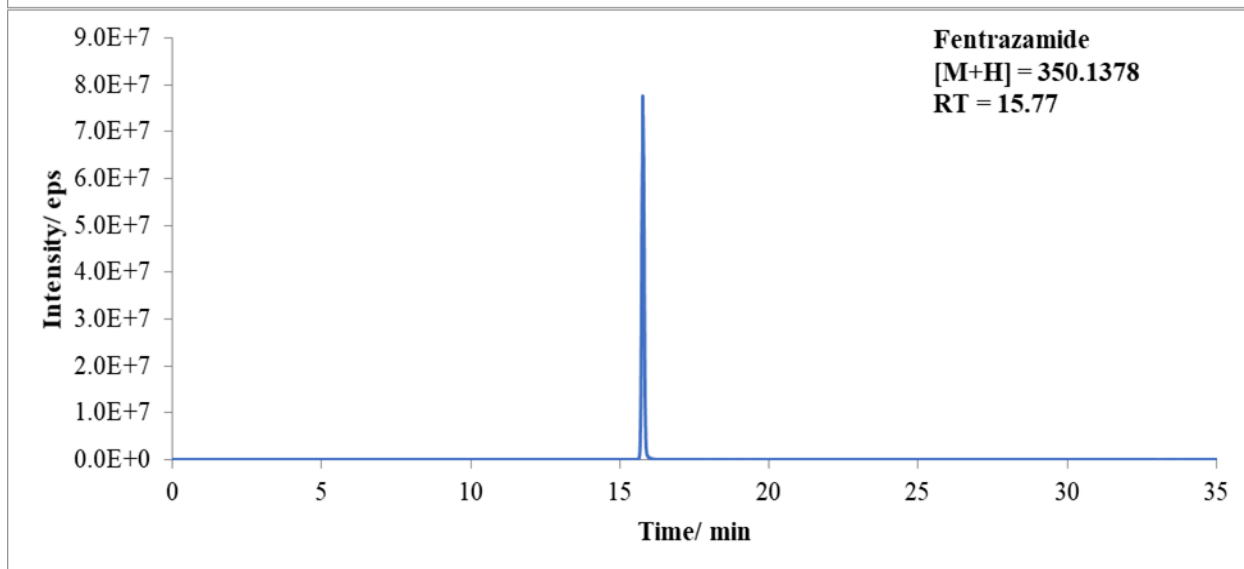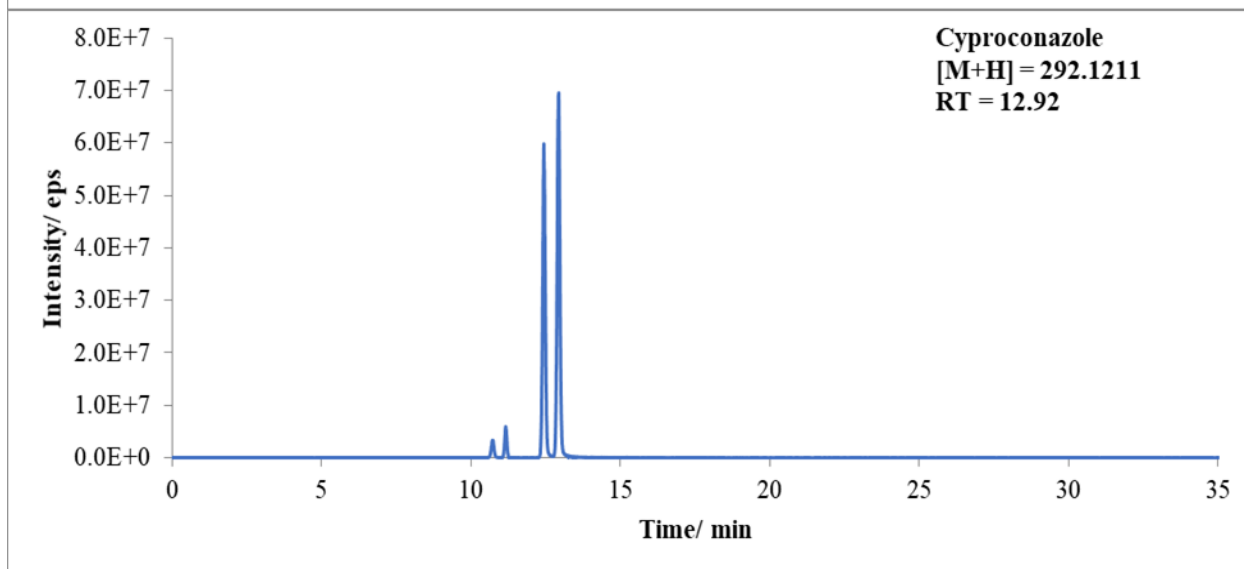

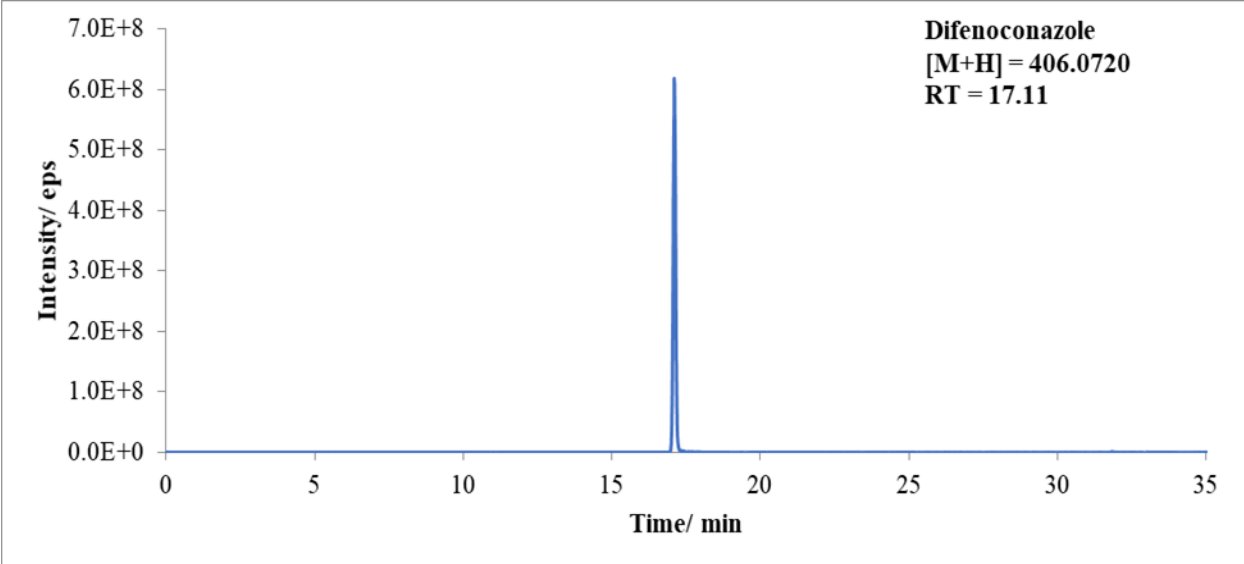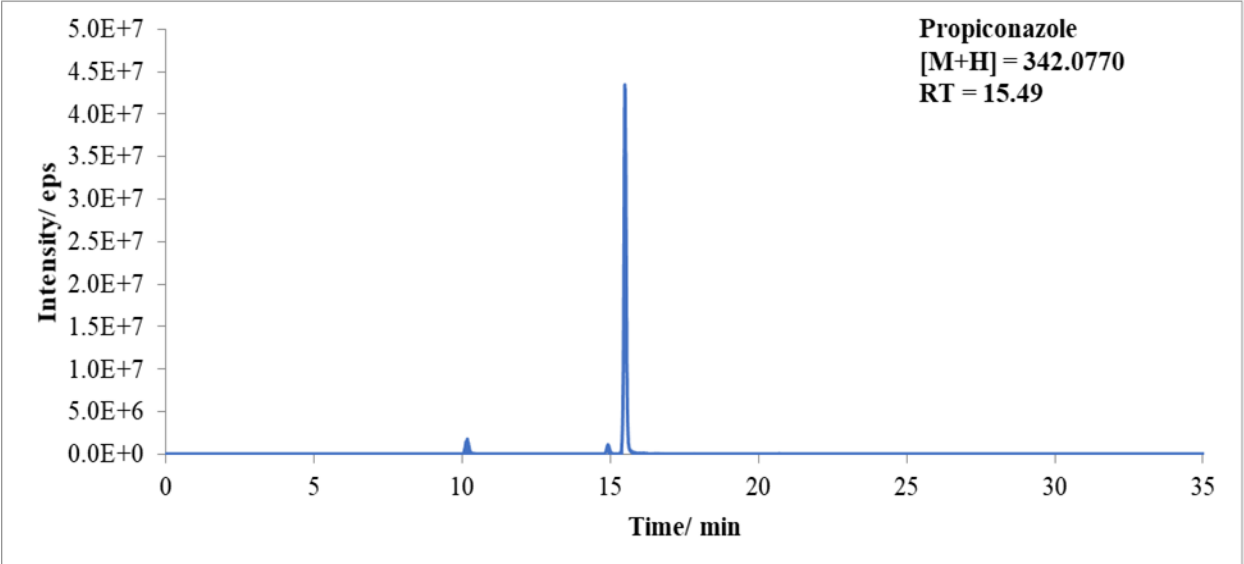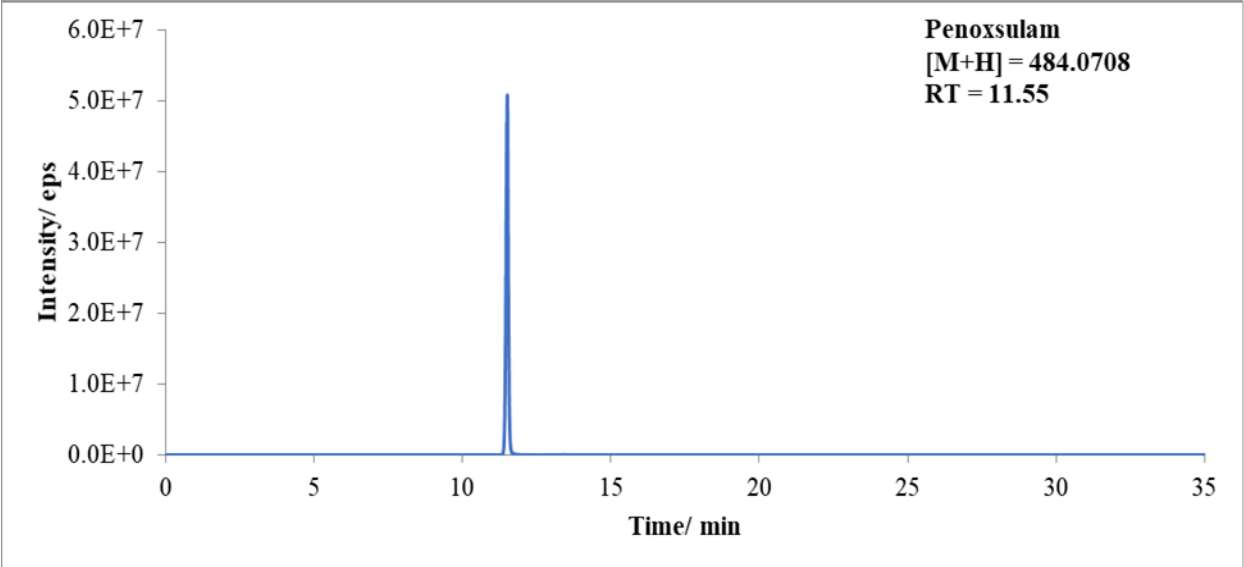



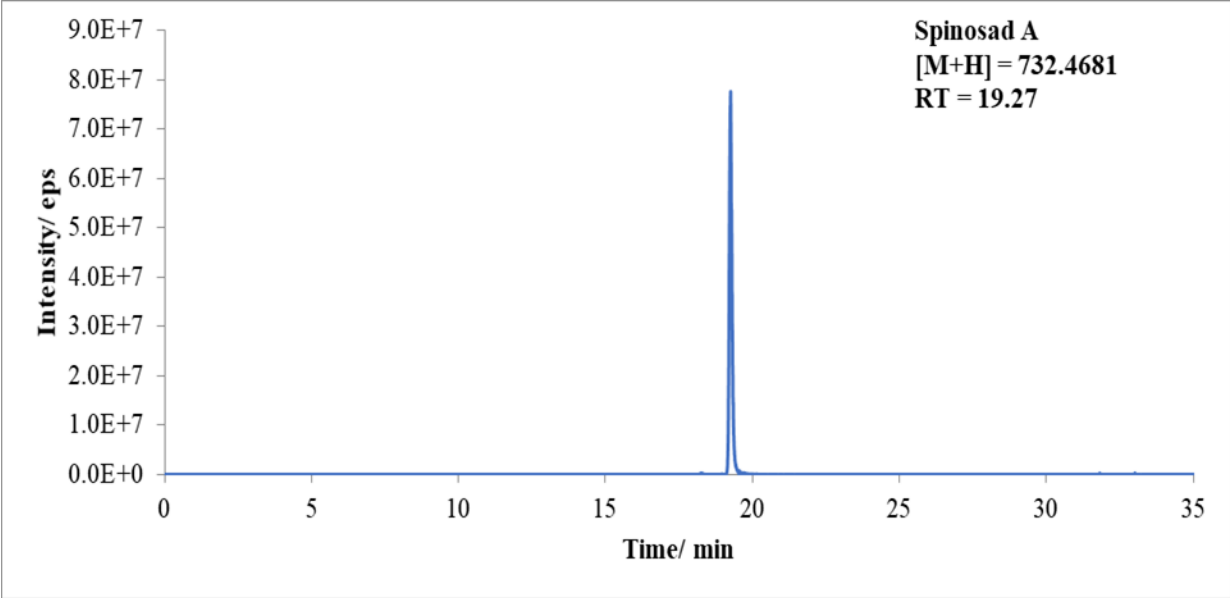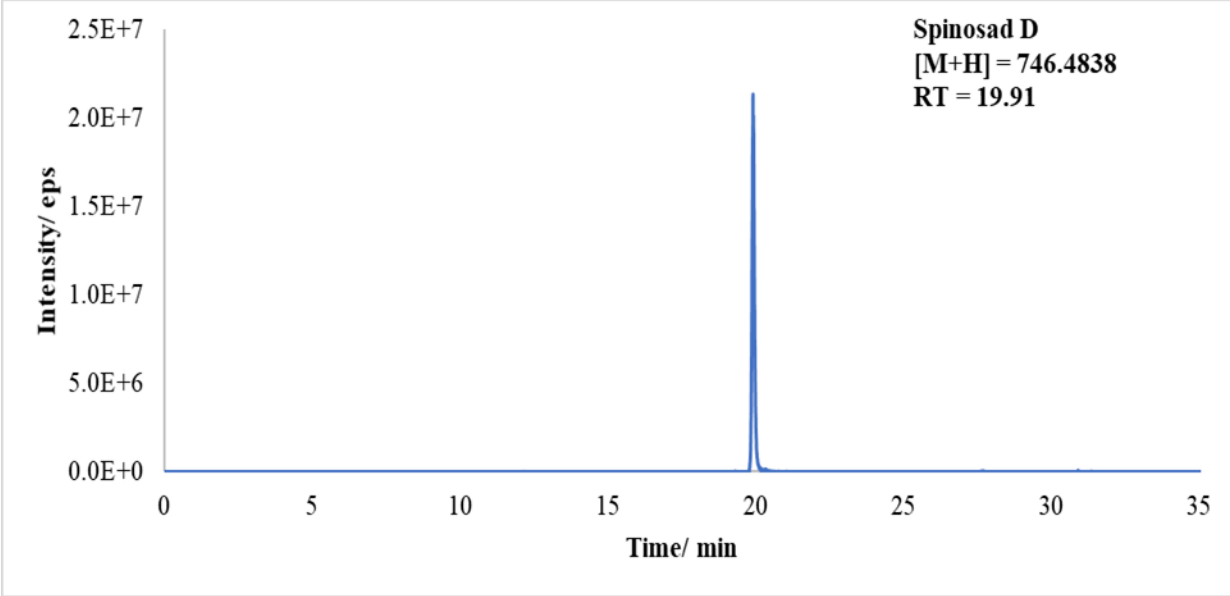

Fig. S2. The total ion chromatogram of the target analytes in the standard solution (negative mode)

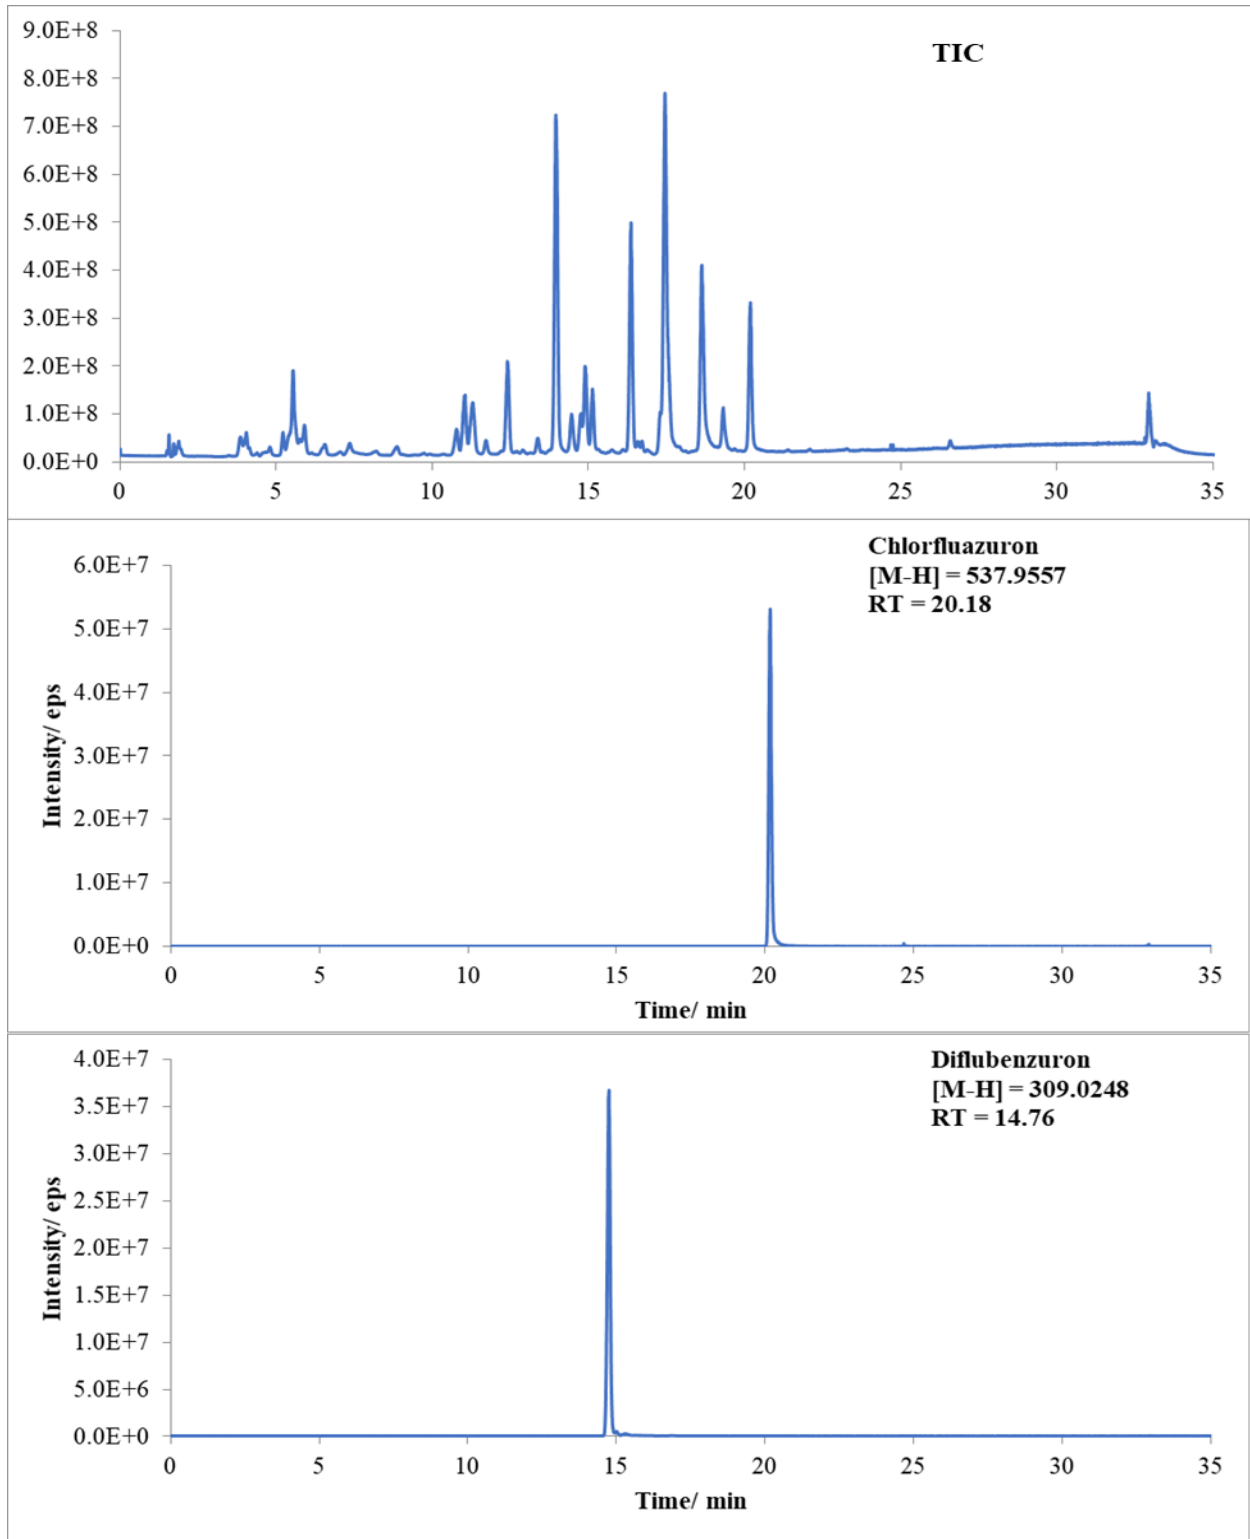

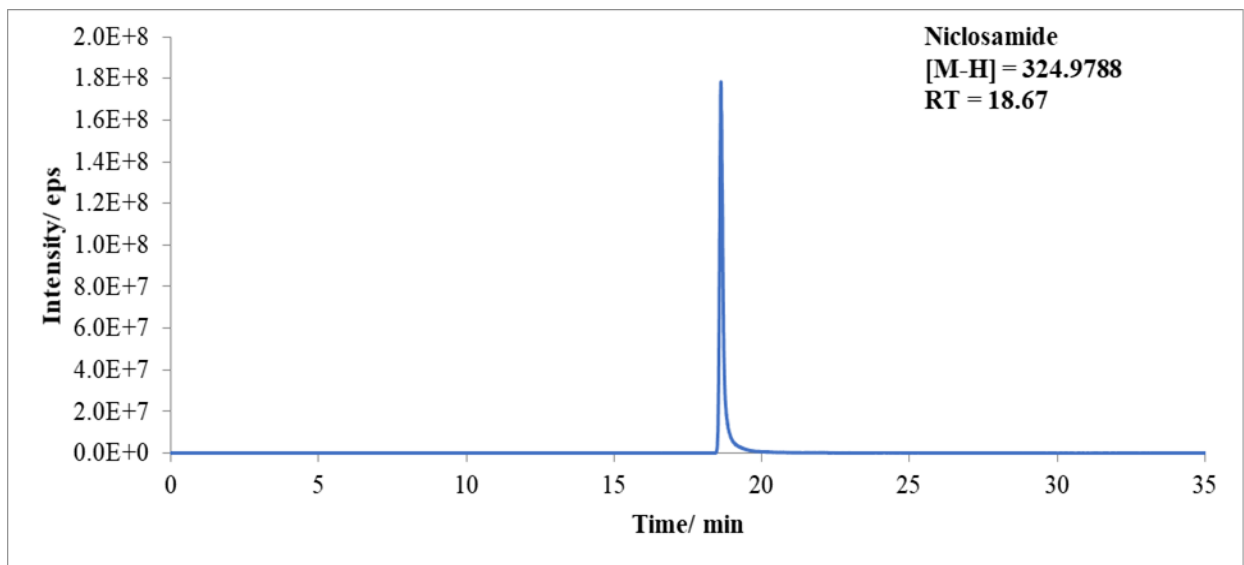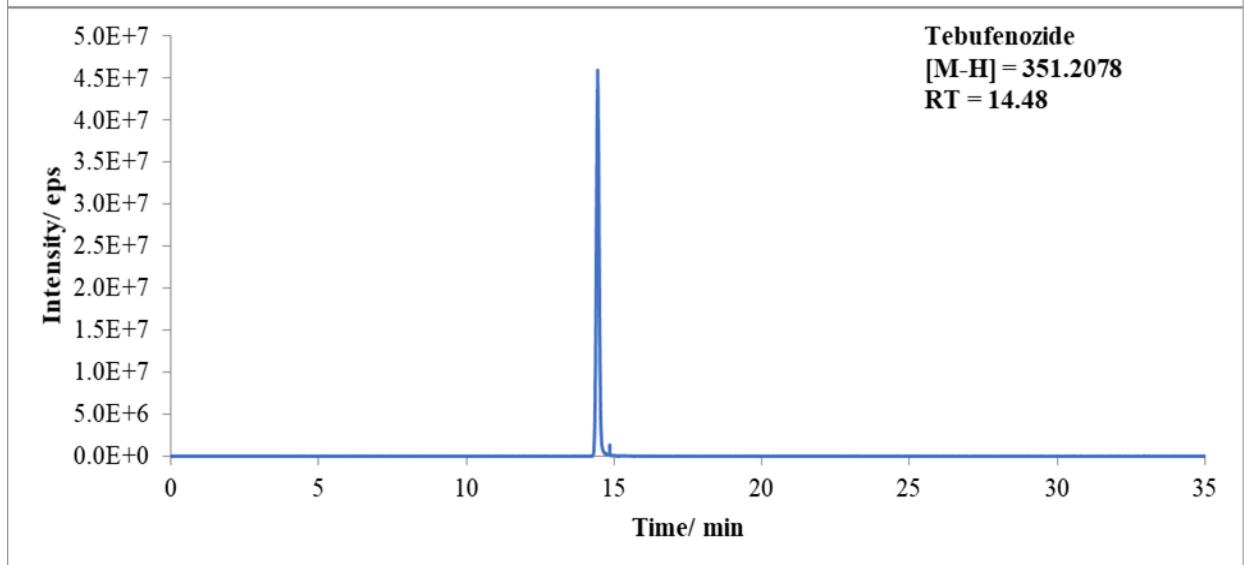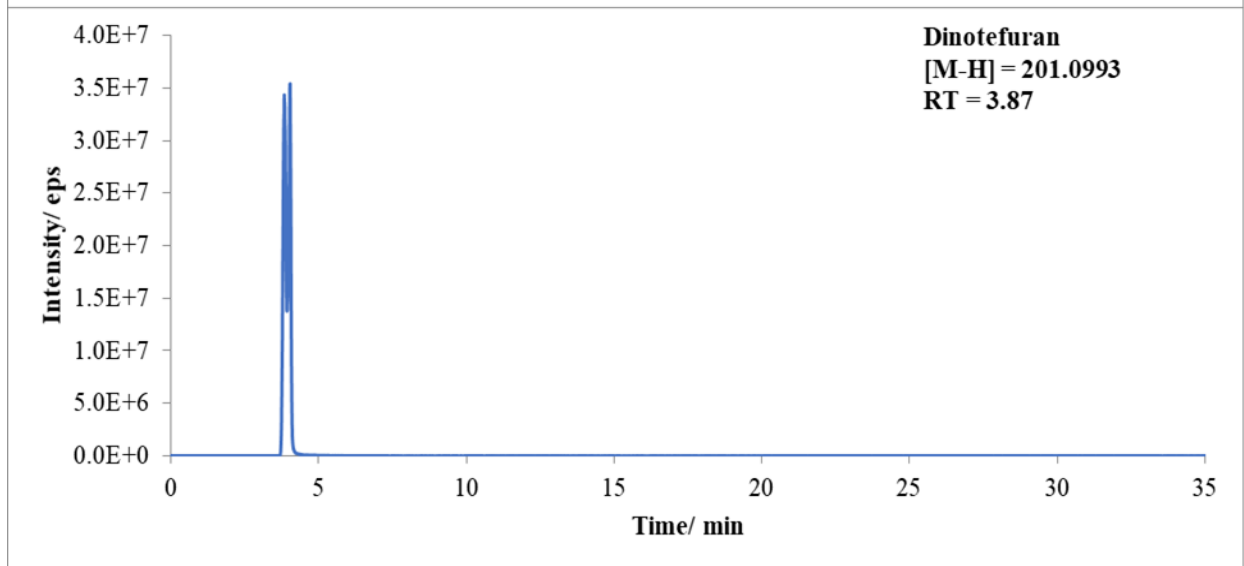

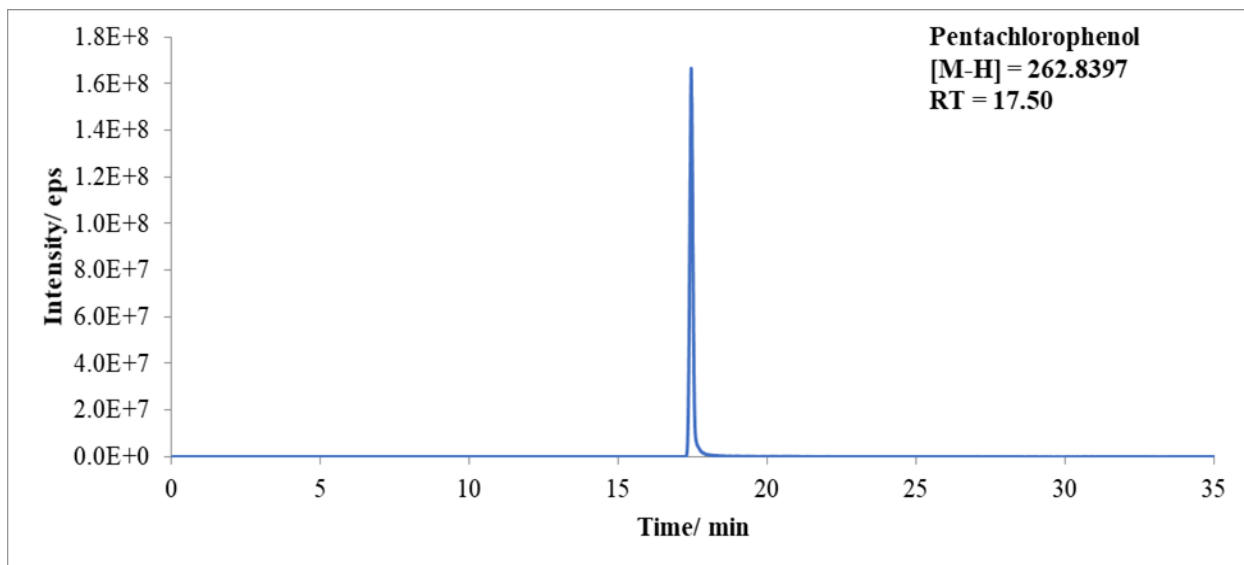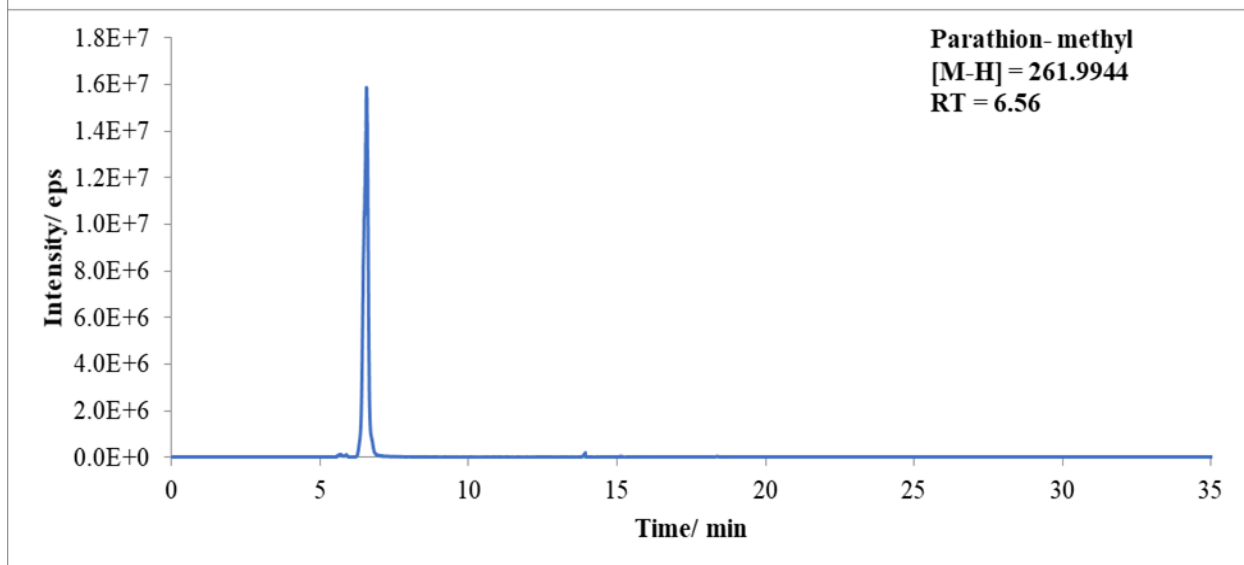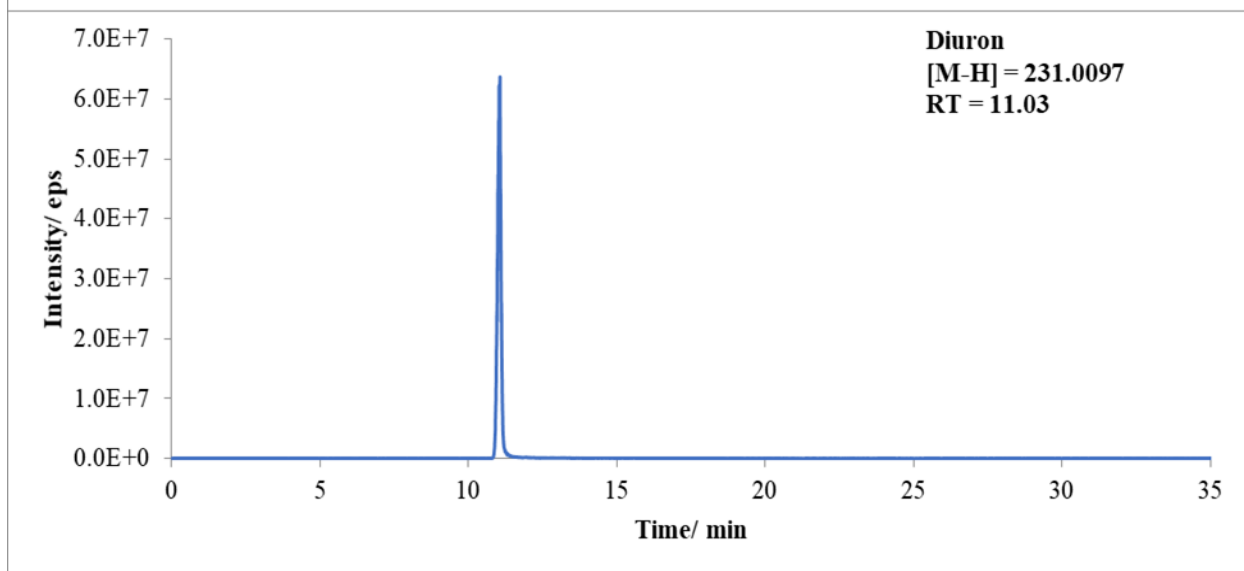

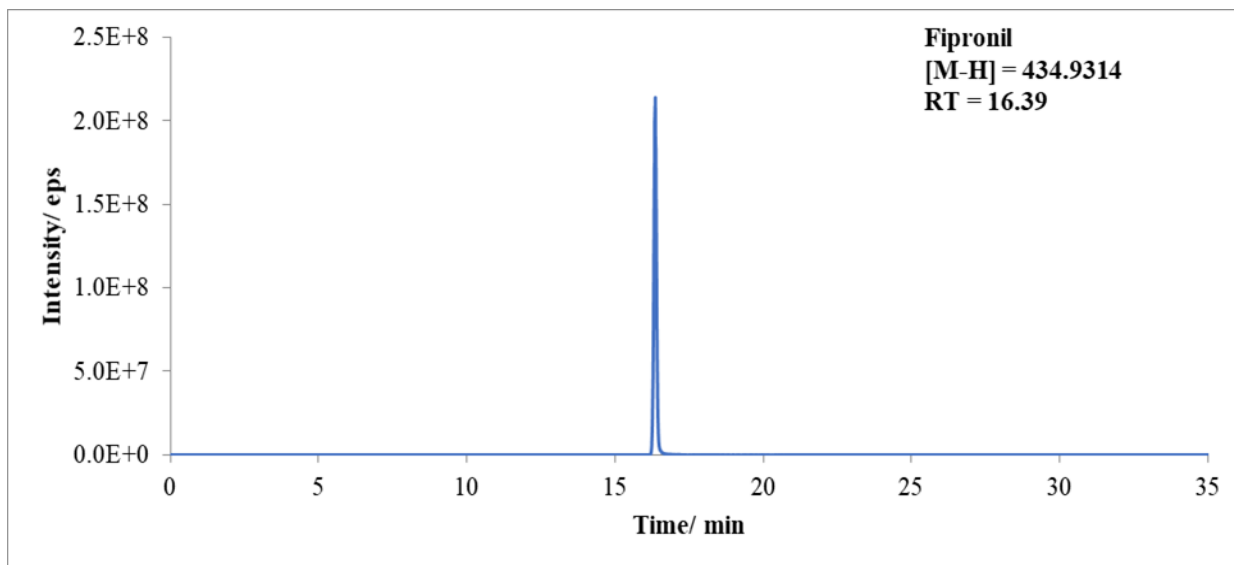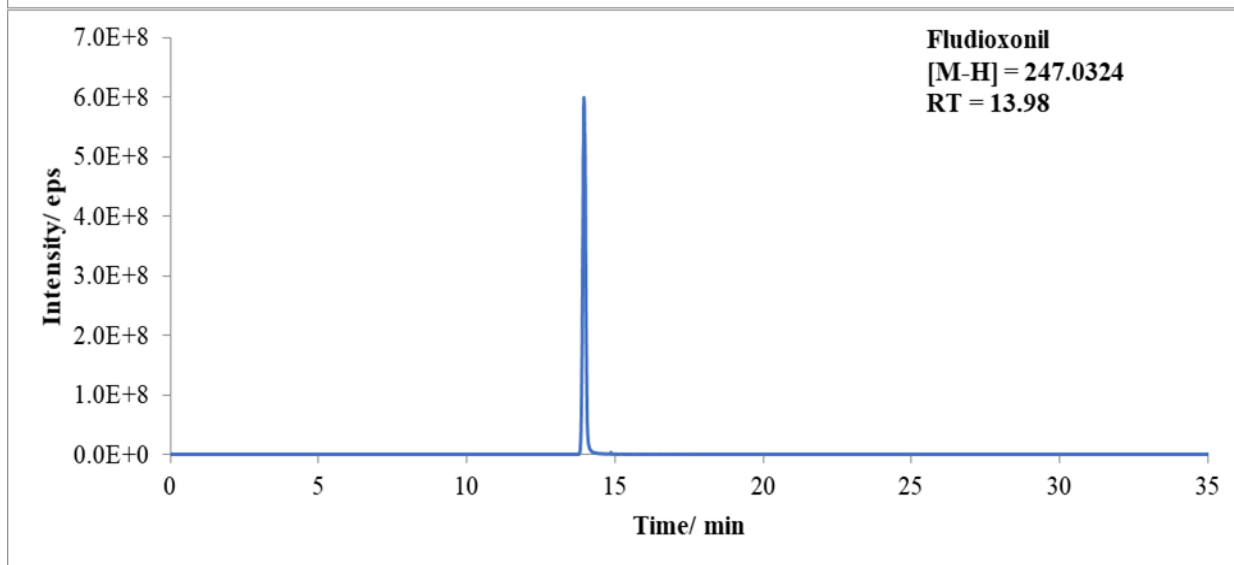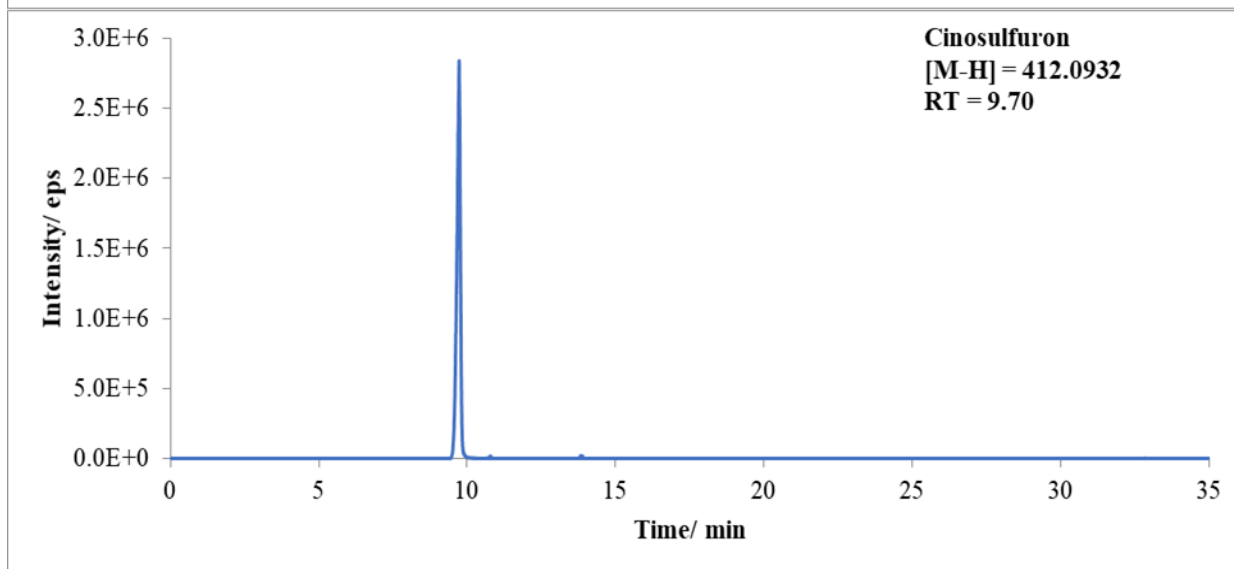

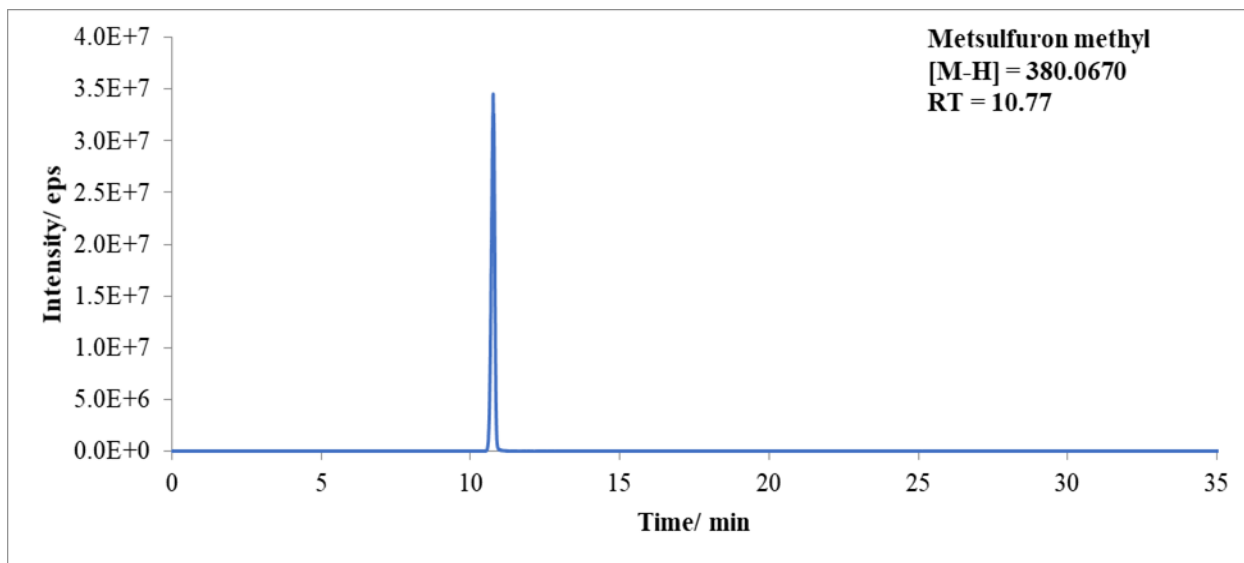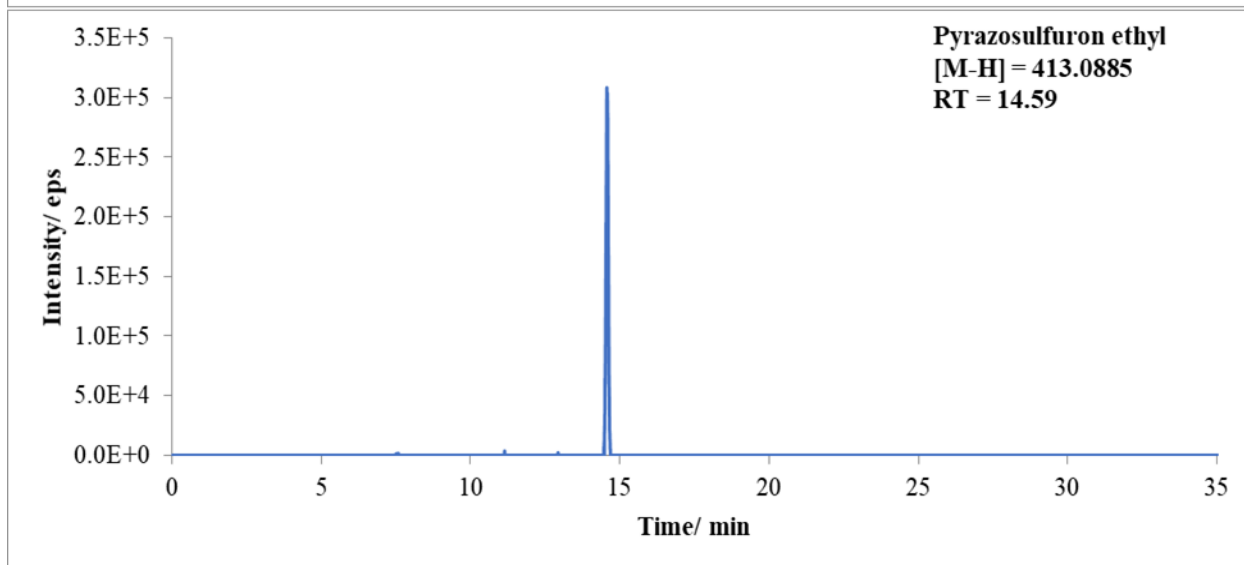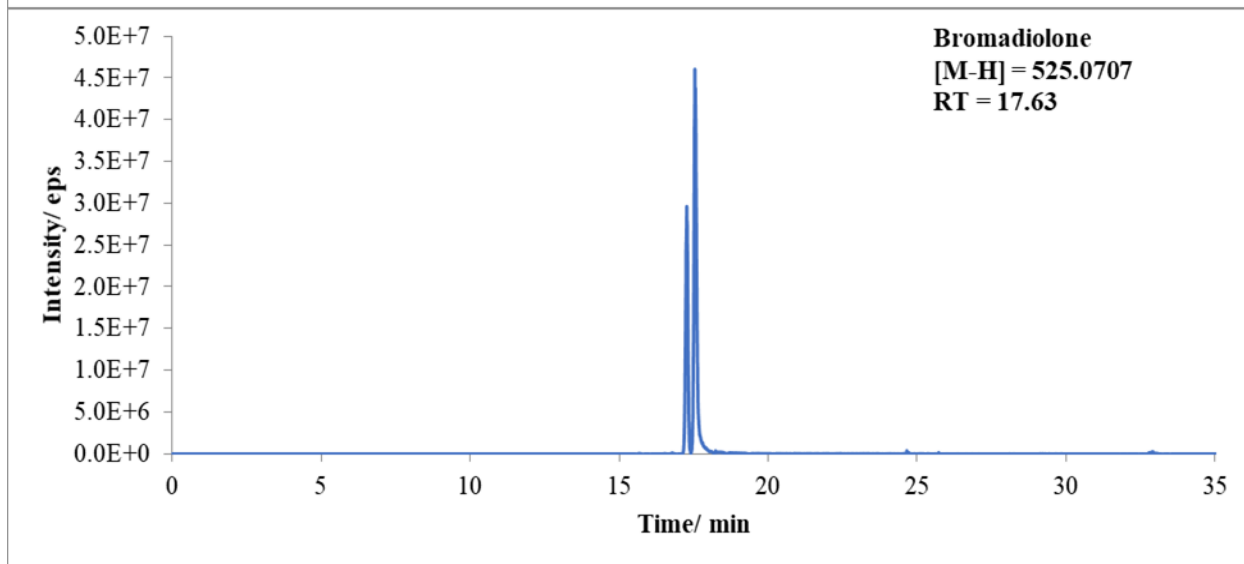

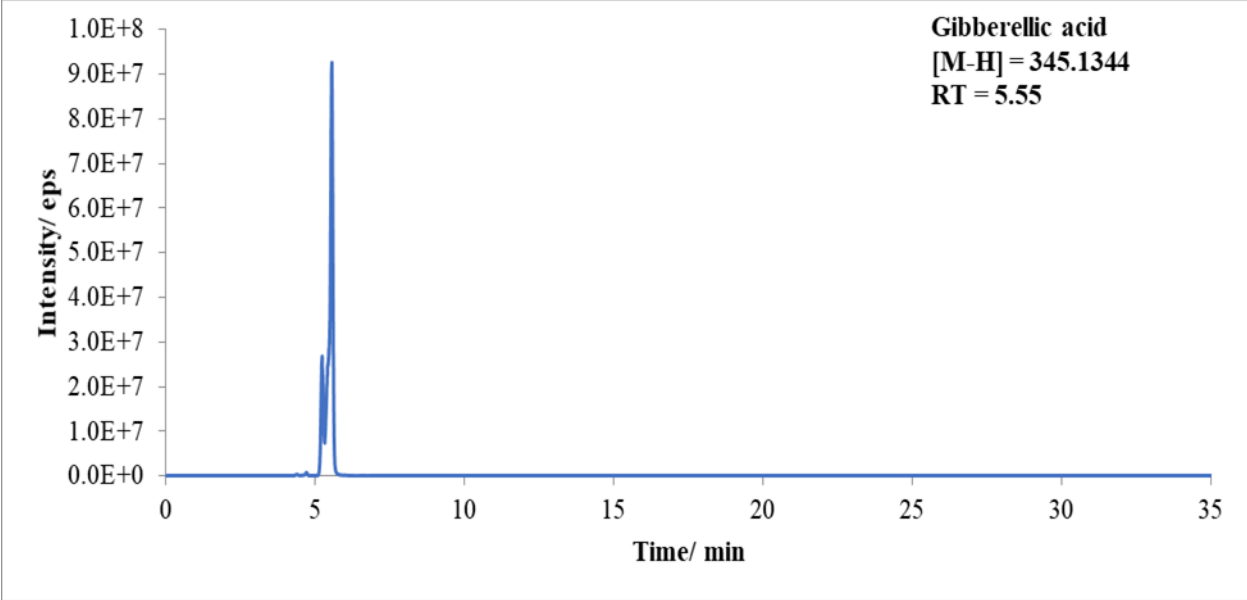

Fig. S3. The total ion chromatogram and extracted ion chromatogram of the target analytes in the matrix match solution (positive mode)

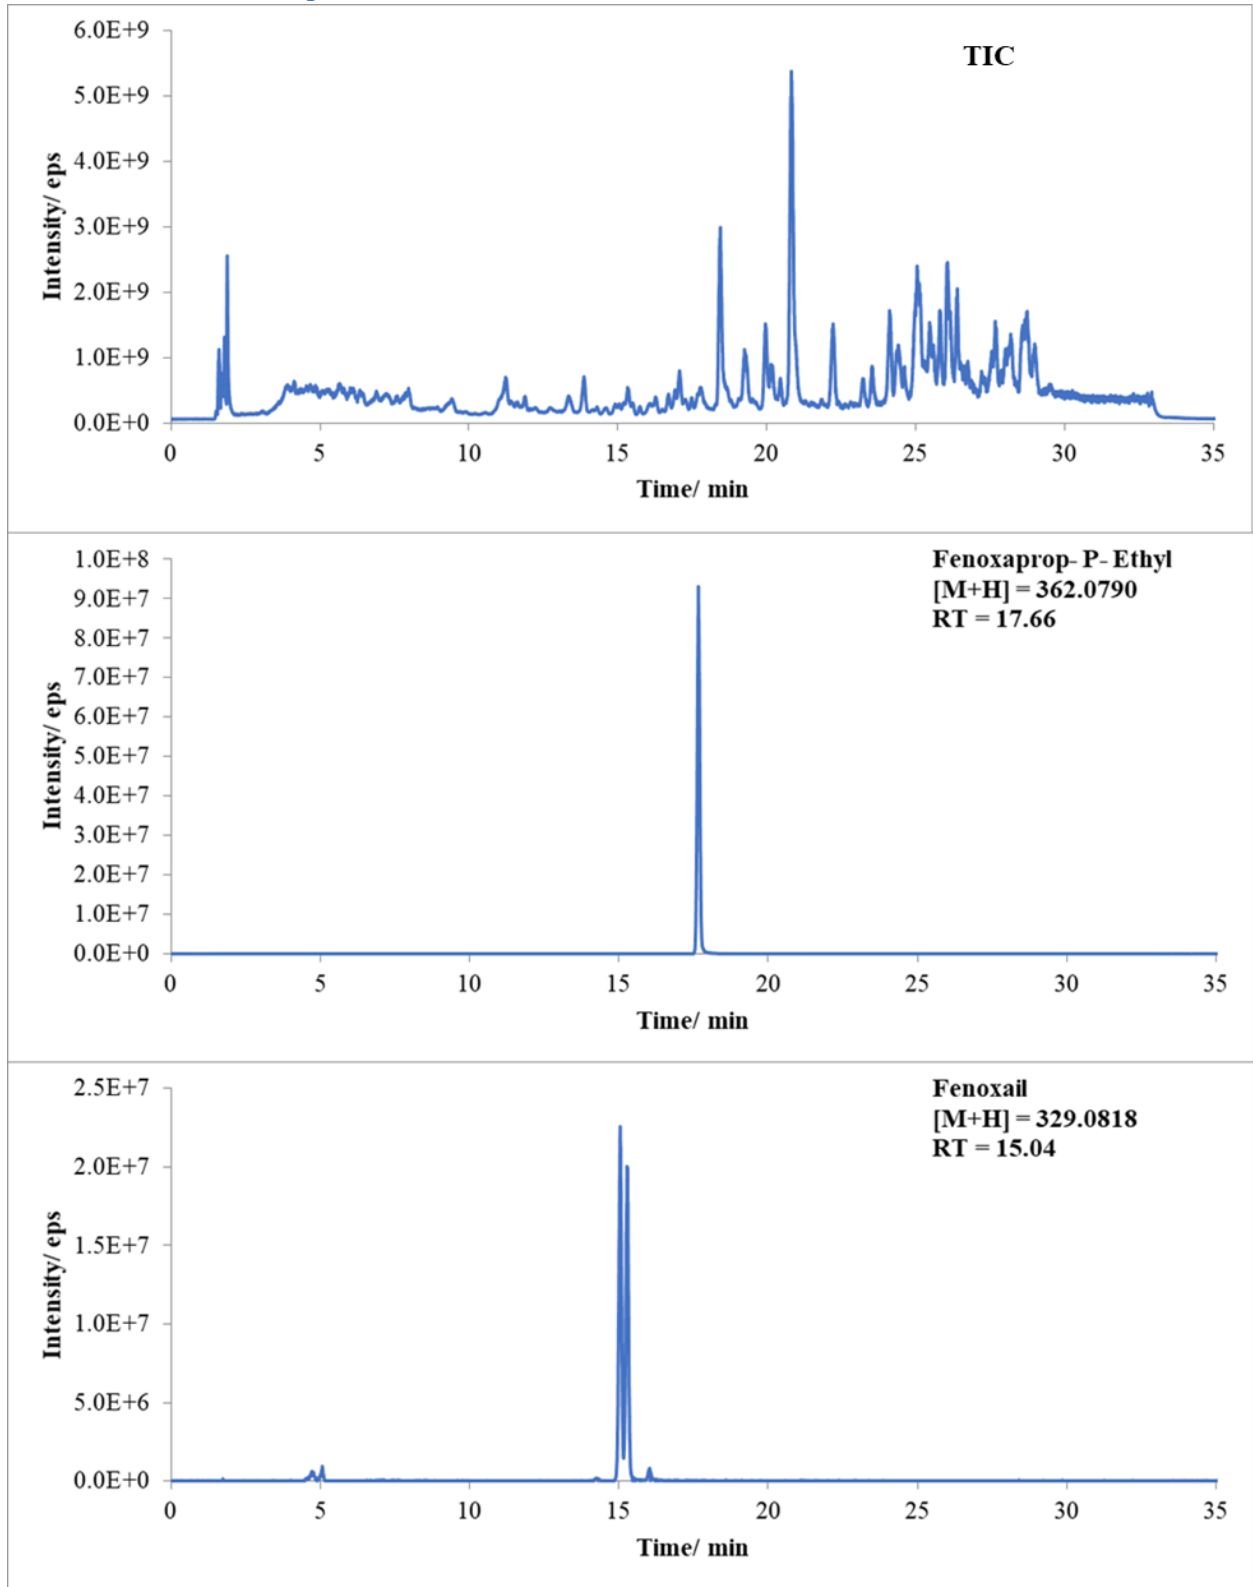



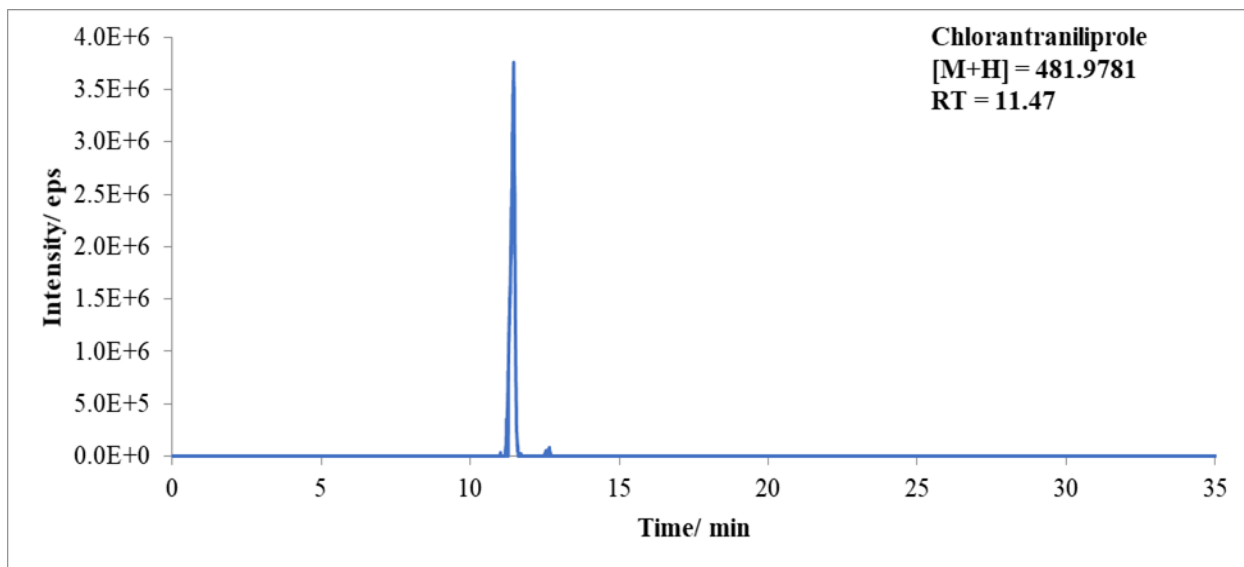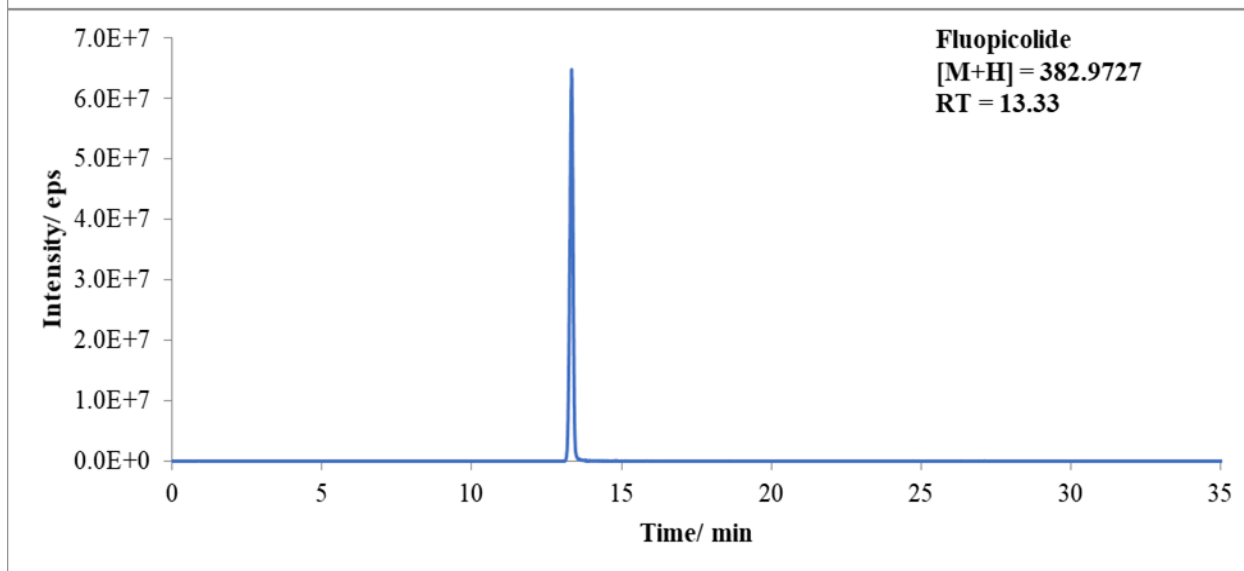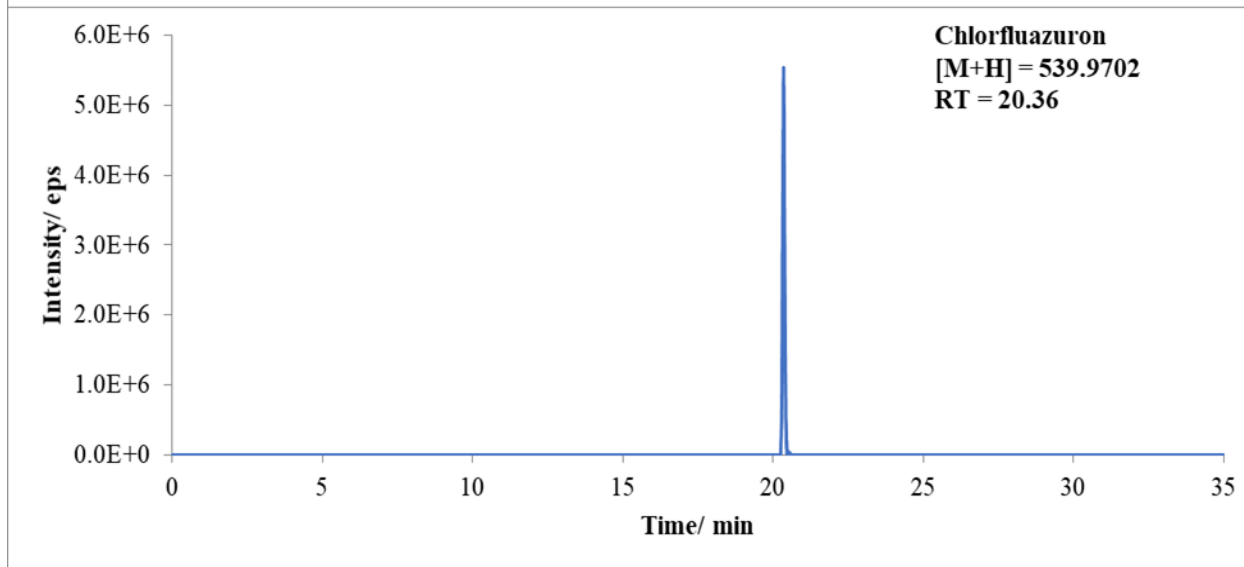

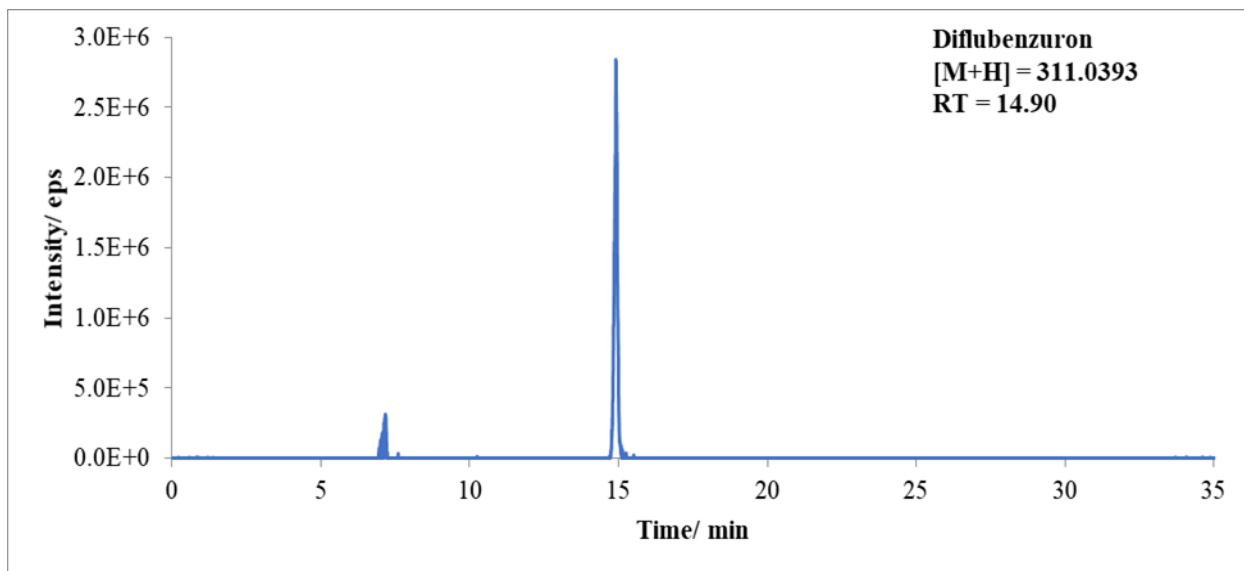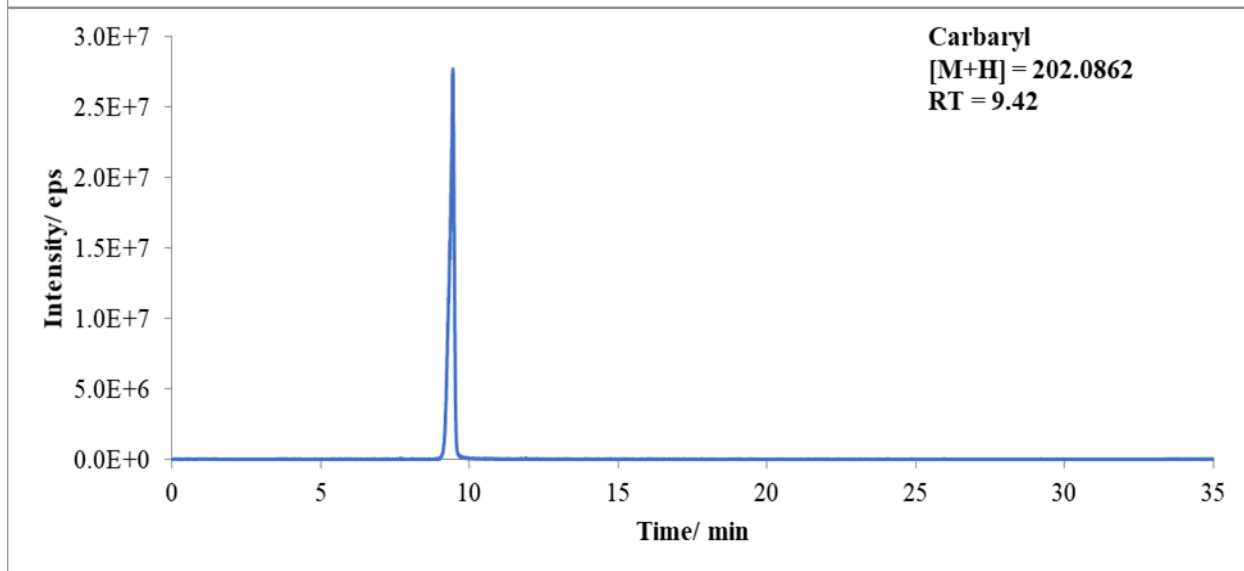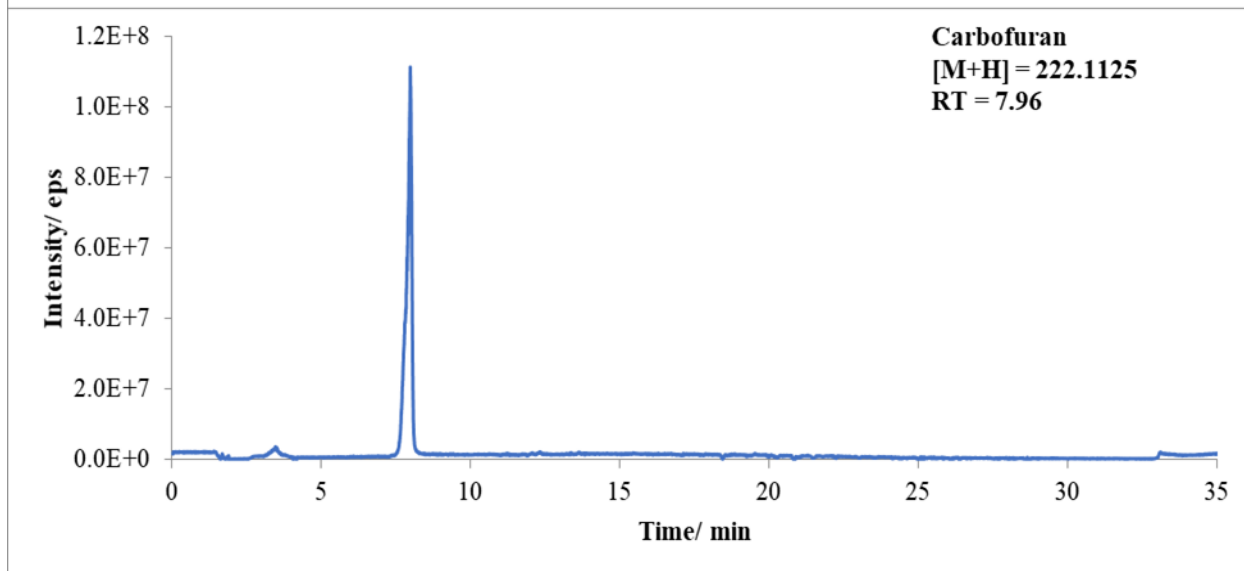

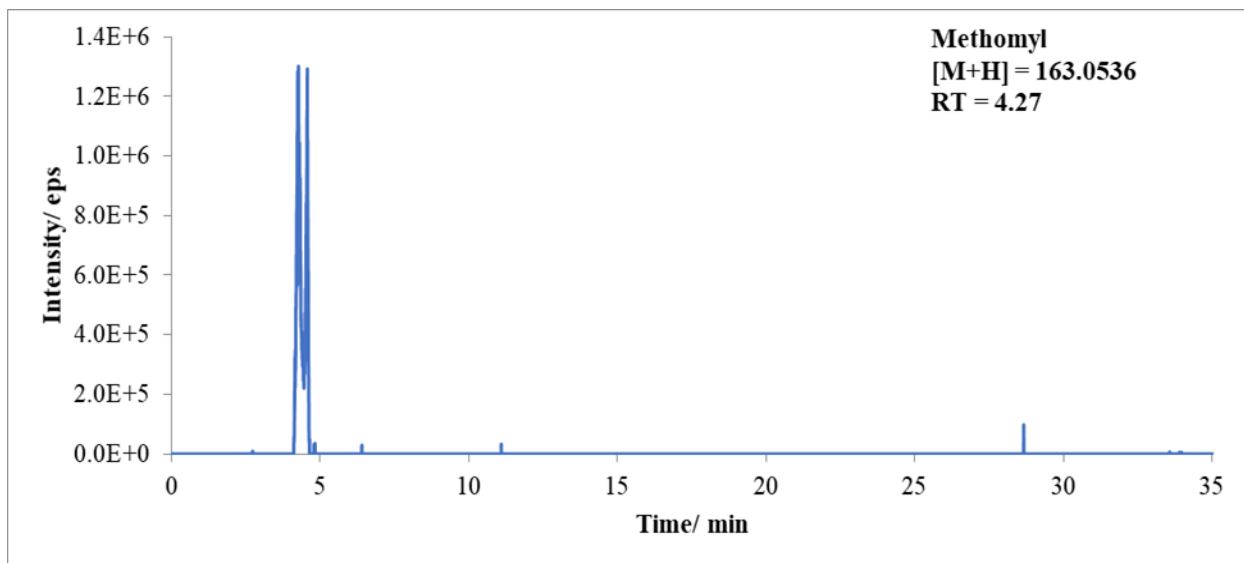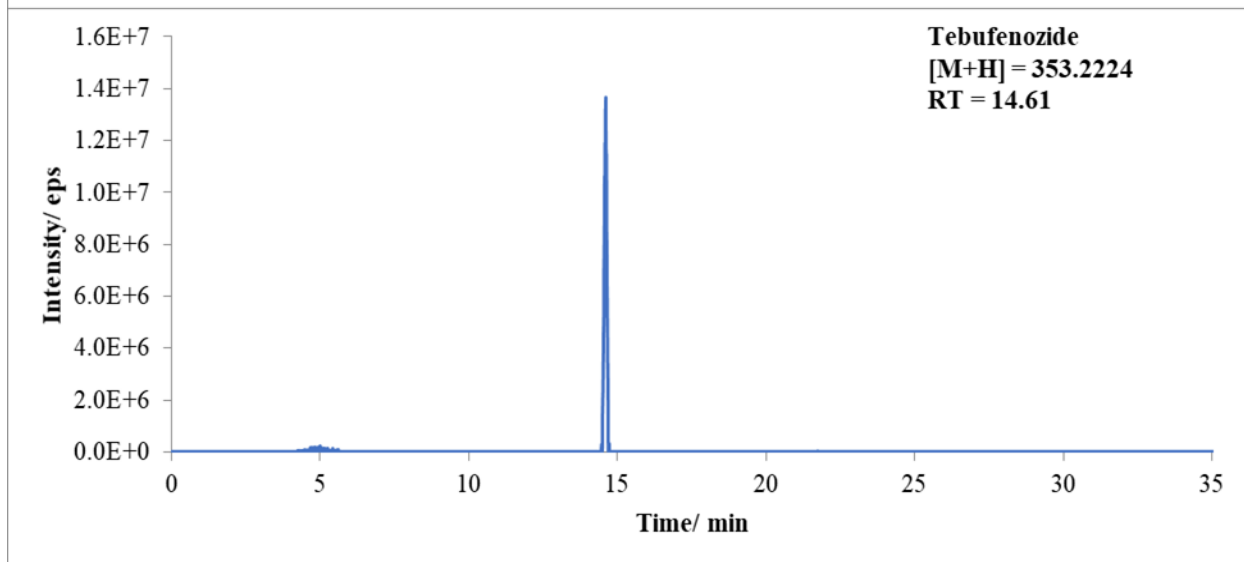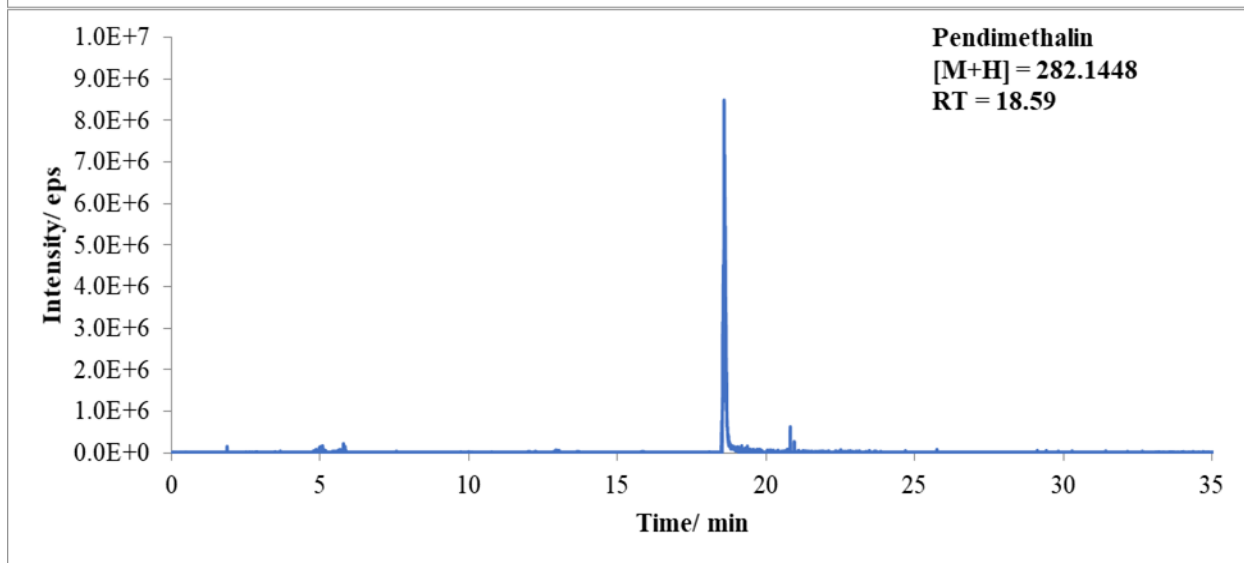

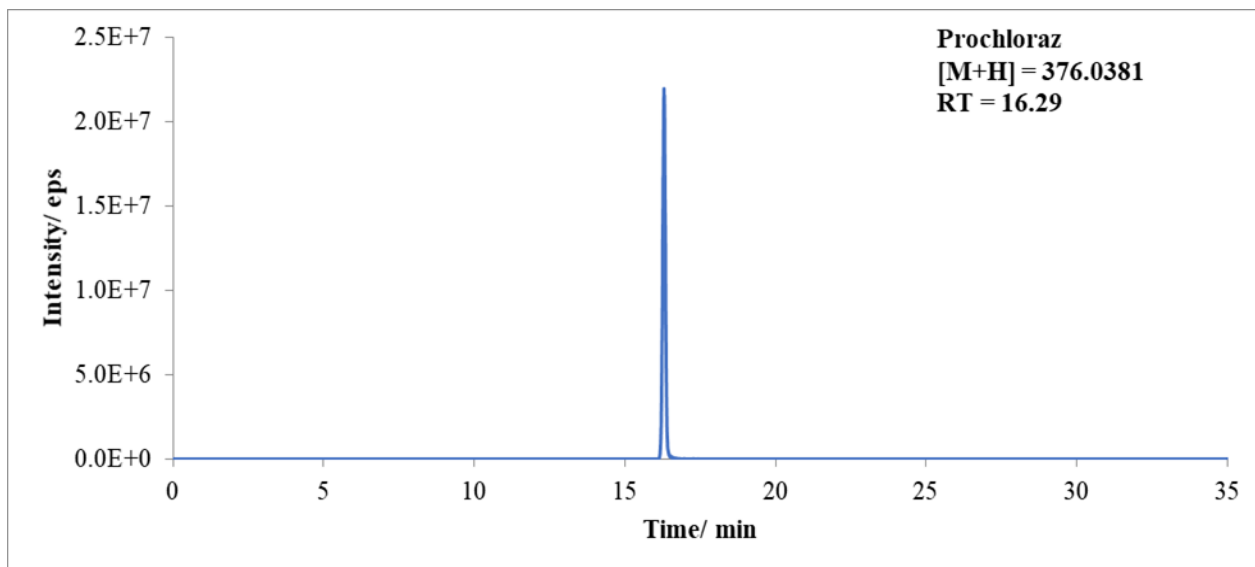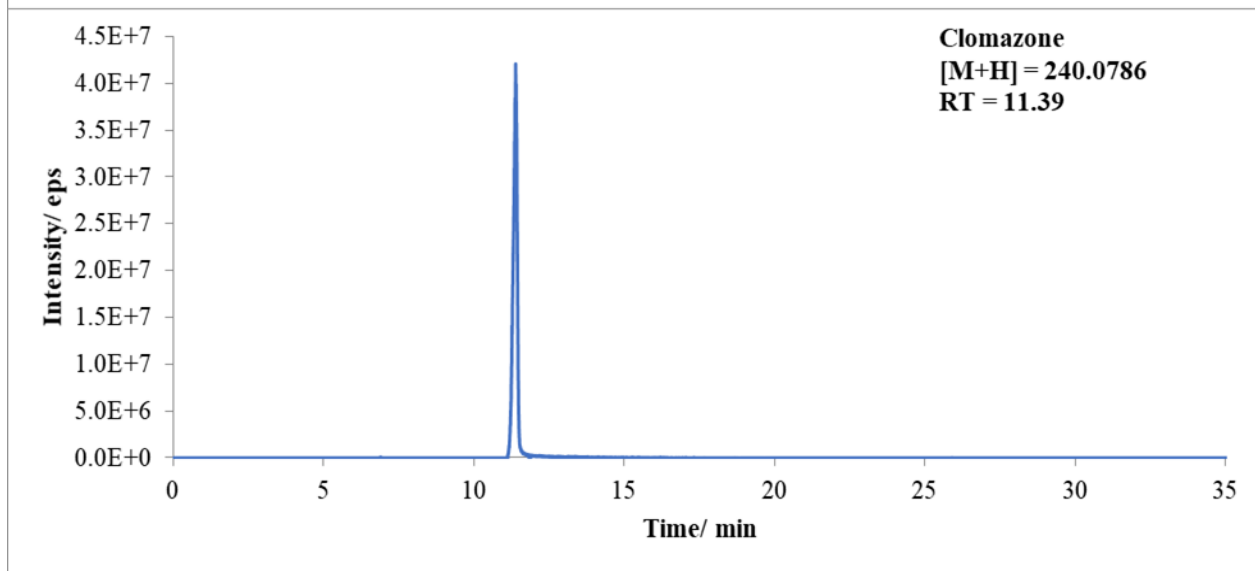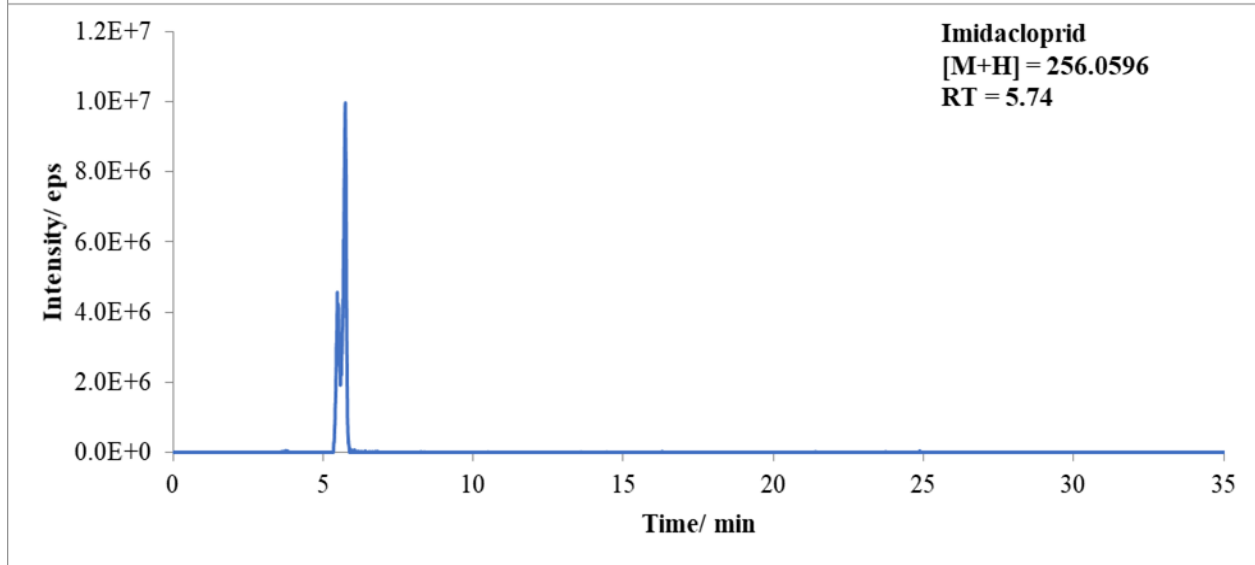

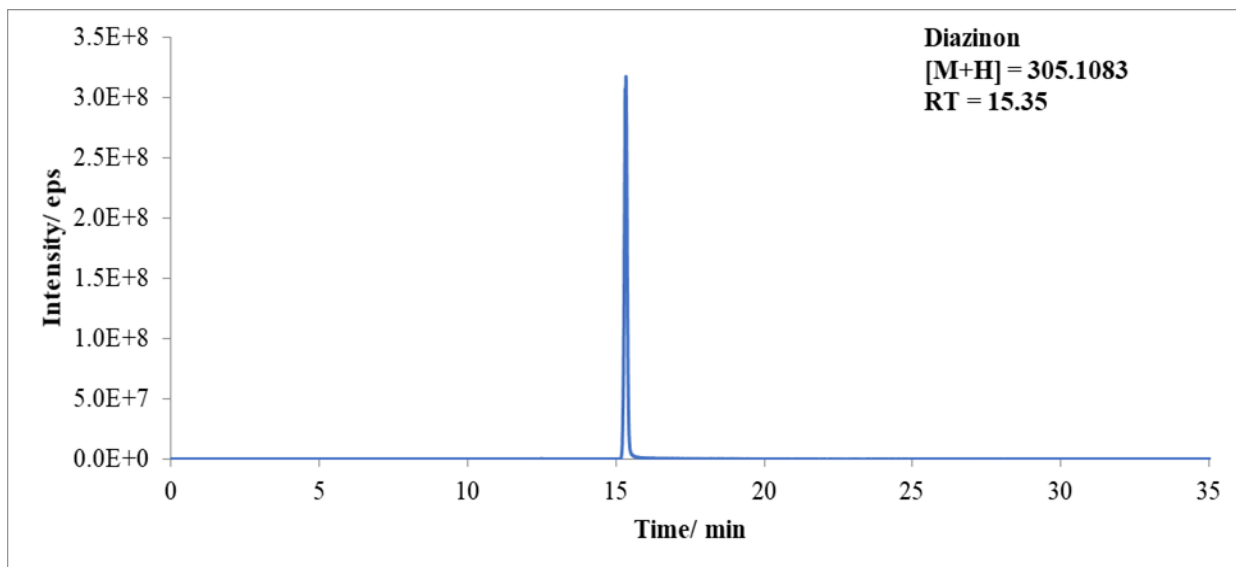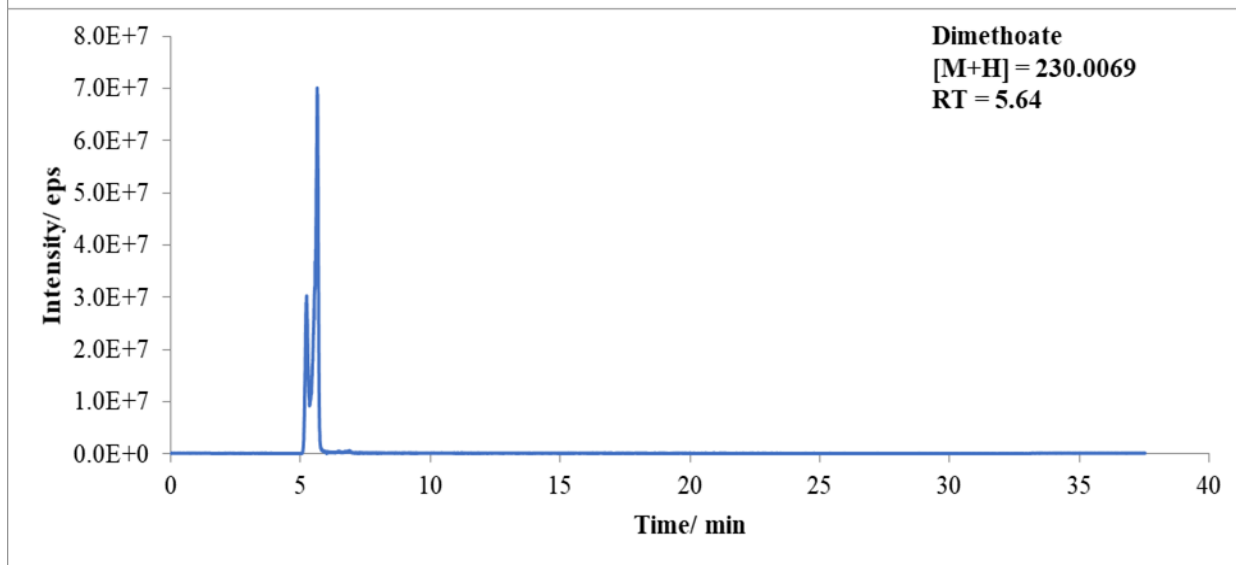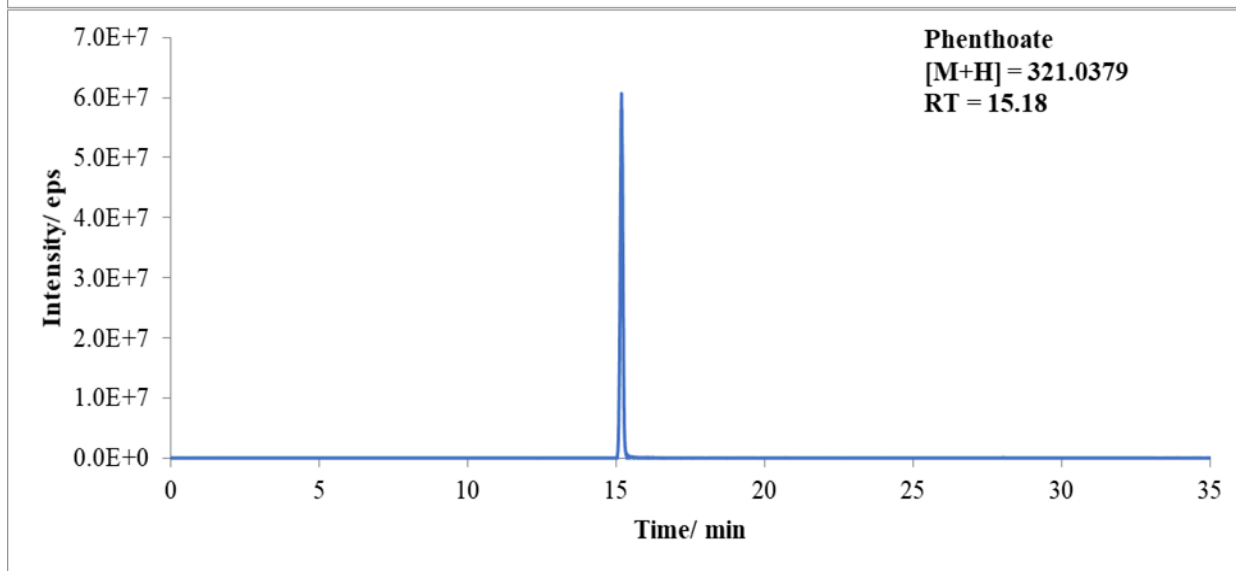

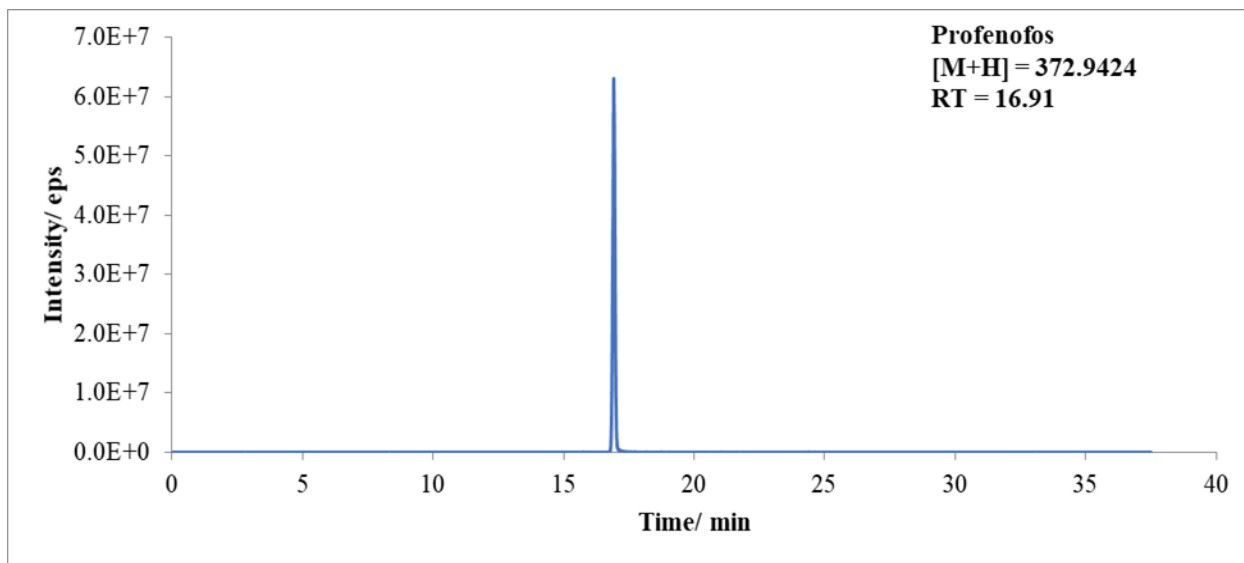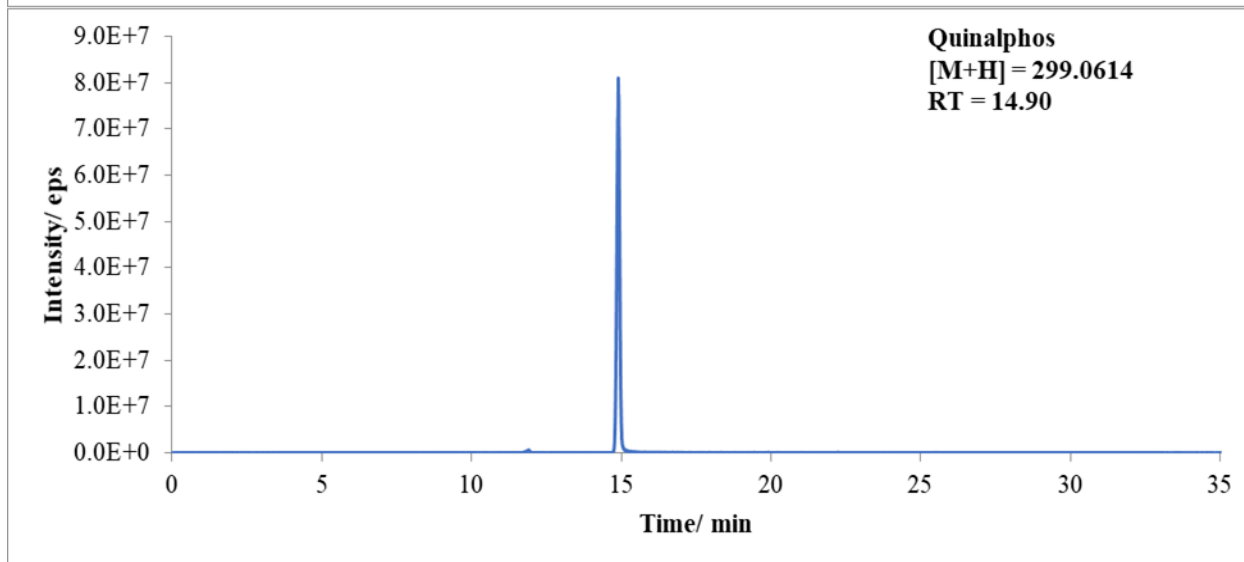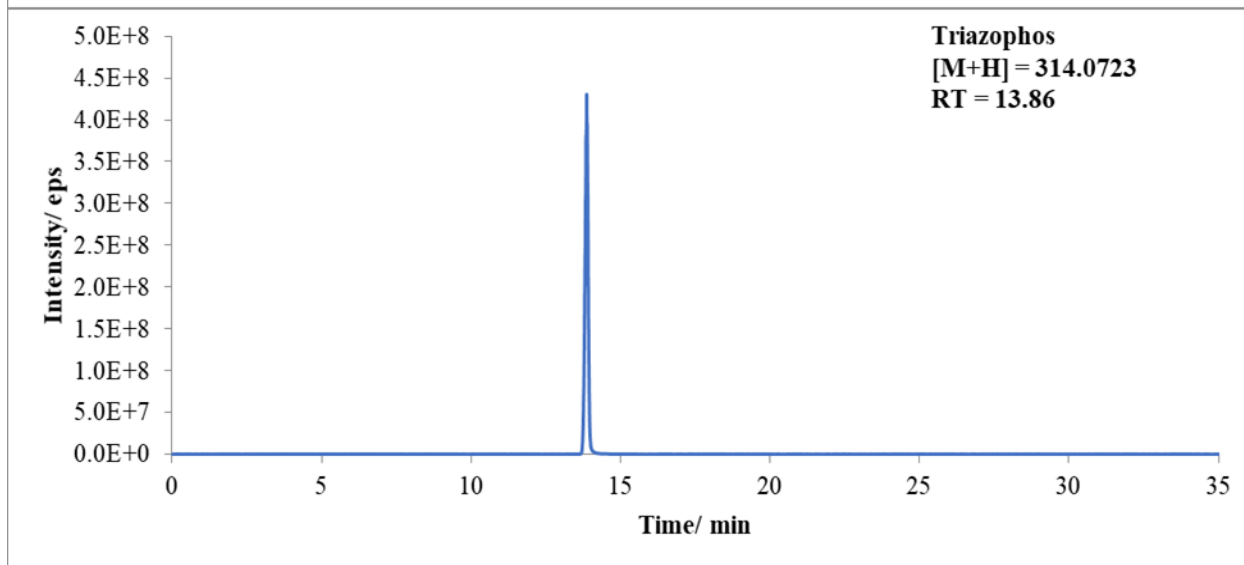

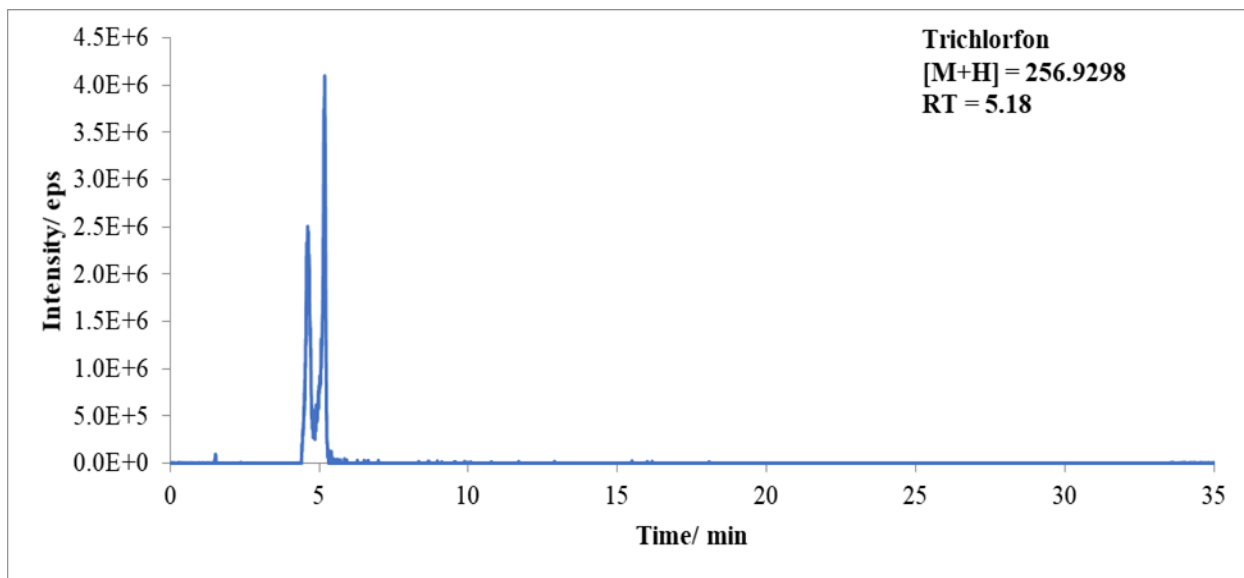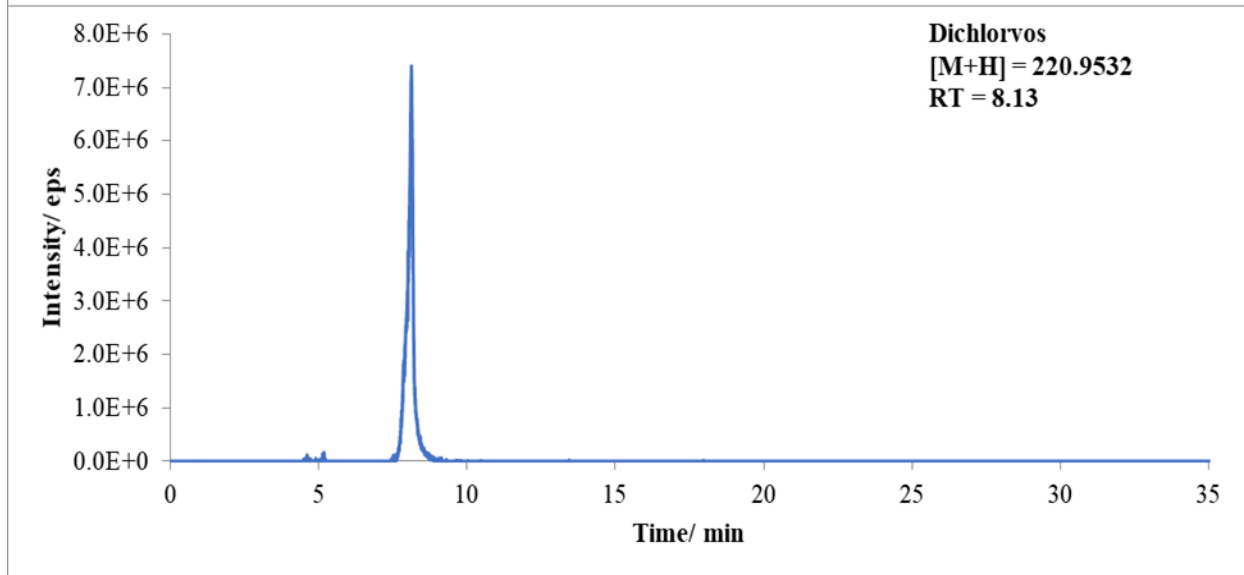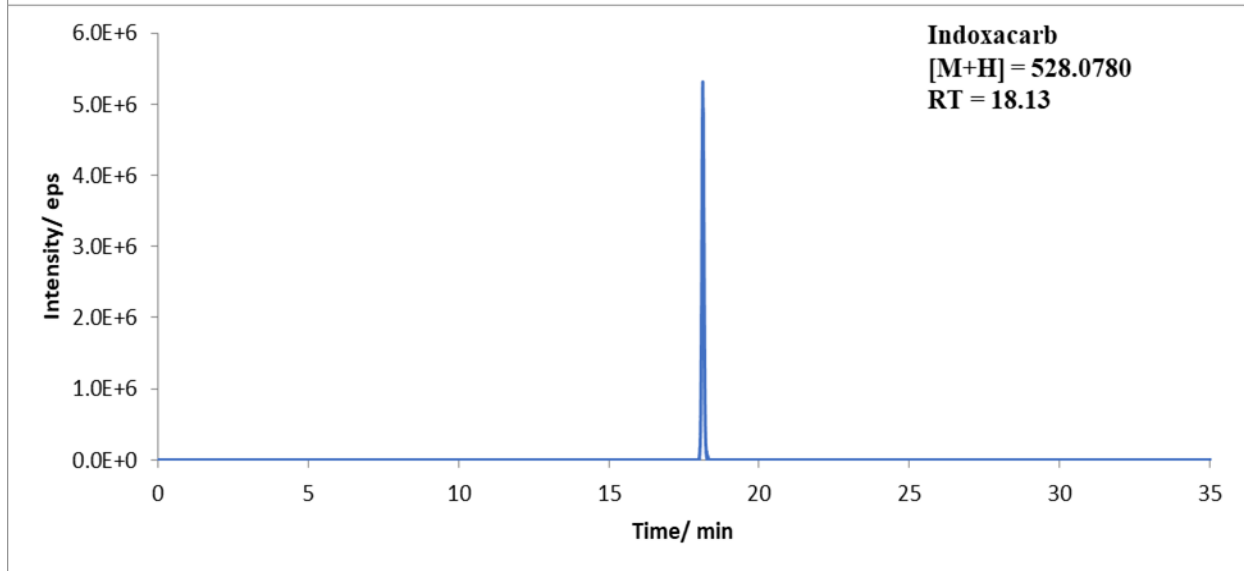

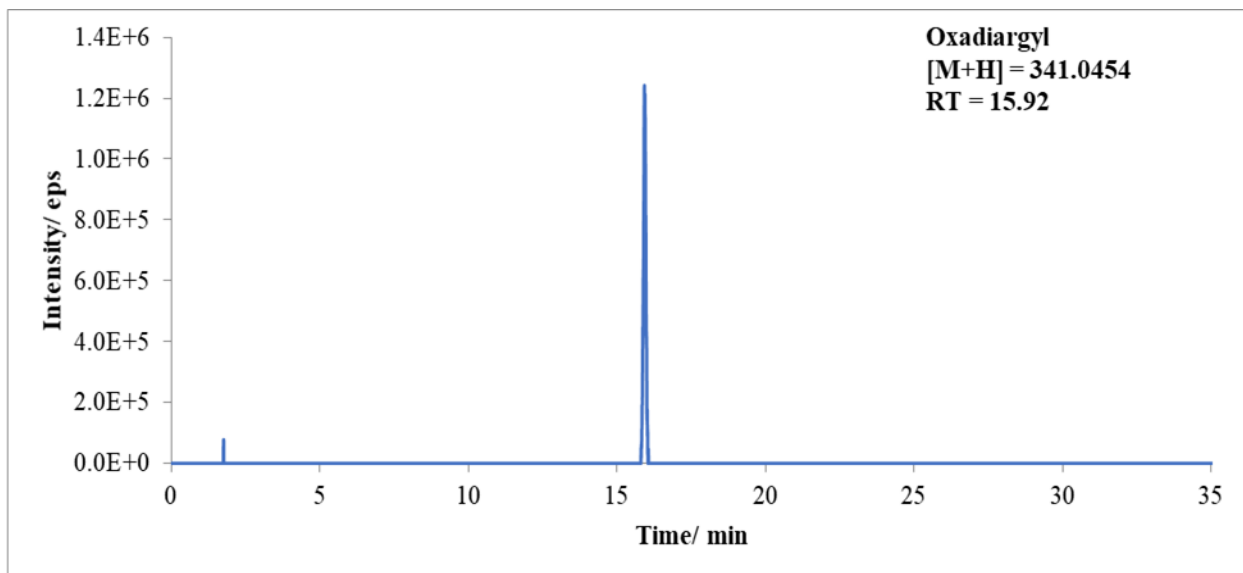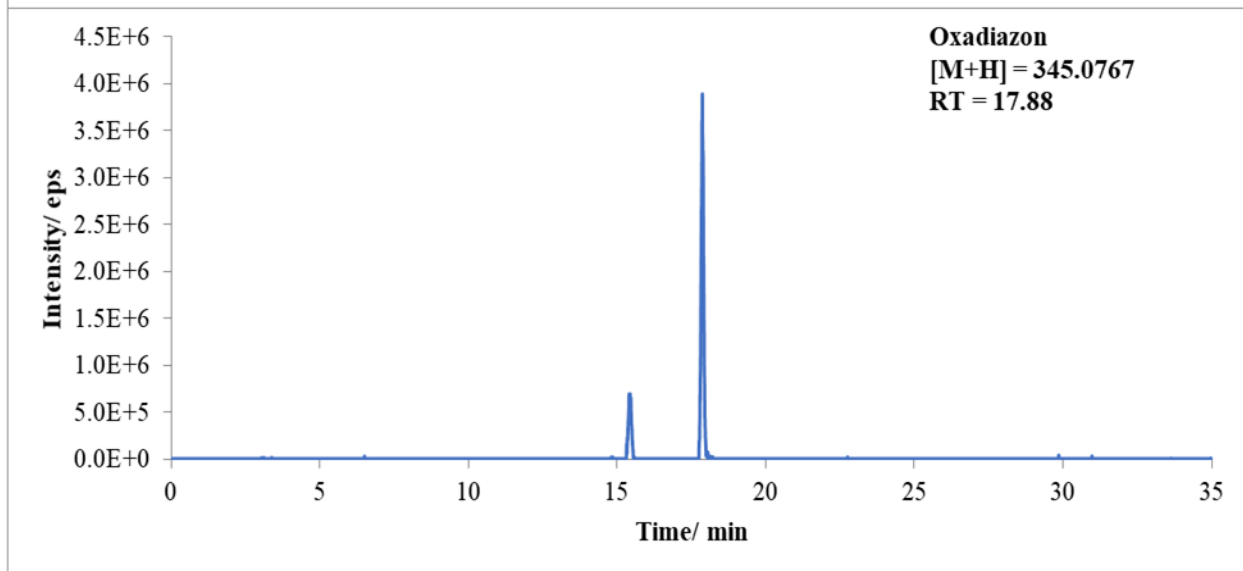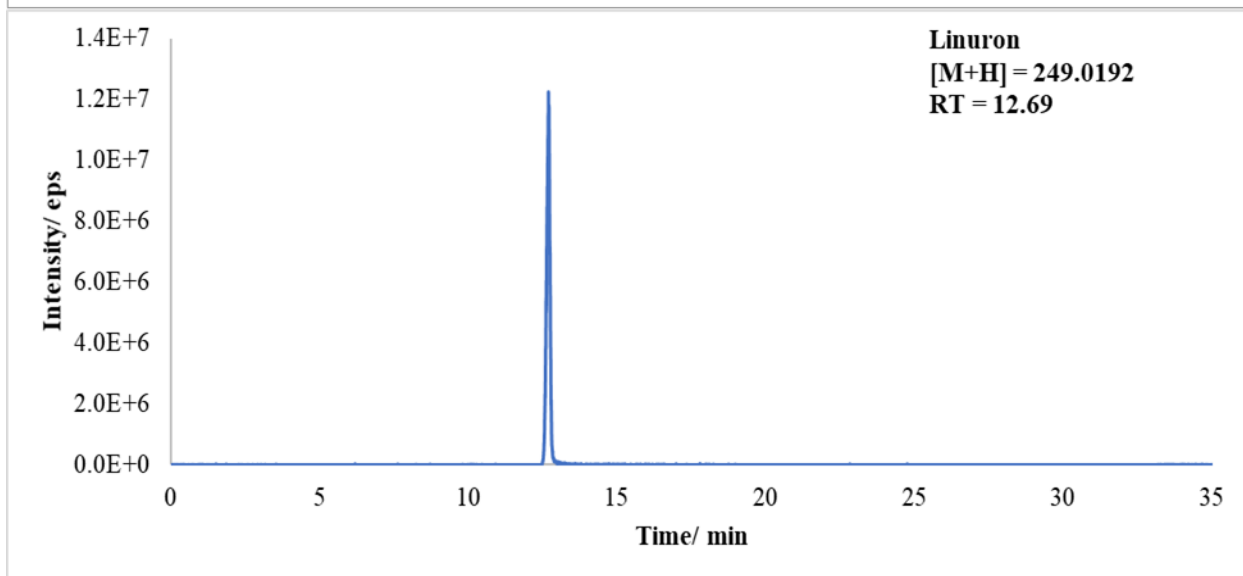



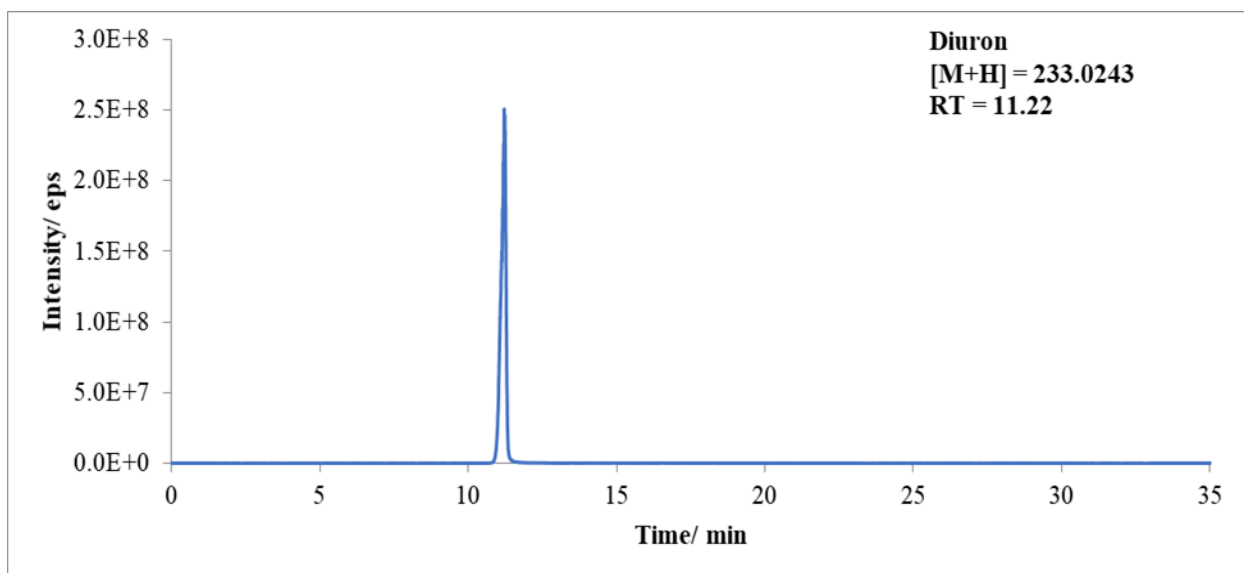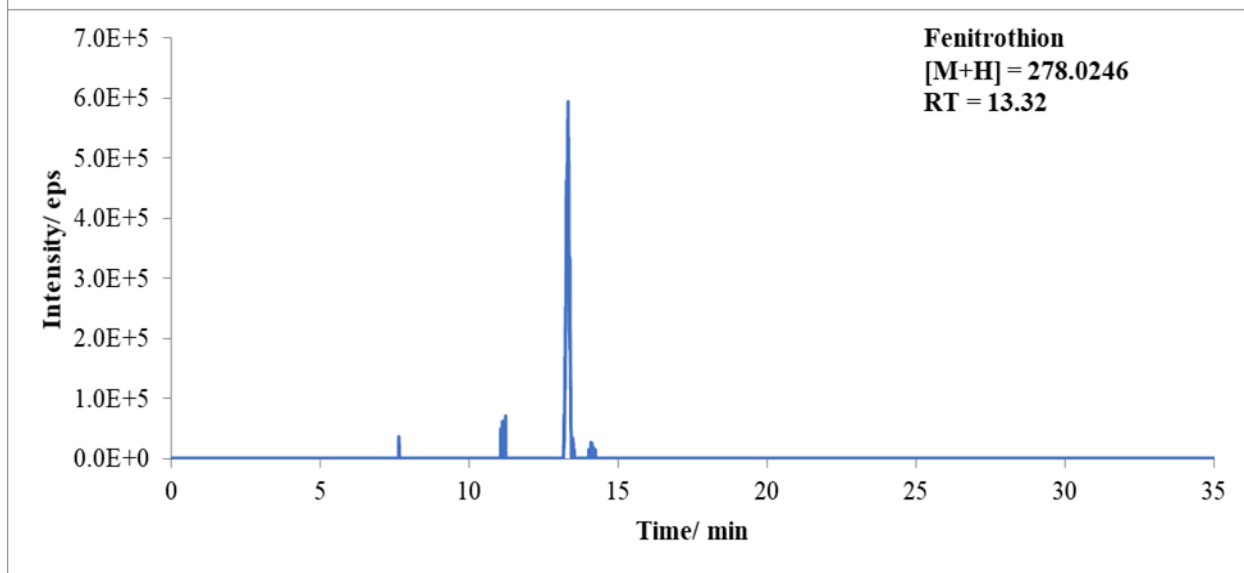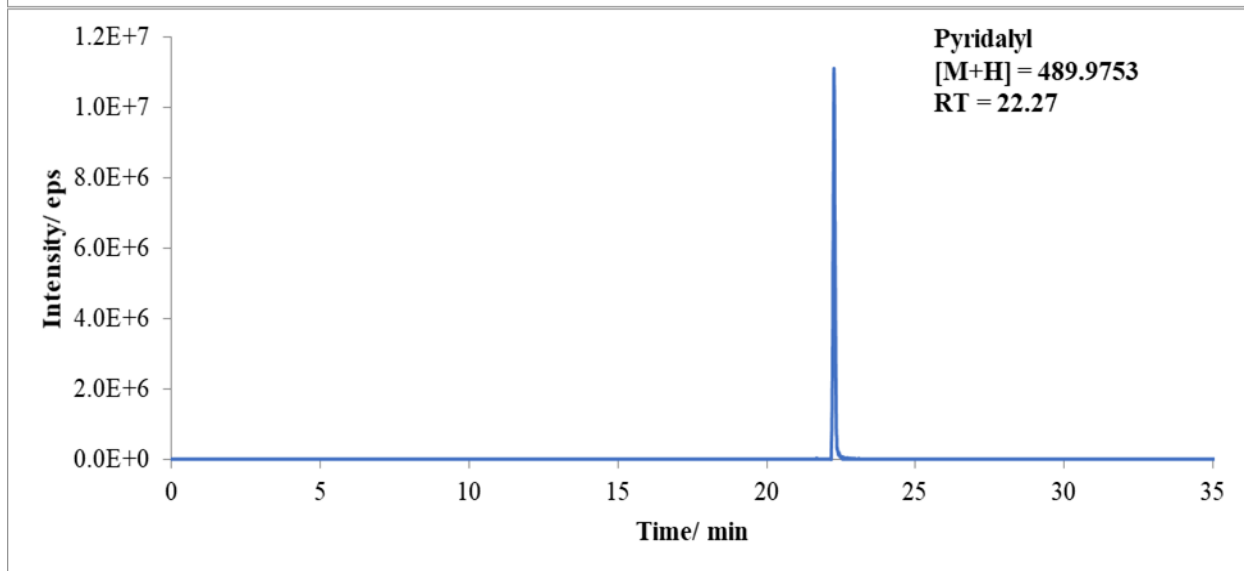

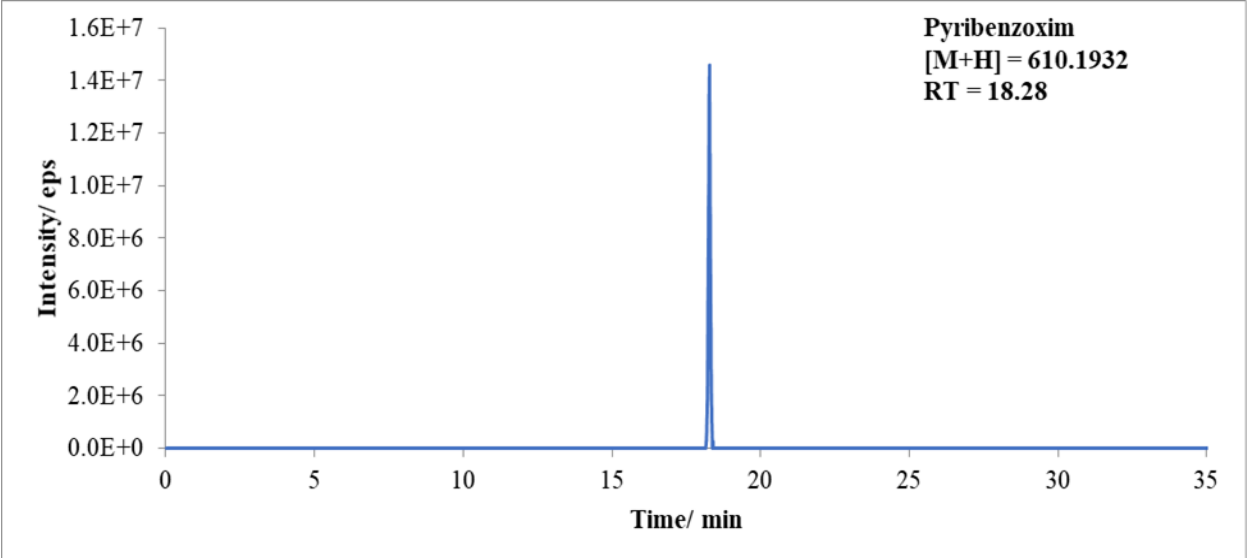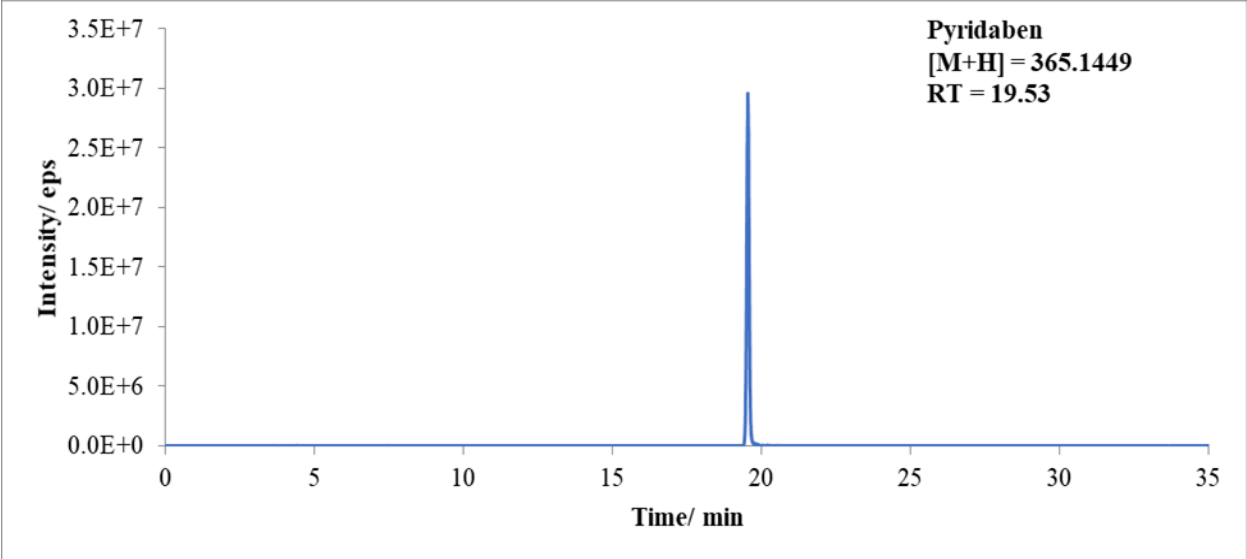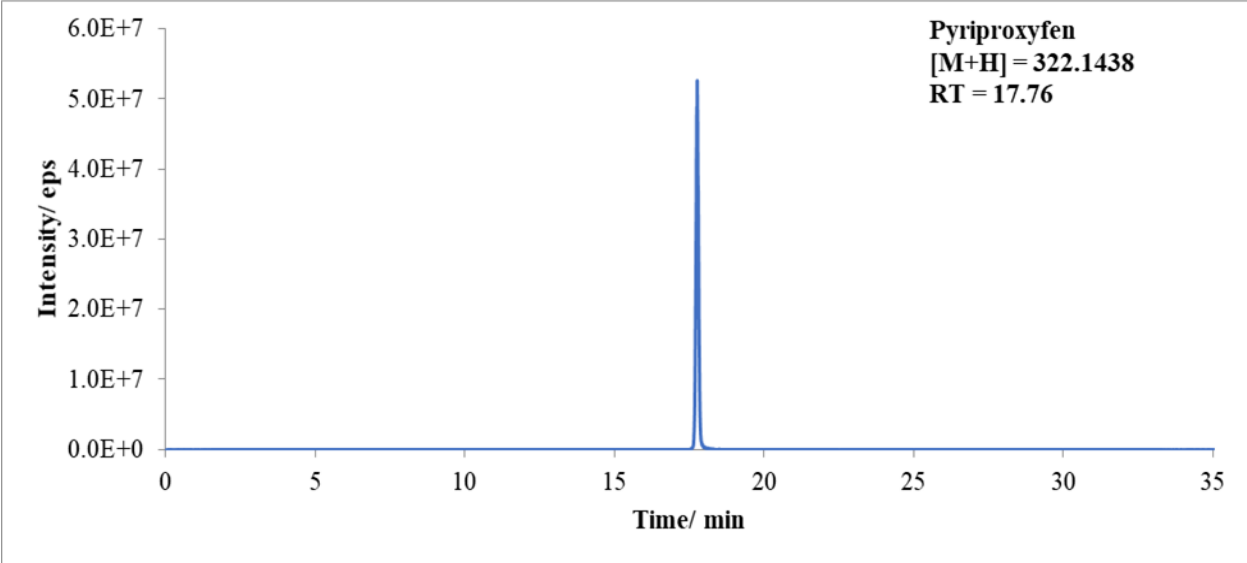

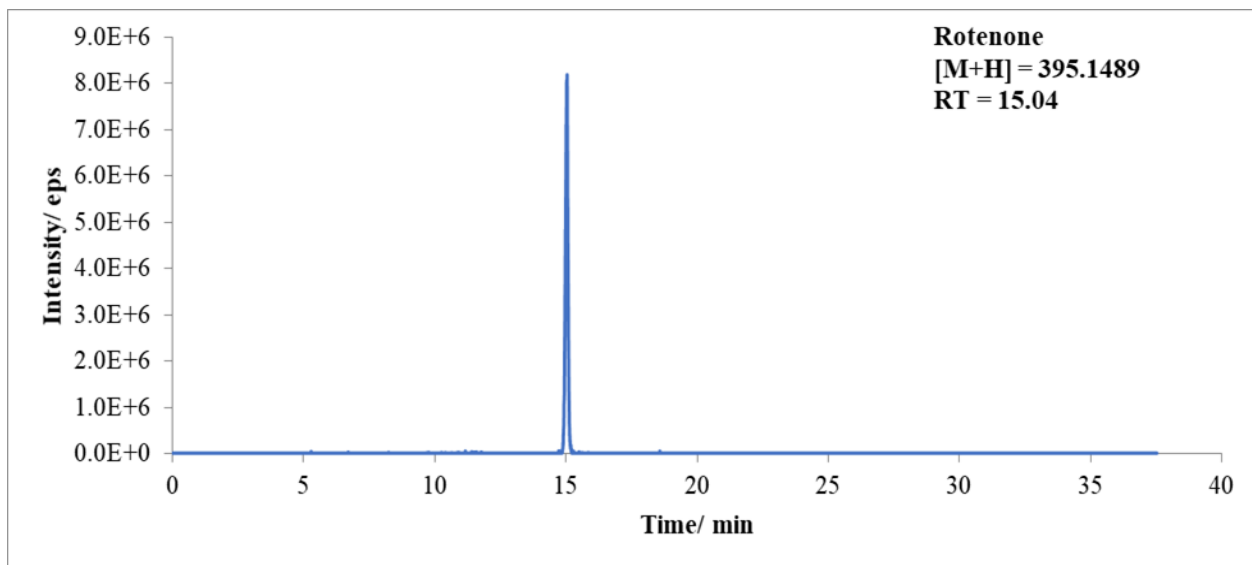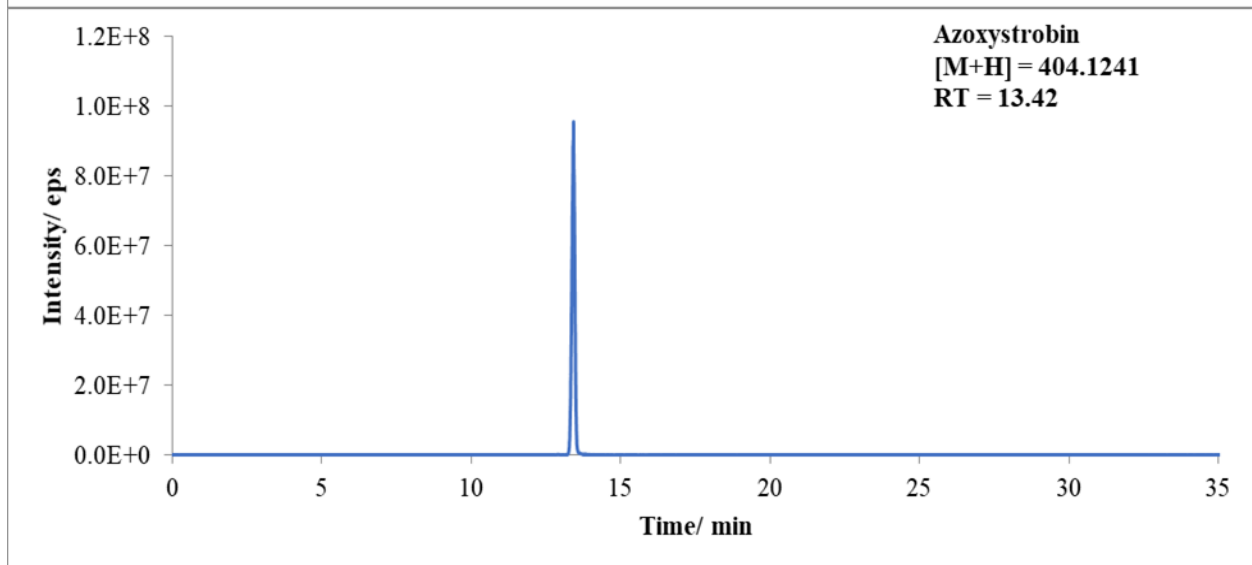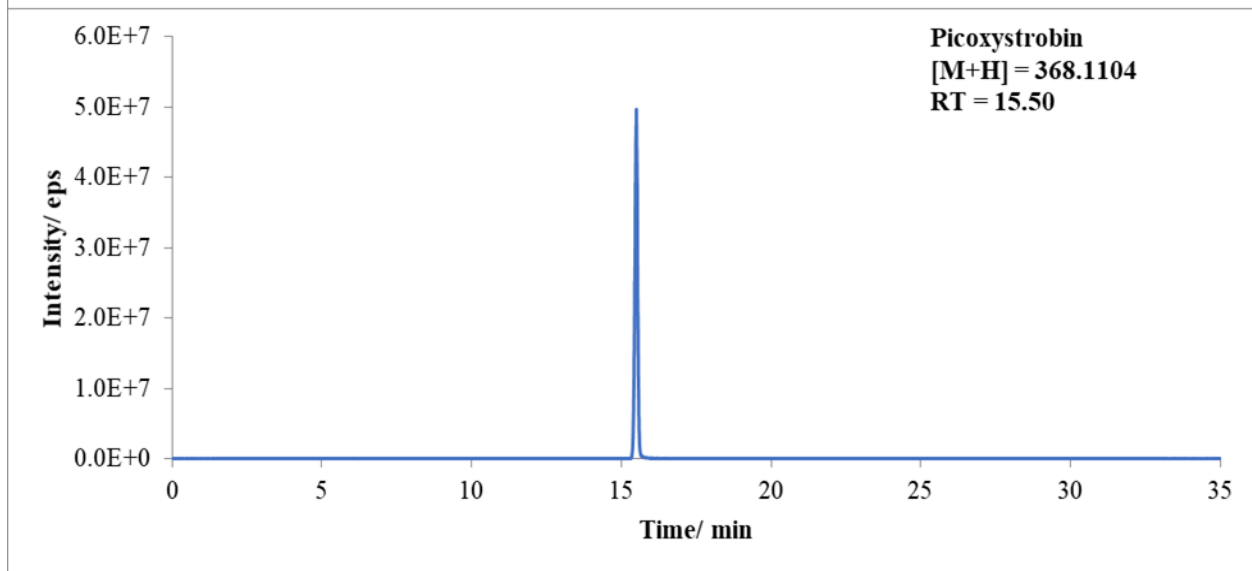

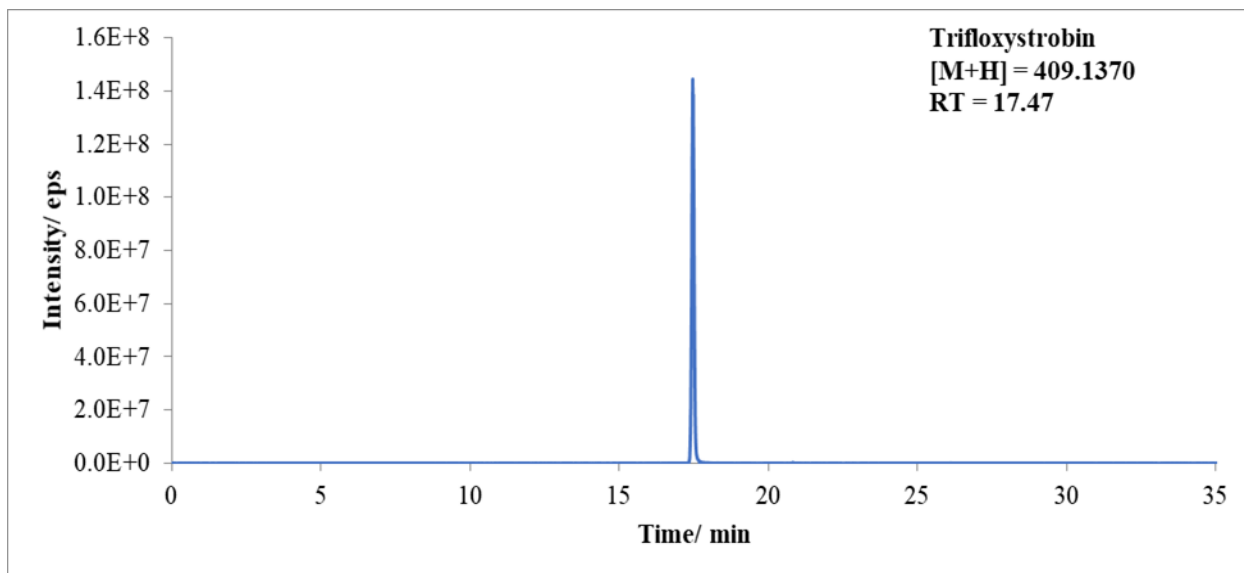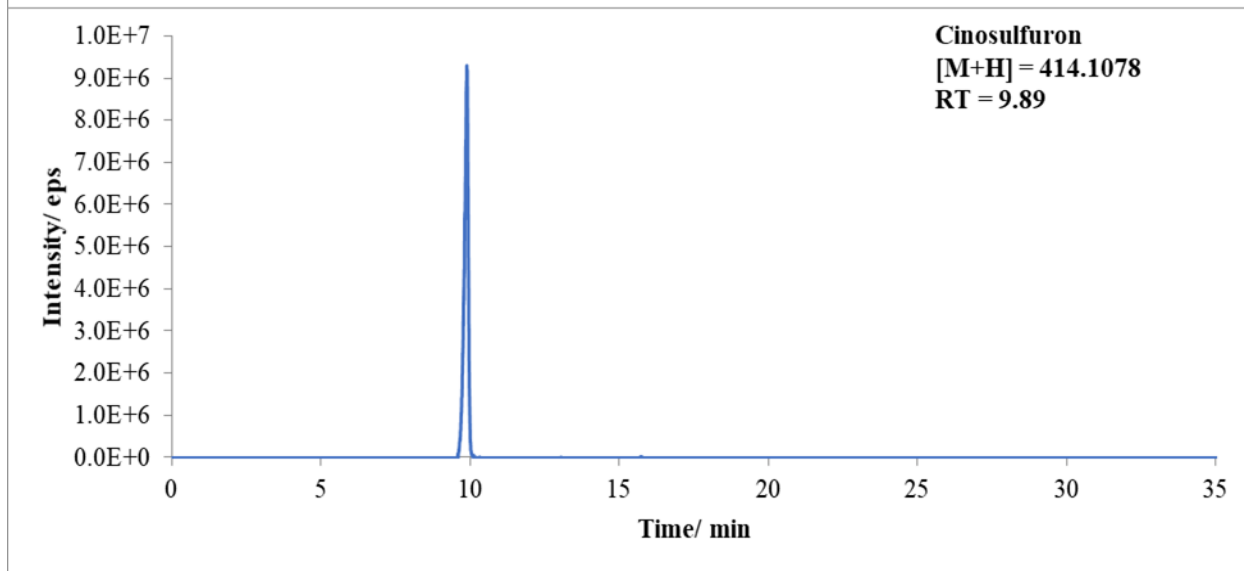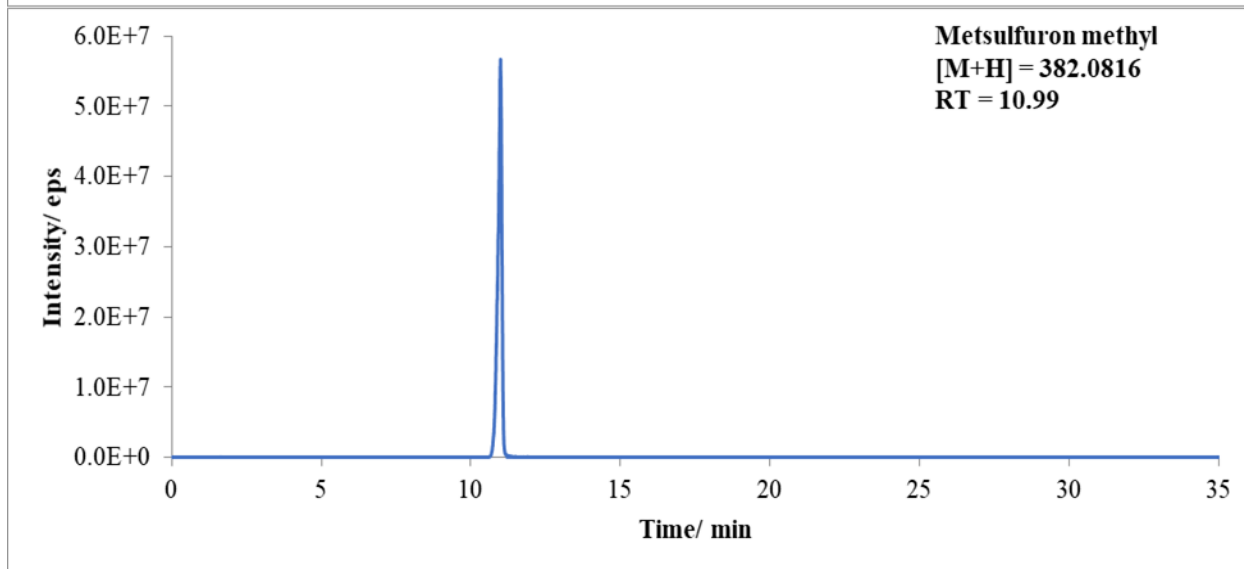

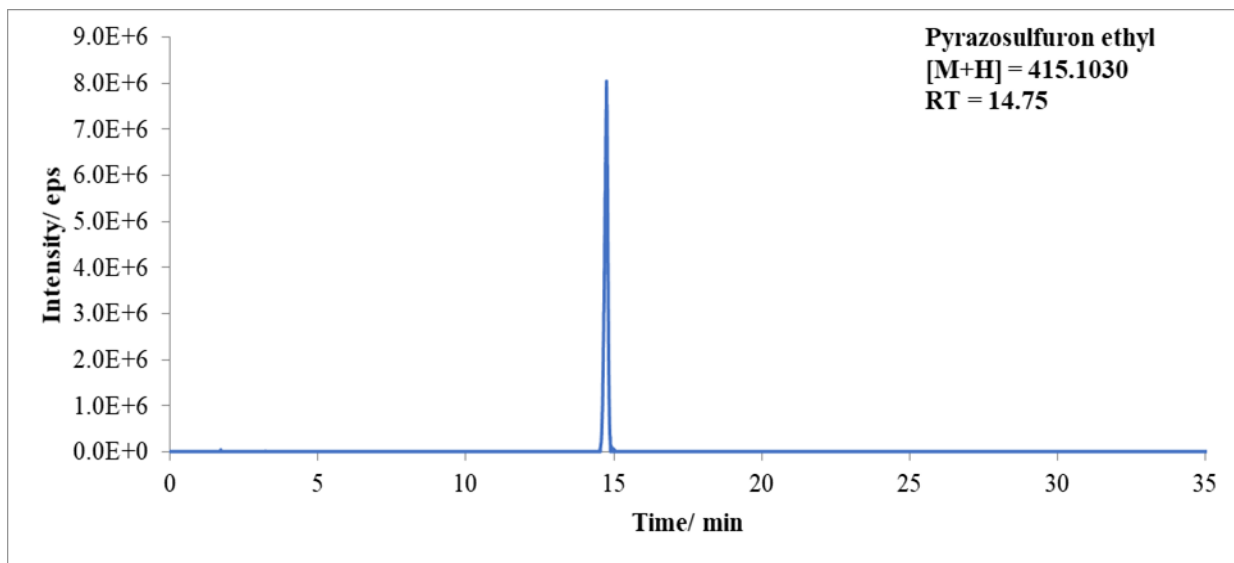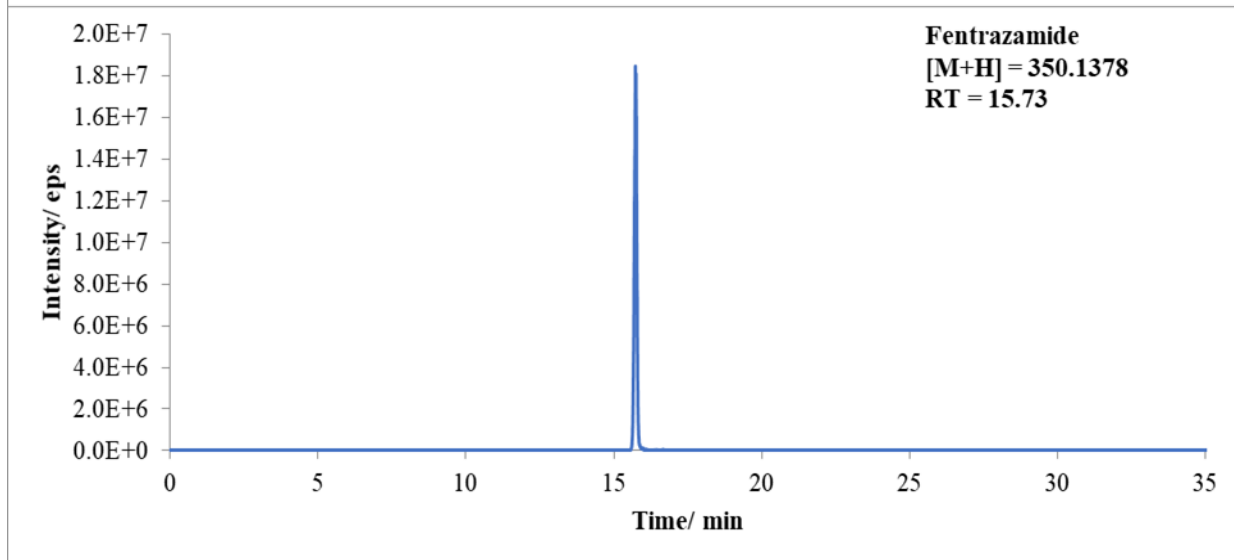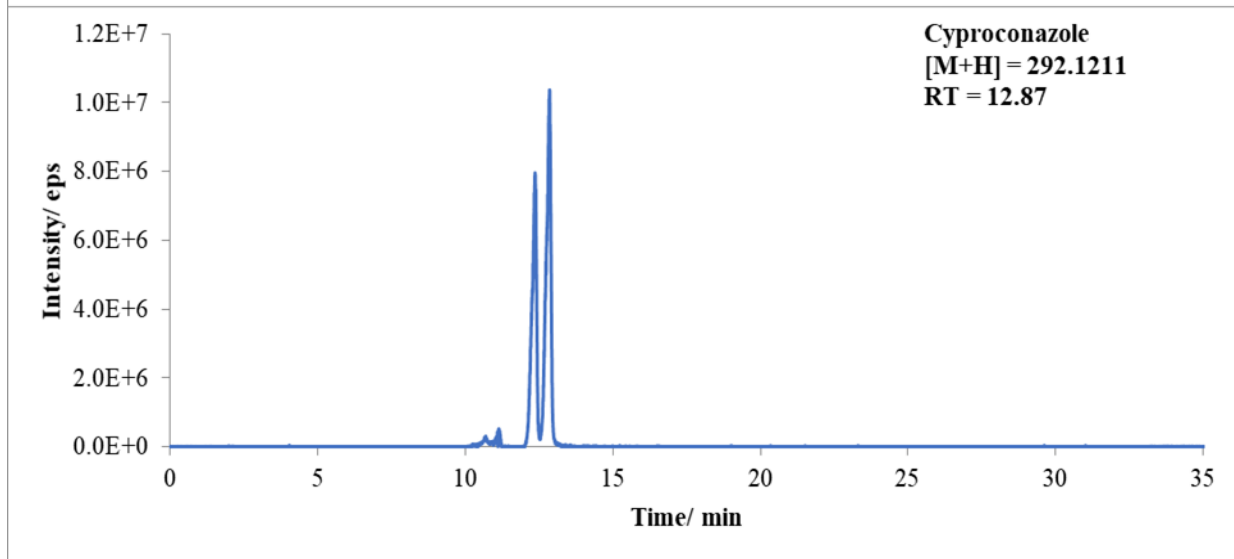

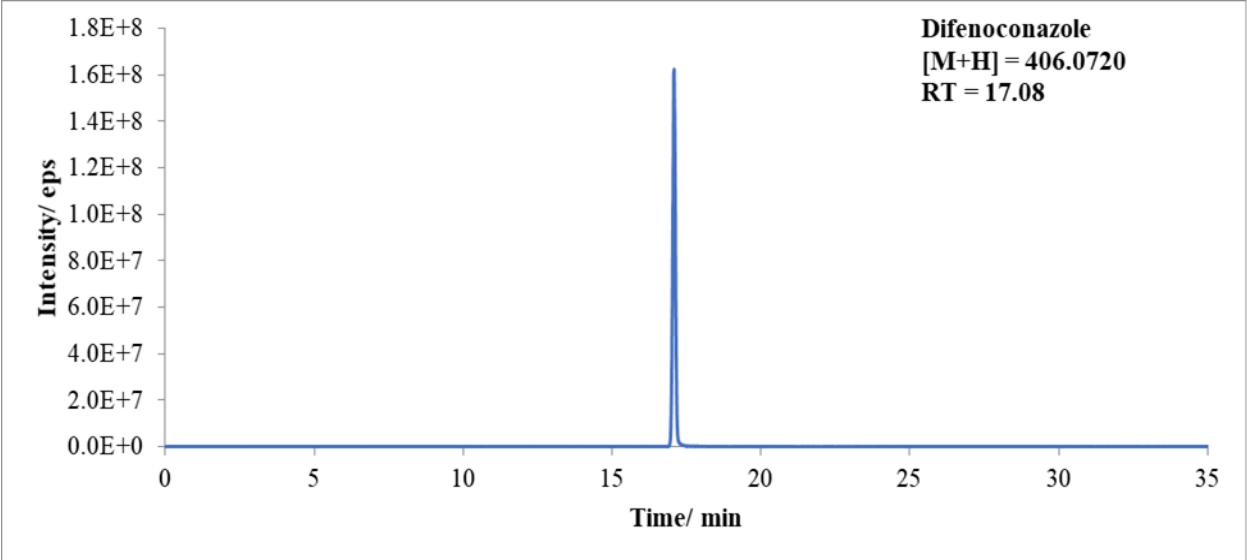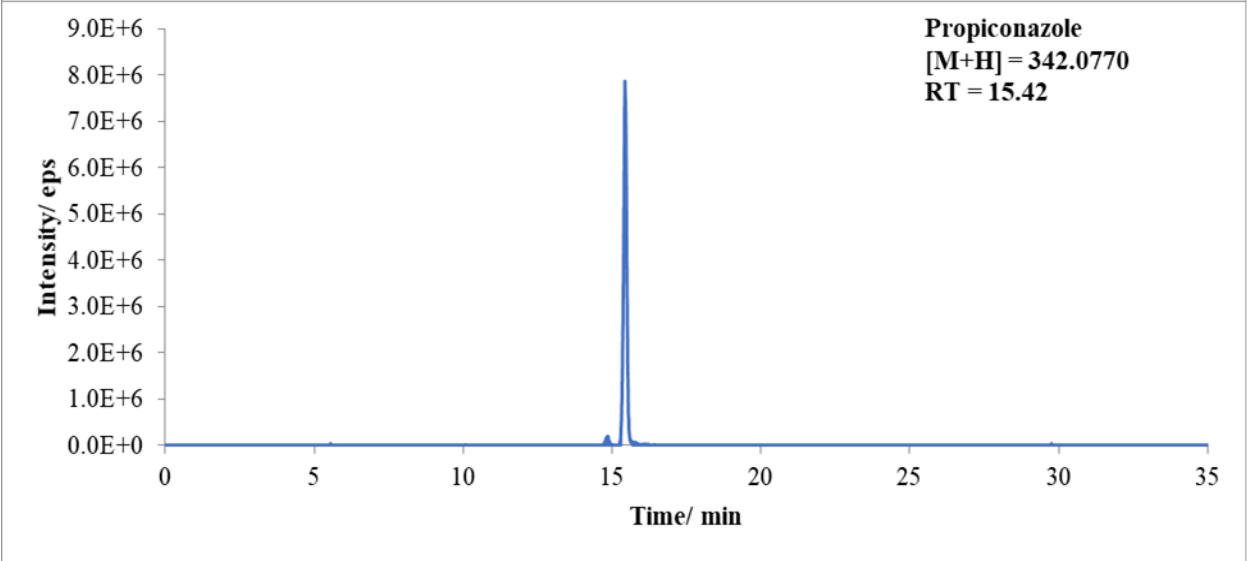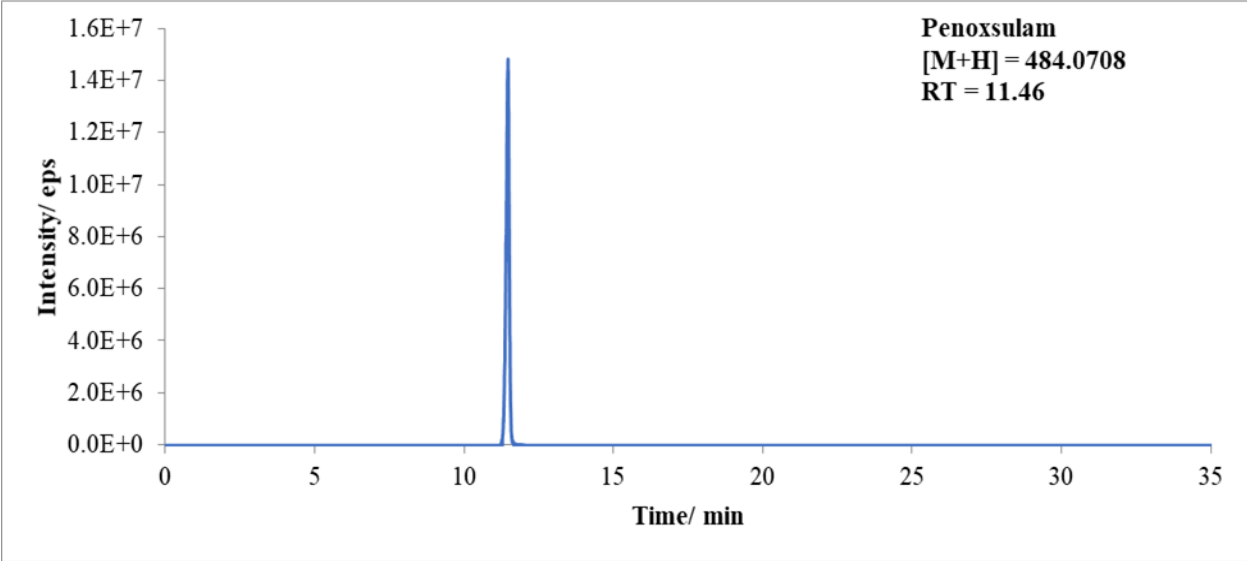

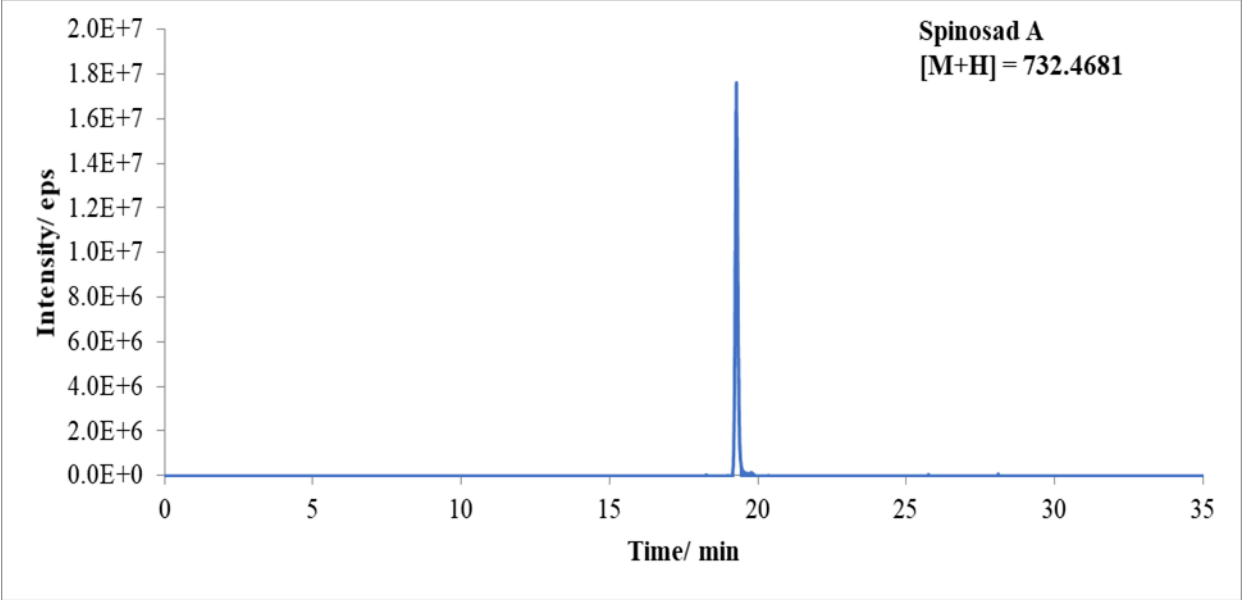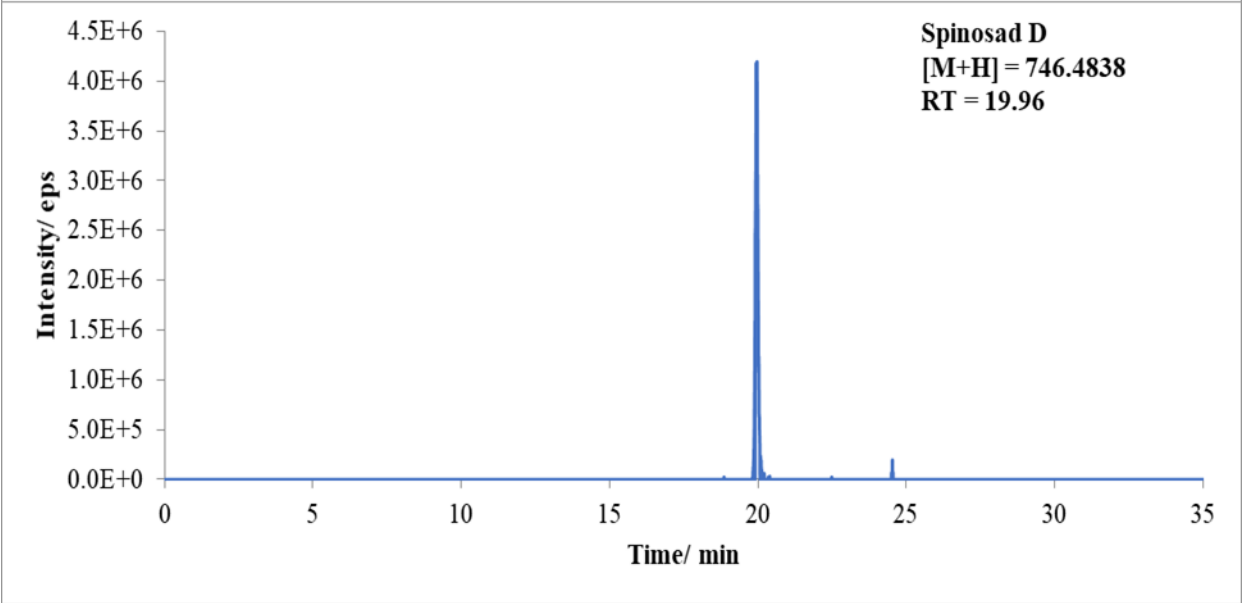

Fig. S4. The total ion chromatogram and extracted ion chromatogram of the target analytes in the matrix match solution (negative mode)

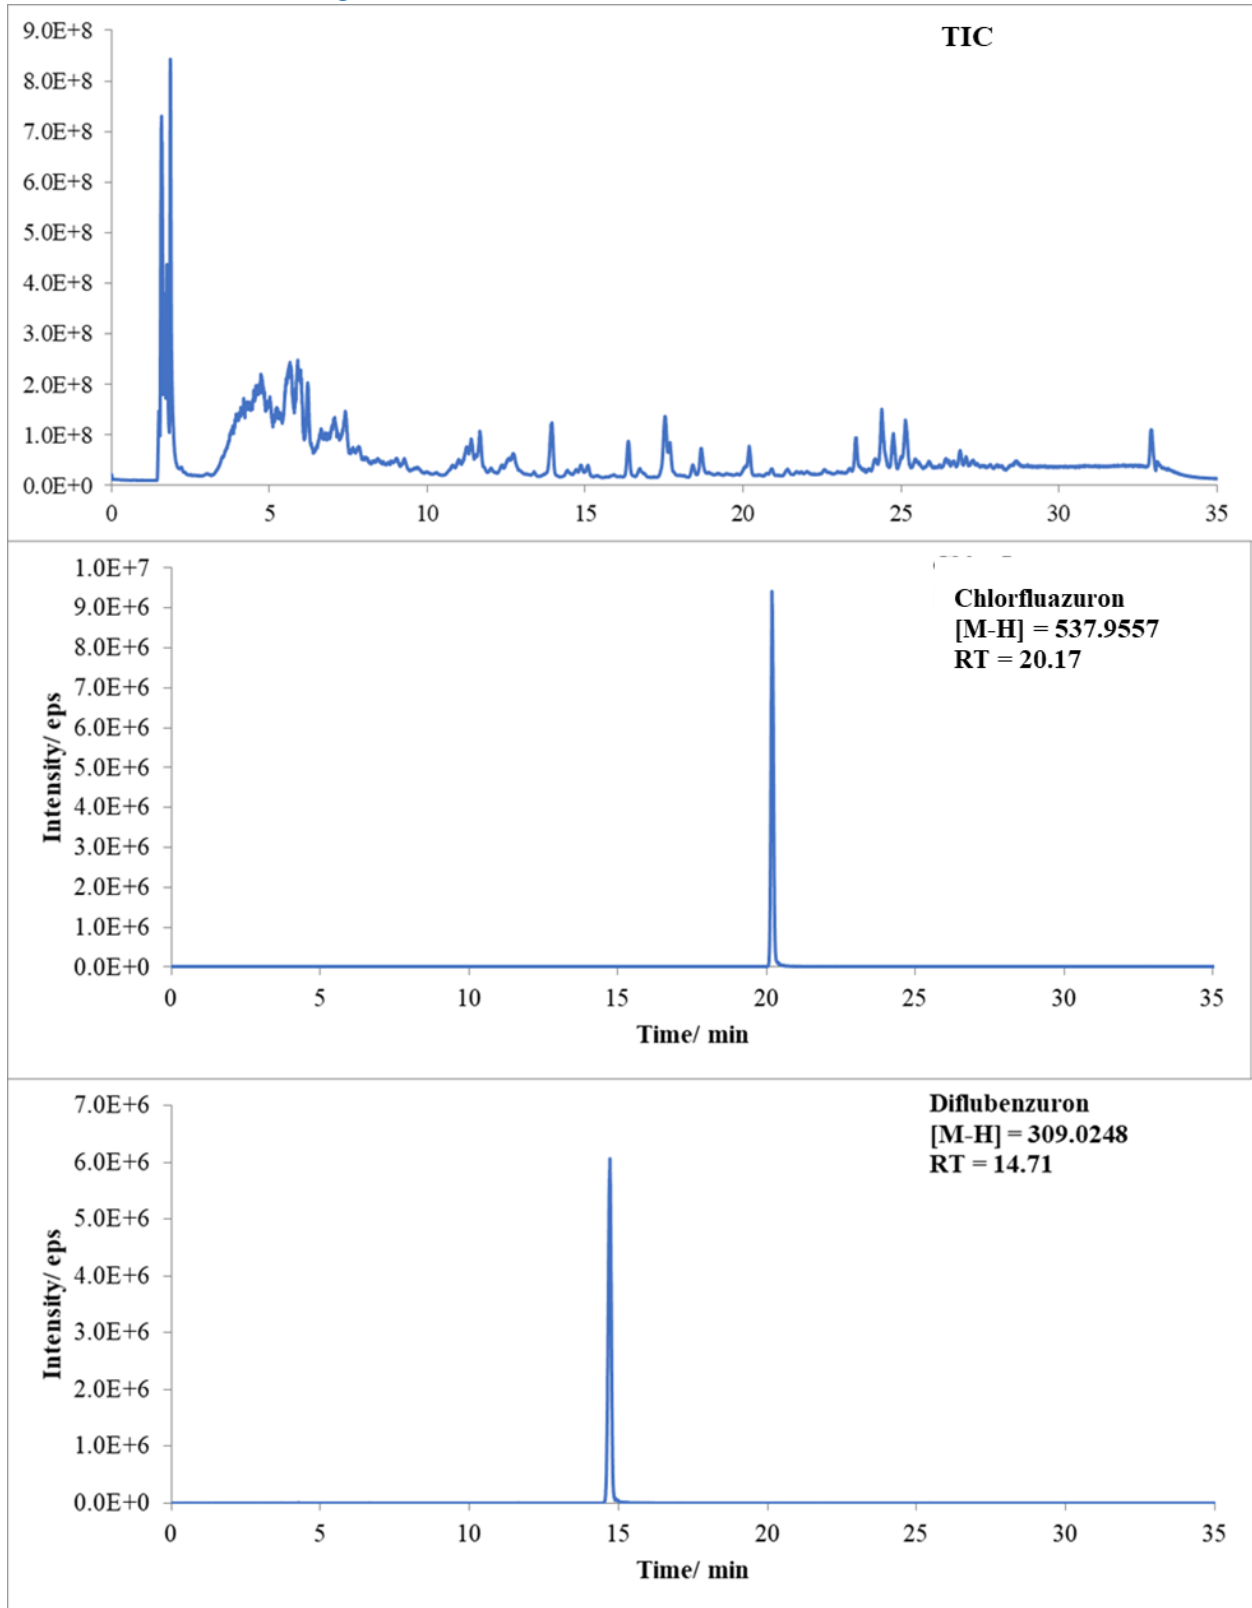



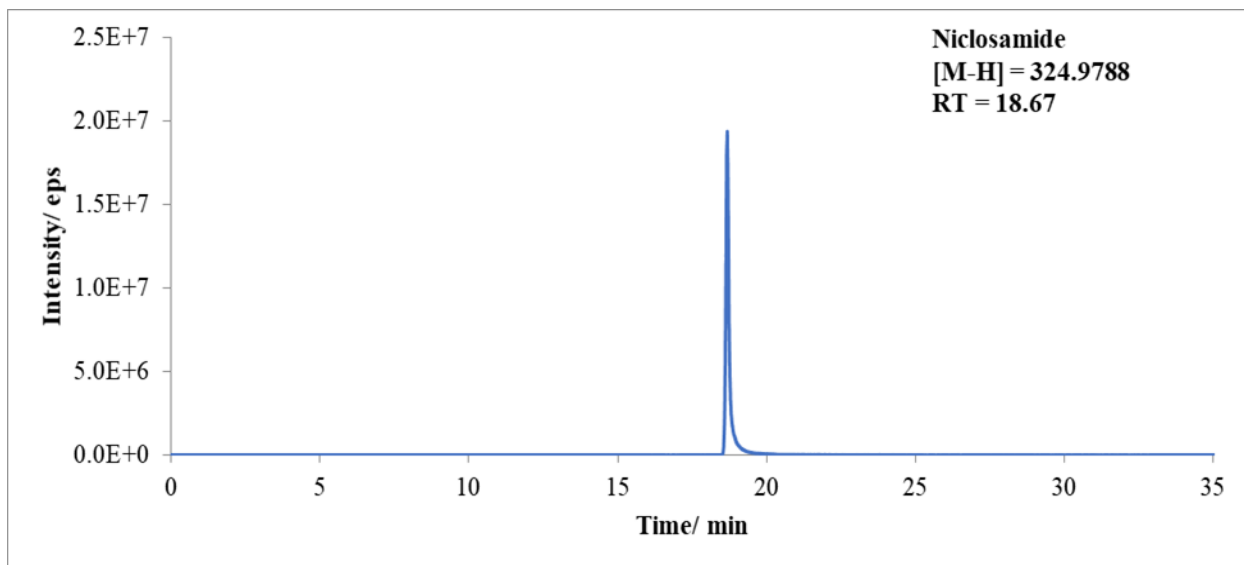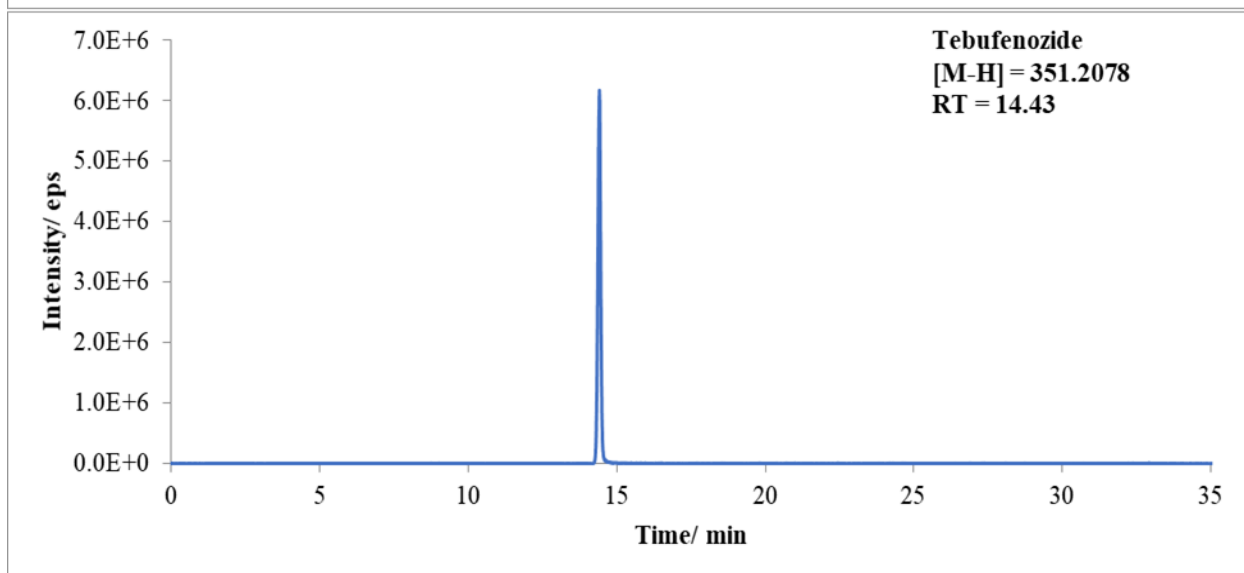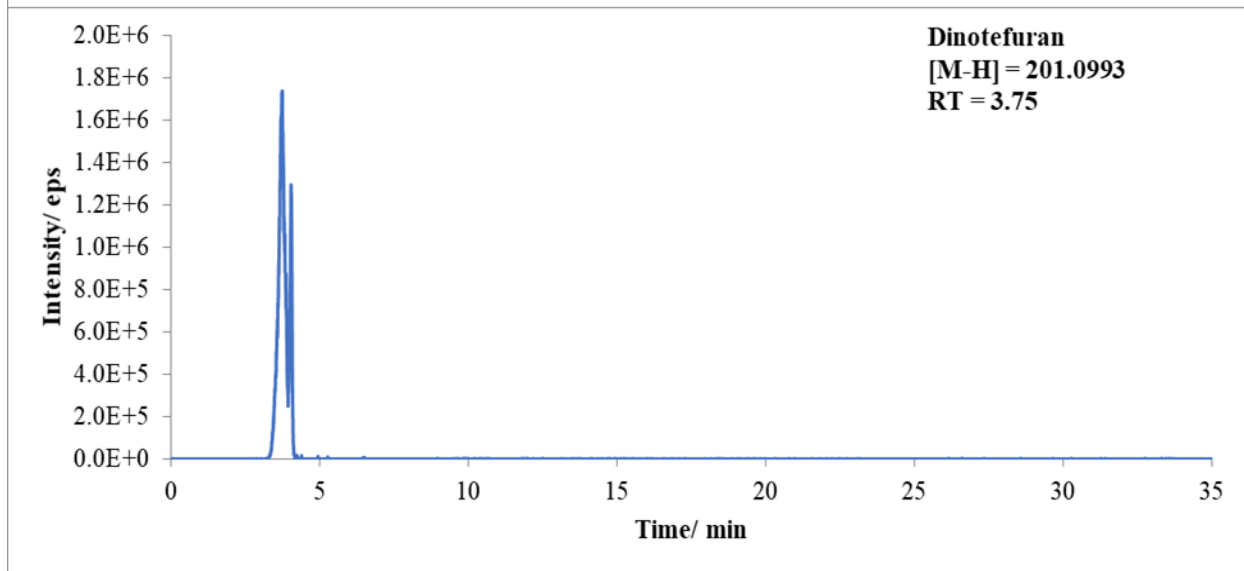

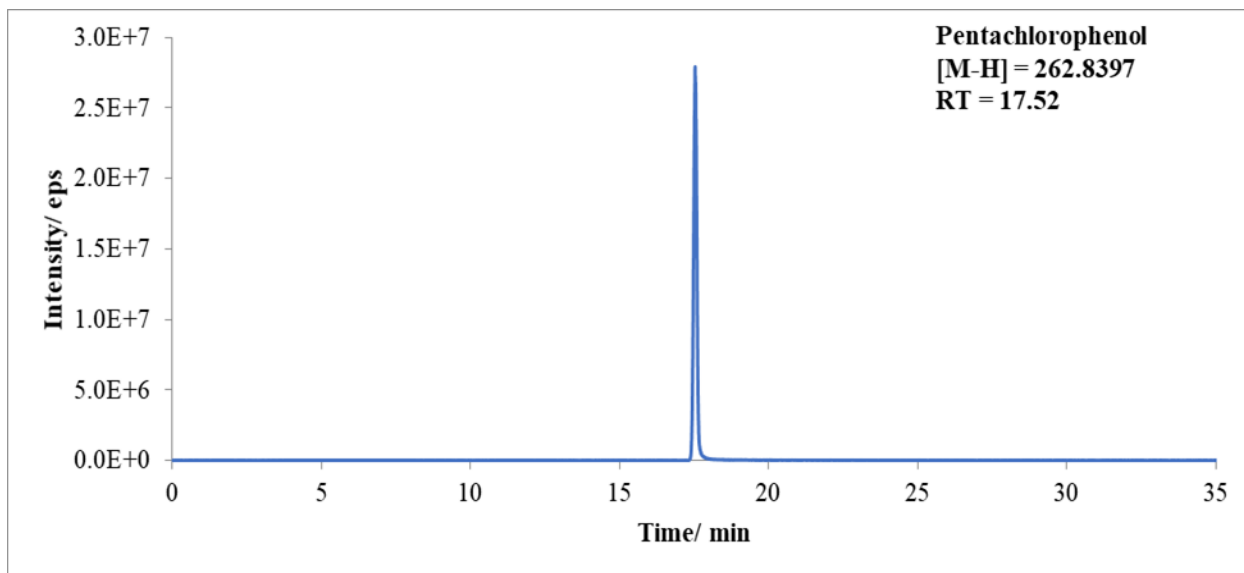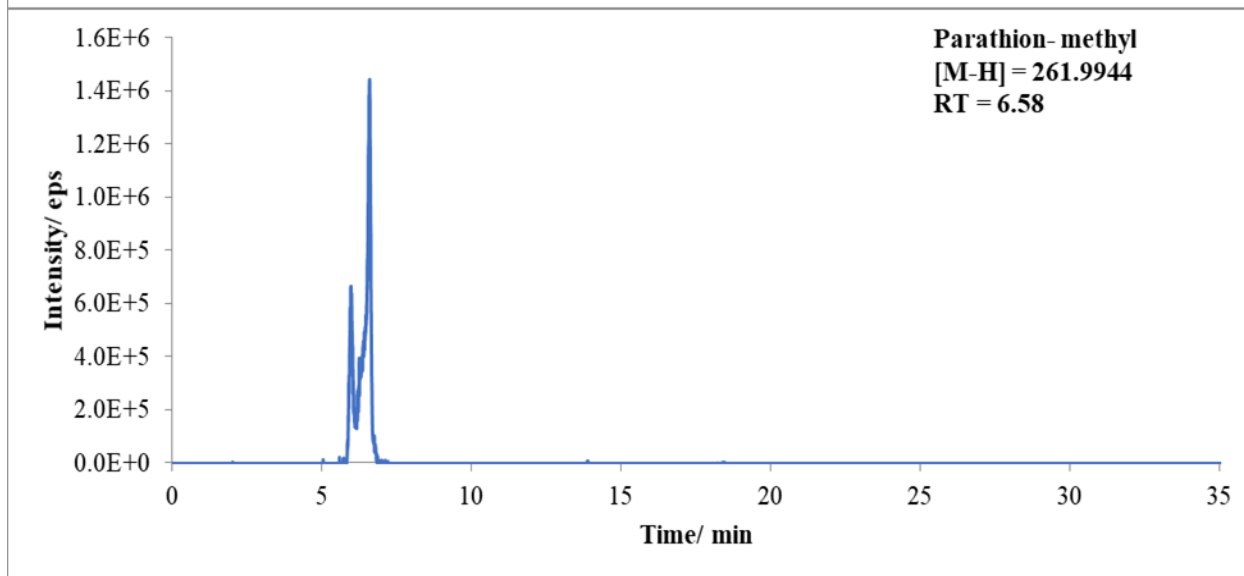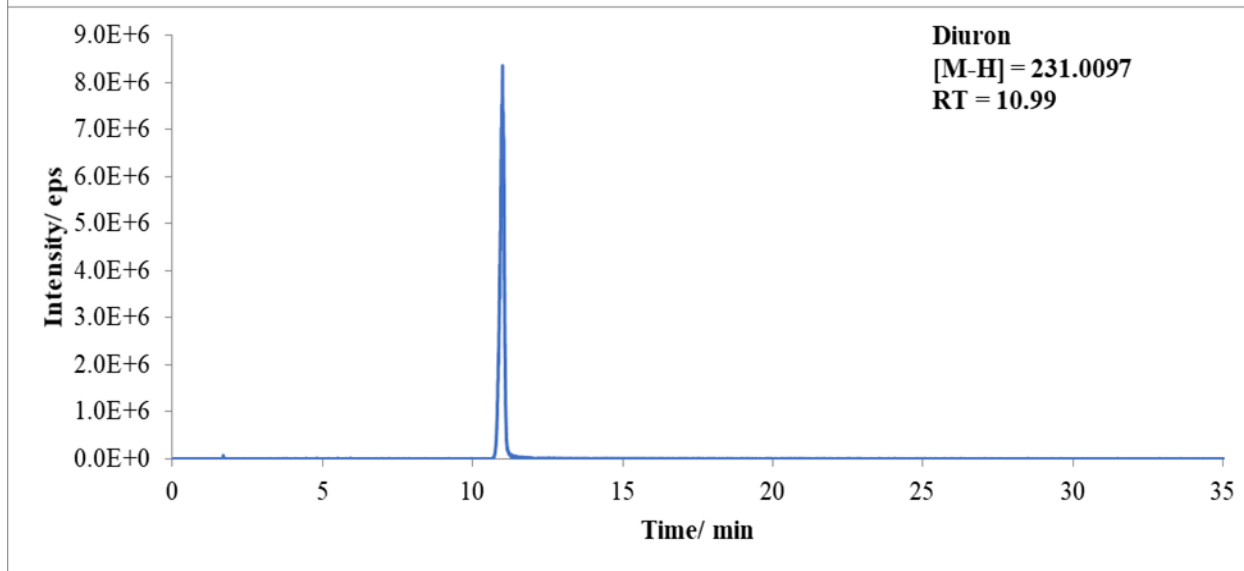

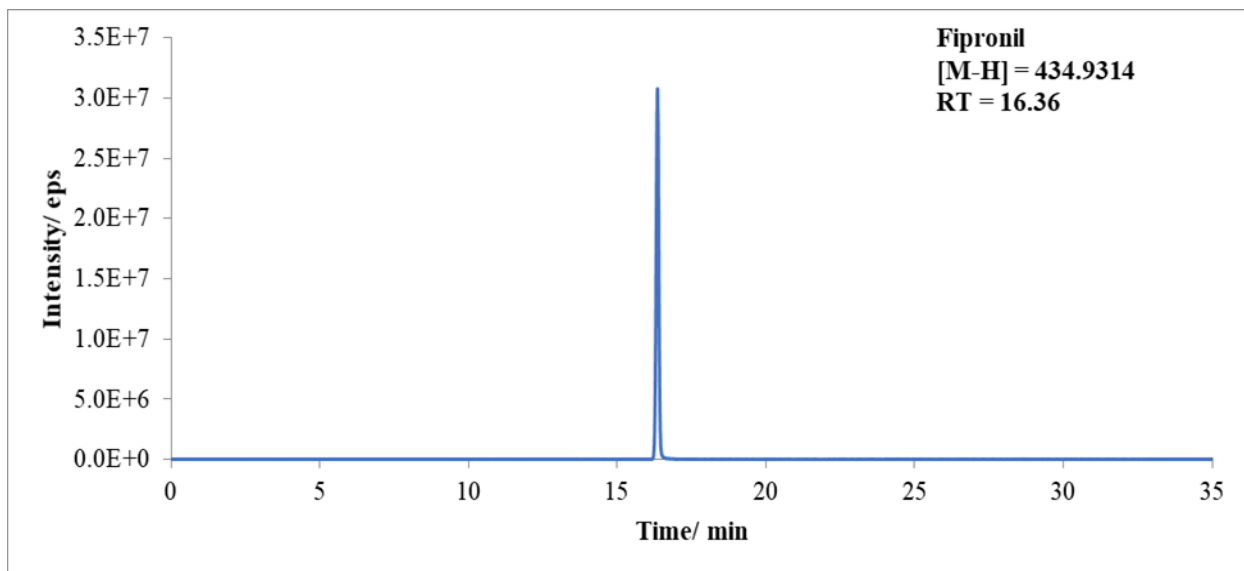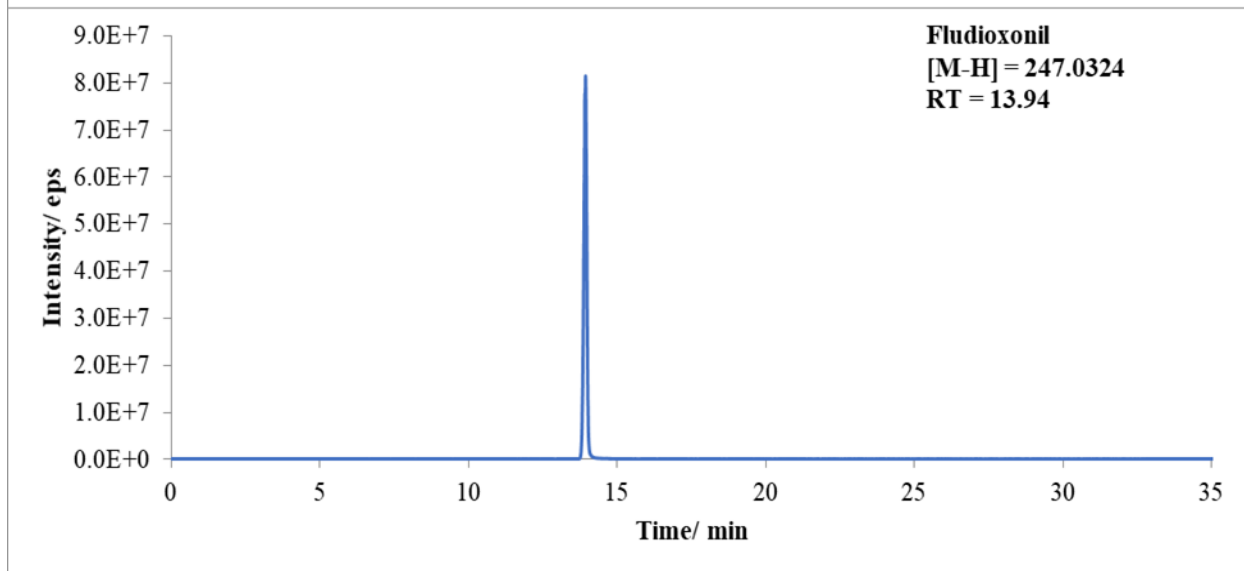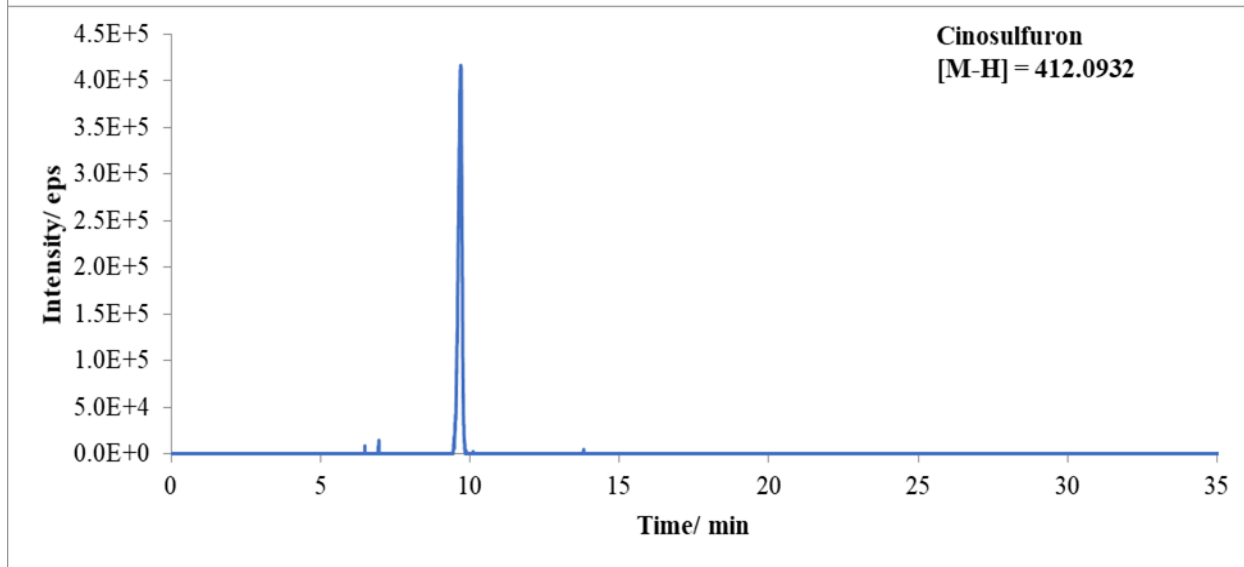

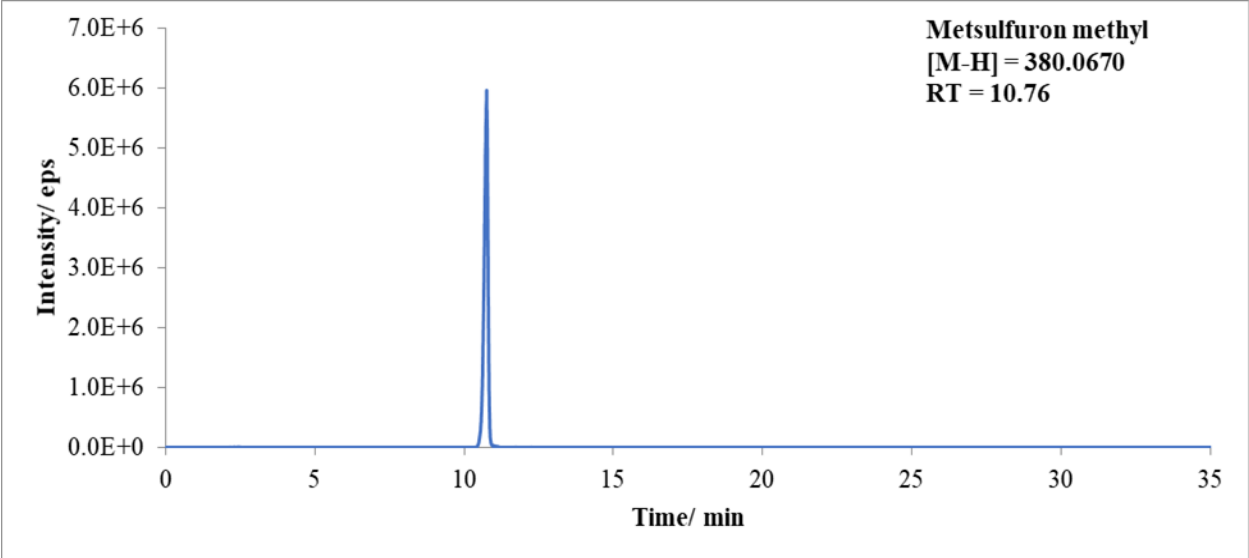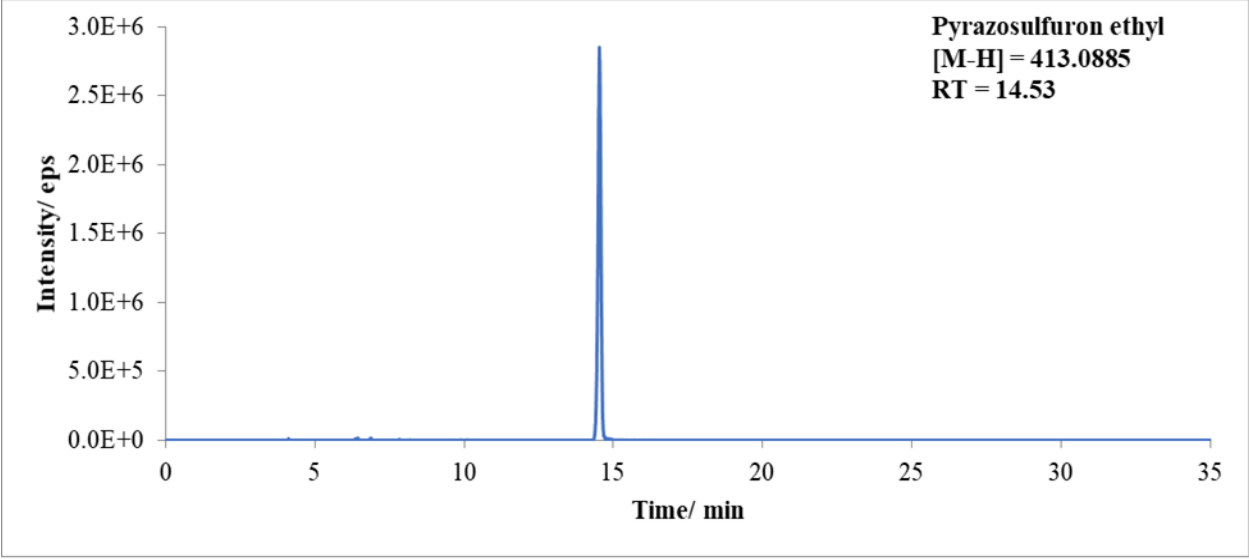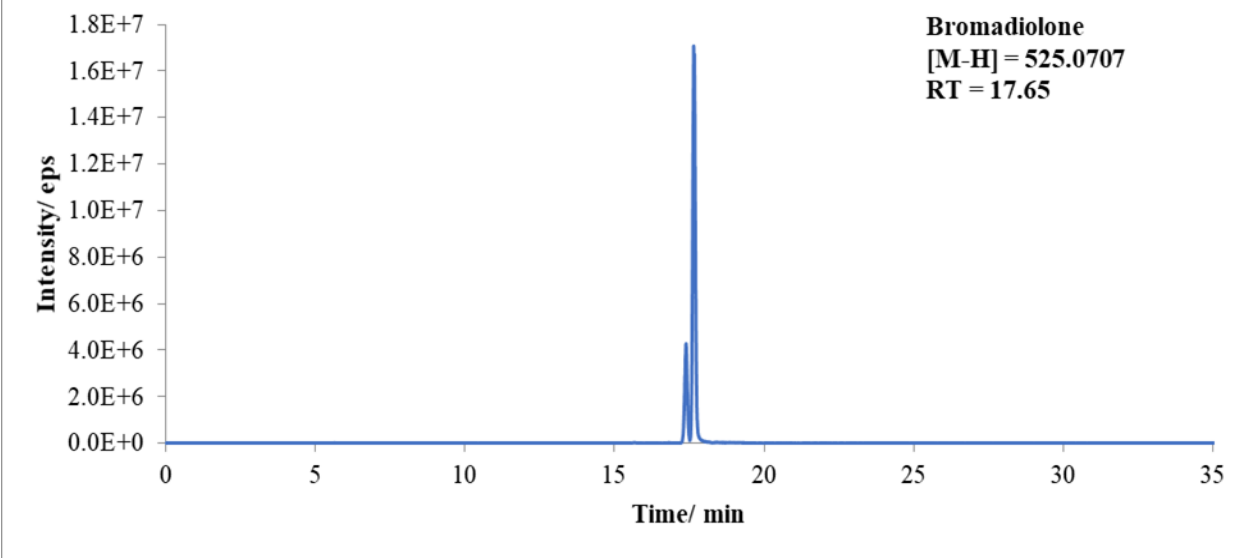

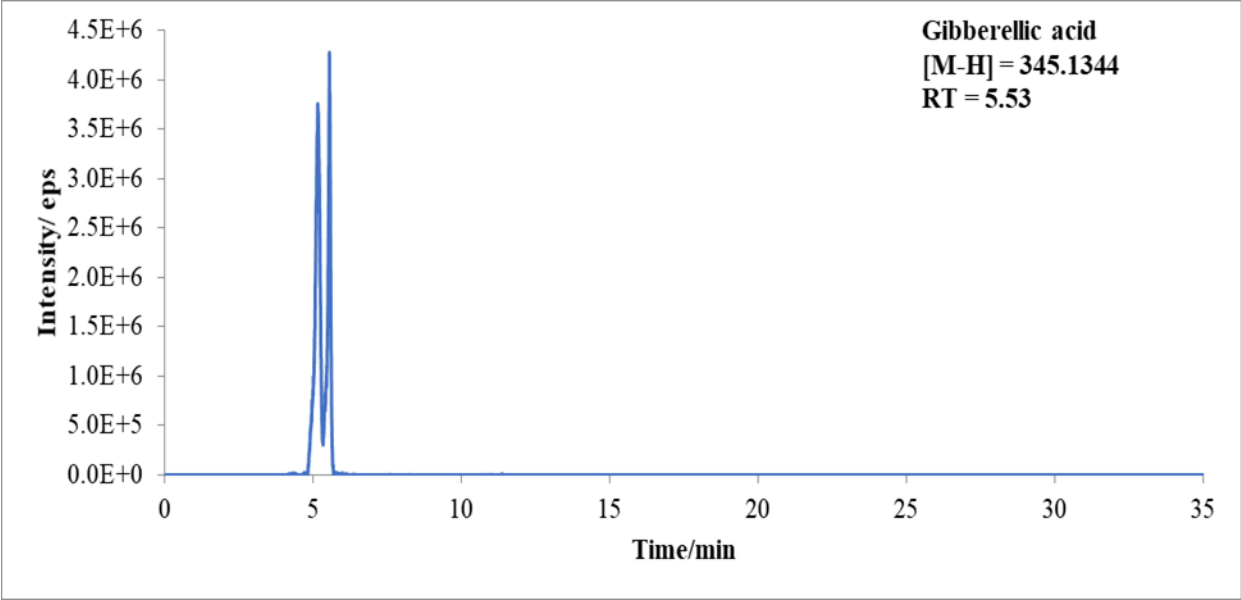

Fig. S5: The total ion chromatogram and extract ion chromatogram of the target analytes in several real samples (positive mode)

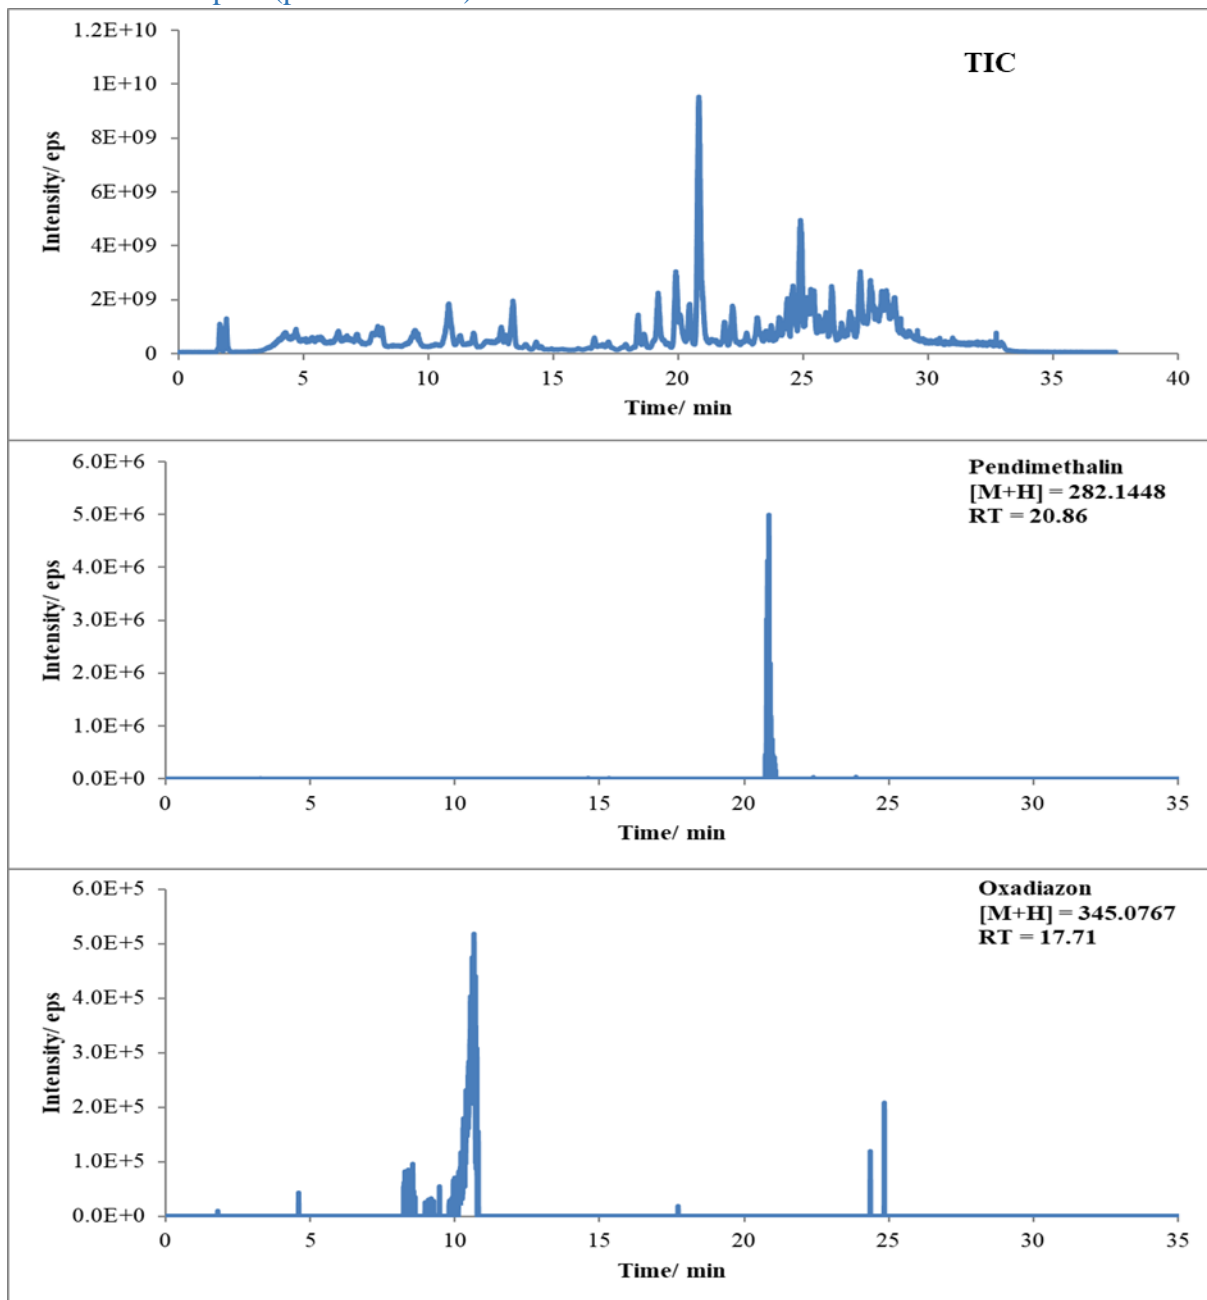

Edible chrysanthemum

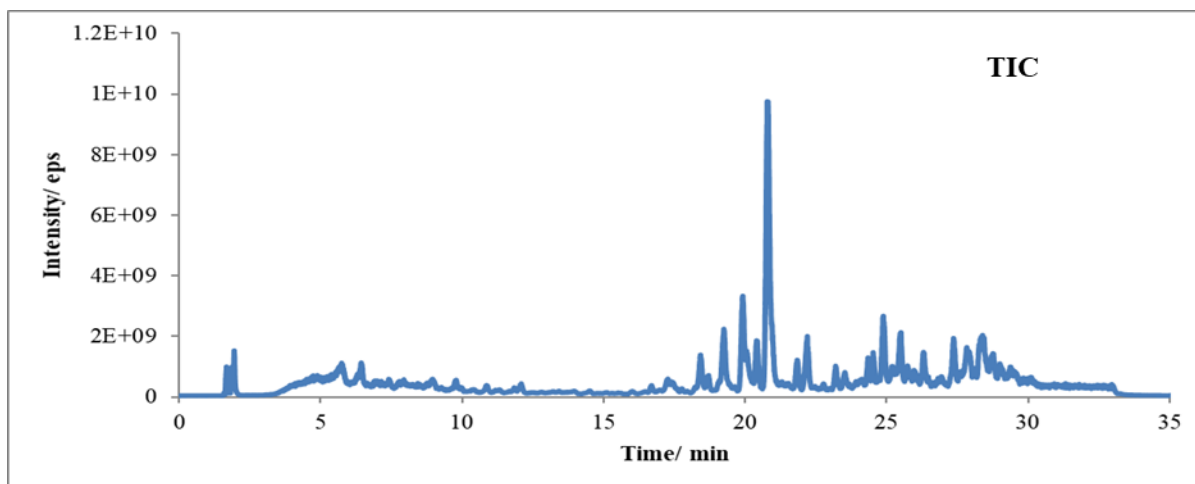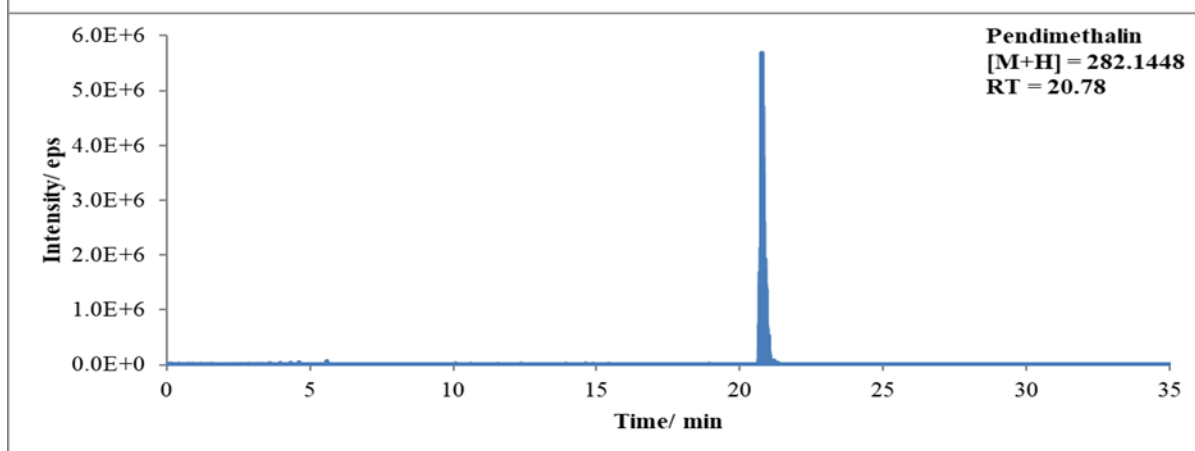

Green salad

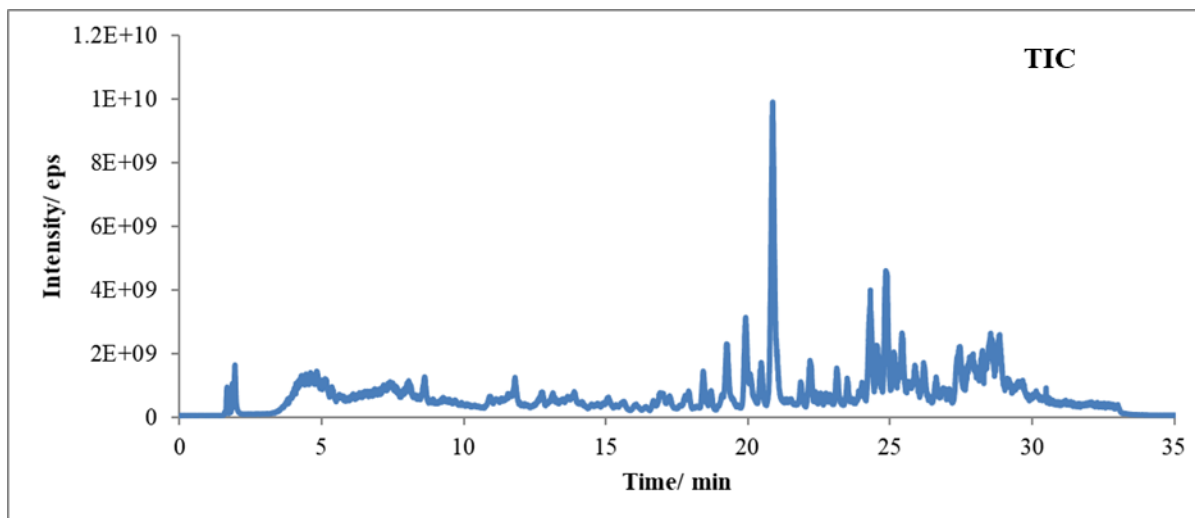

Perilla vegetable

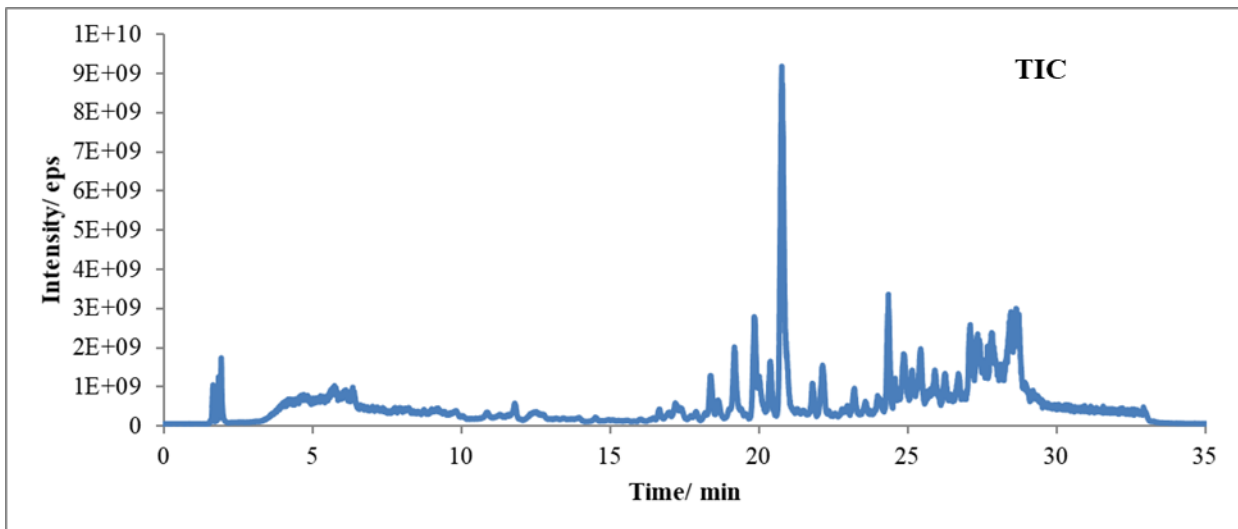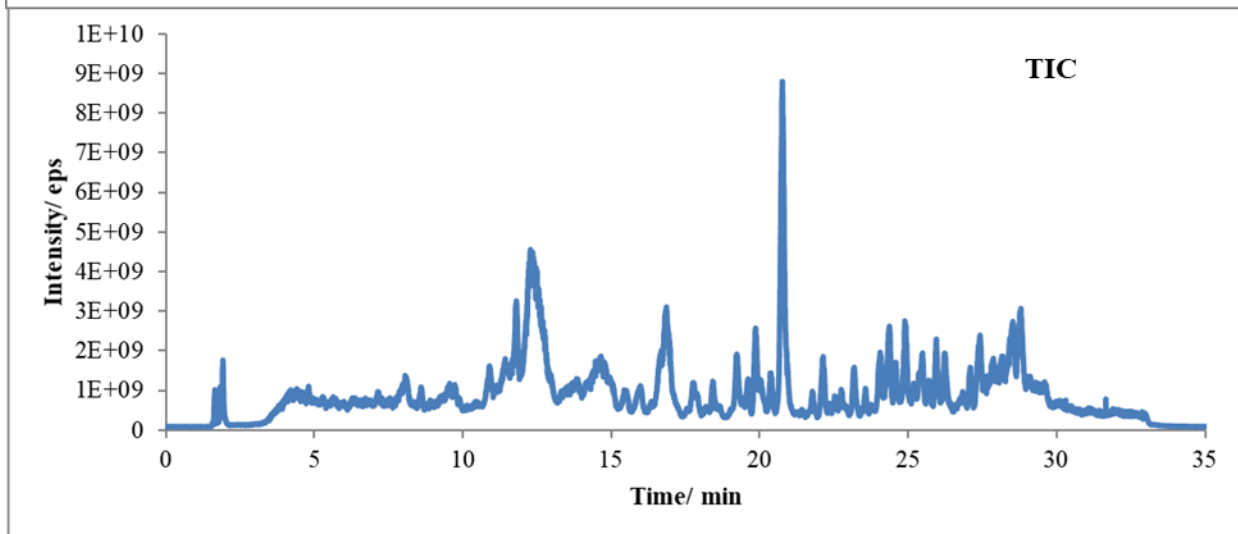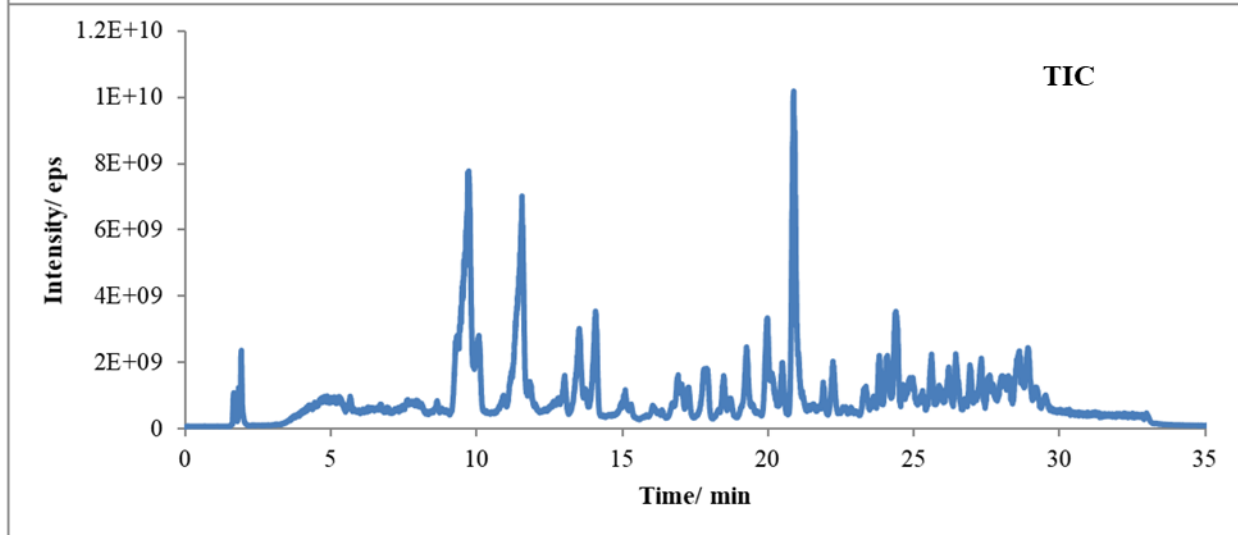

TIC of kales, oregano and coriander



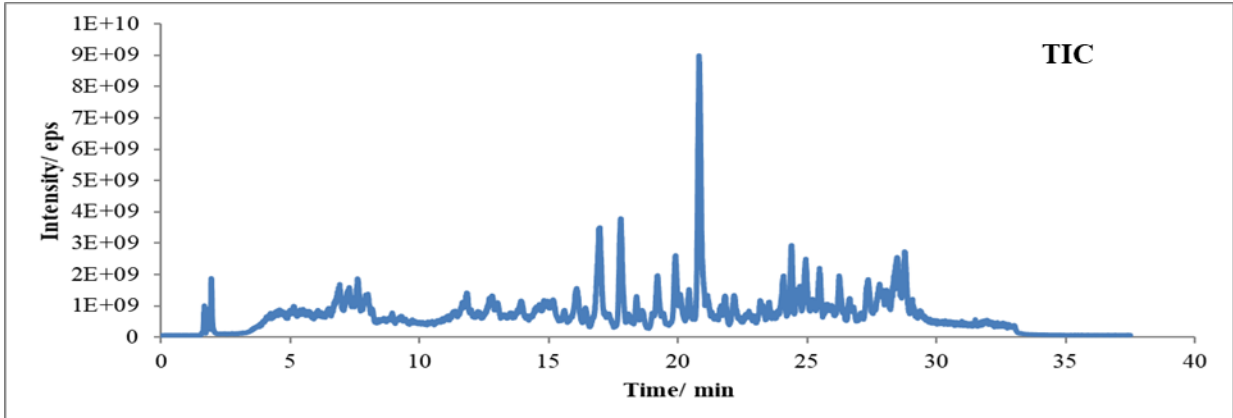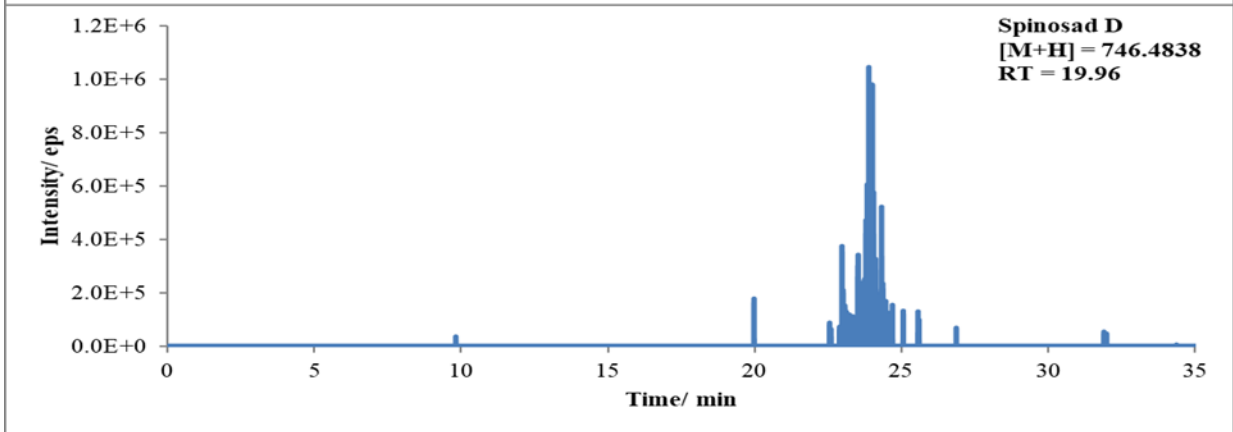

Morning spinach

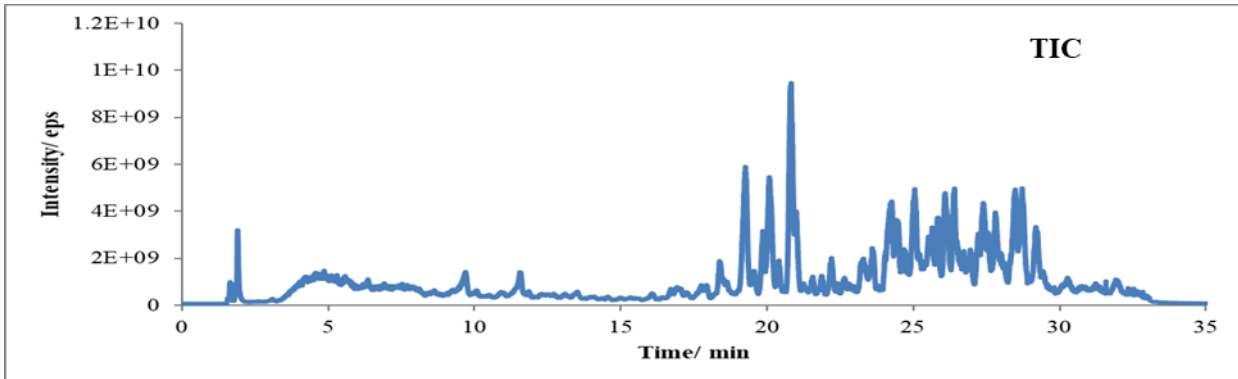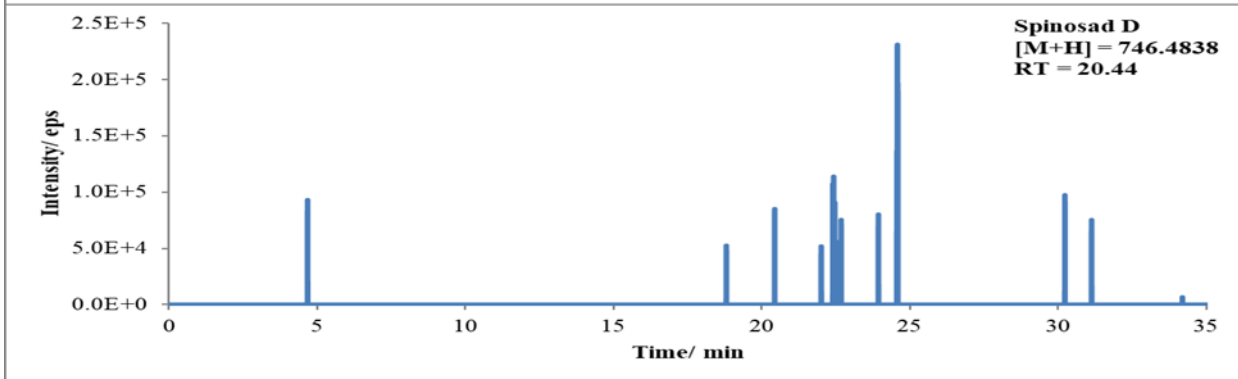

Shrinkage vegetable

Fig. S6. The total ion chromatogram and extracted ion chromatogram of the target analytes in several real samples (negative mode)

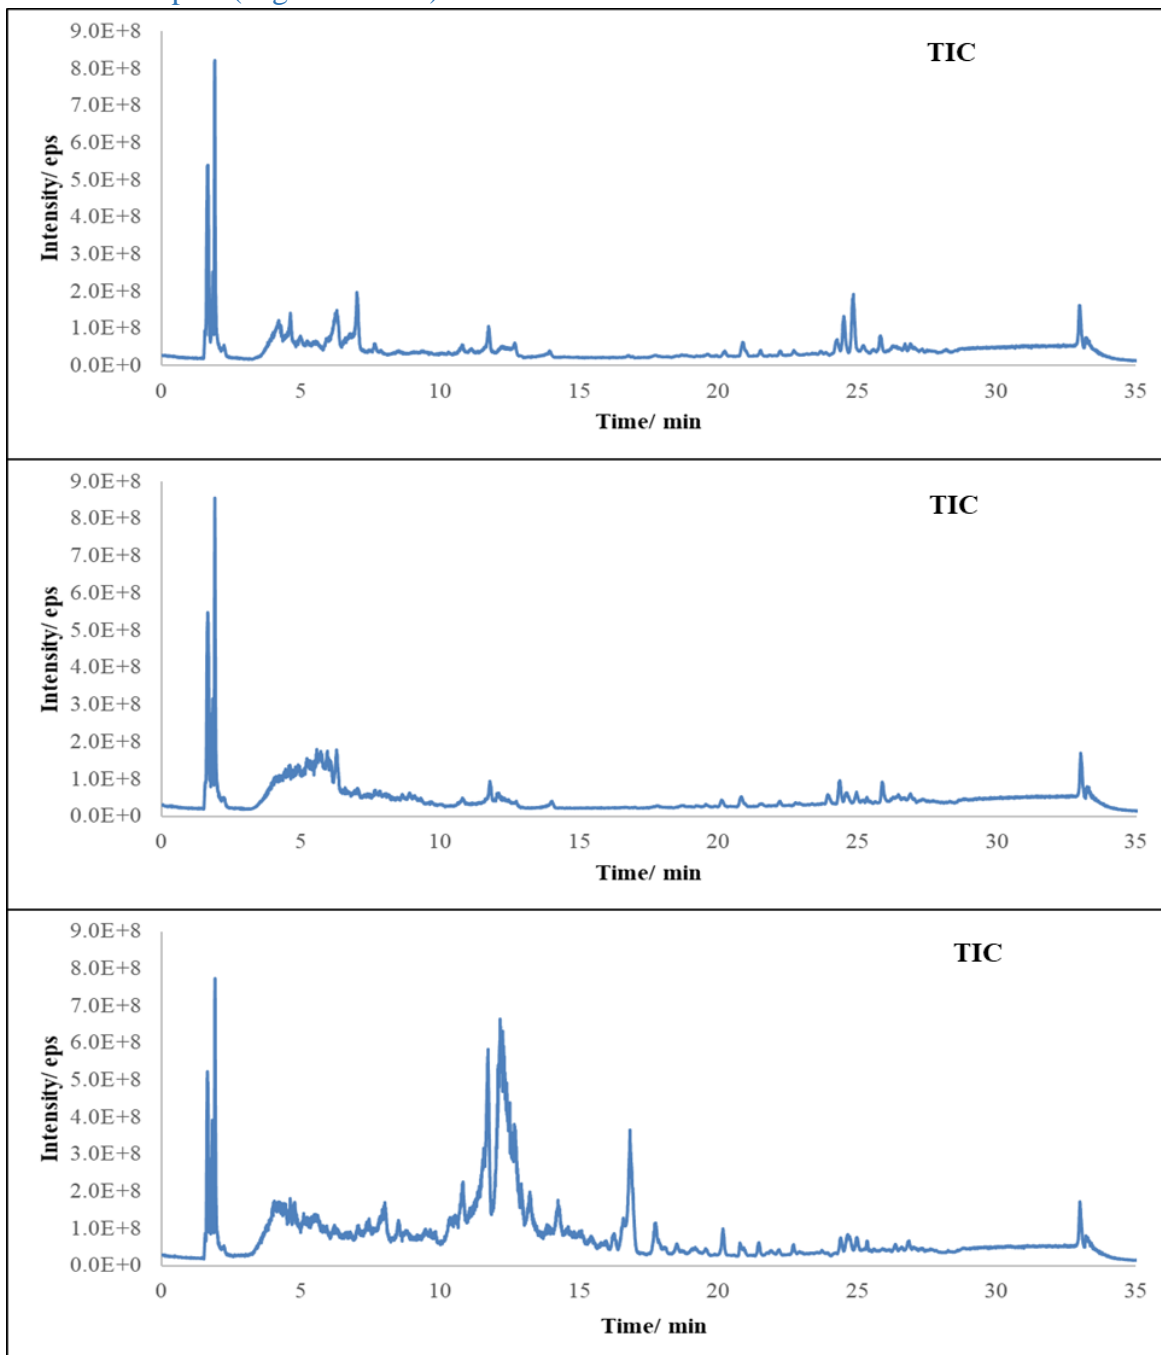

Edible chrysanthemum - kales- oregano

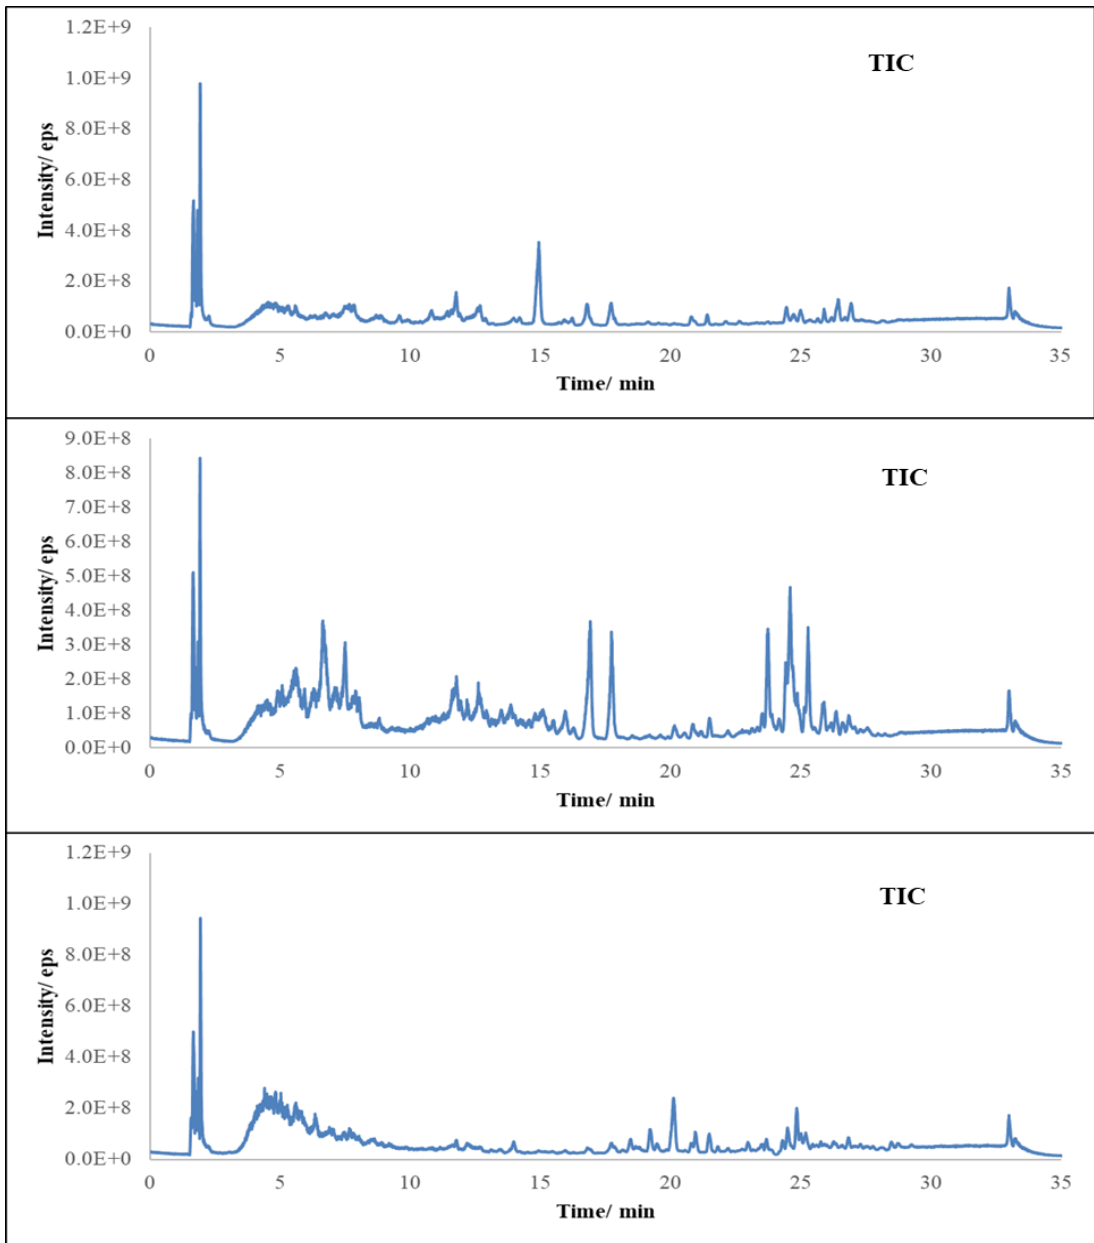

coriander- spinach- shrinkage vegetable
